# Supplementary material for: New constraints on biological production and mixing processes in the South China Sea from triple isotope composition of dissolved oxygen
Source: Copernicus journal article supplement (doi:10.5194/bg-19-2043-2022), 2022-04-14
Supplement: Supplementary file 1 [file bg-19-2043-2022-supplement.zip]

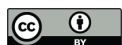

*Supplement of*

**New constraints on biological production and mixing processes in the South China Sea from triple isotope composition of dissolved oxygen**

**Hana Jurikova et al.**

*Correspondence to:* Hana Jurikova (hj43@st-andrews.ac.uk) and Mao-Chang Liang (mcl@gate.sinica.edu.tw)

- bg-19-2043-2022-supplement-title-page.pdf
- Supplement 8Mar22.xlsx

The copyright of individual parts of the supplement might differ from the article licence.
