# Supplementary material for: New constraints on biological production and mixing processes in the South China Sea from triple isotope composition of dissolved oxygen
Source: Copernicus journal article supplement (doi:10.5194/bg-19-2043-2022), 2022-04-14
Supplement: Supplementary file 1 [file Supplement 8Mar22.xlsx]

## Sheet: Table S1
	Supplement to Jurikova et al. (2022) Biogeosciences "New constraints on biological production and mixing processes in the South China Sea from triple isotope composition of dissolved oxygen"
	Table S1. Triple oxygen isotope and oxygen-argon composition of dissolved oxygen samples from South China Sea (SEATS) analysed in this study.
	Sampling date	Depth	δ17O	δ18O	17Δ	Δ(O2/Ar)
		(m)	(‰, vs. air)	(‰, vs. air)	(per meg)	(%, vs. air)
	October 16th, 2013	5	-0.0568861	-0.242196	68.5851	-
	October 16th, 2013	10	0.018966	-0.118256	80.2259	-
	October 16th, 2013	30	-0.0943453	-0.417965	122.201	-
	October 16th, 2013	50	-0.514601	-1.25671	136.652	-
	October 16th, 2013	80	2.571	4.61679	181.705	-
	October 16th, 2013	100	3.4723	6.37582	174.095	-
	October 16th, 2013	150	3.75921	6.96853	154.978	-
	October 16th, 2013	200	2.50526	4.6002	124.682	-
	October 16th, 2013	300	4.12911	7.70788	143.238	-
	October 16th, 2013	400	3.98844	7.51328	103.175	-
	October 16th, 2013	500	4.20833	7.90919	118.653	-
	August 5th, 2014	5	0.0674669	0.00189016	66.4855	0.239758
	August 5th, 2014	10	0.102367	0.103814	48.5886	-0.712204
	August 5th, 2014	20	-0.0991413	-0.310574	61.756	-0.533156
	August 5th, 2014	80	2.52503	4.4751	208.918	-42.2573
	August 5th, 2014	100	3.54749	6.43598	218.06	-48.4047
	August 5th, 2014	200	4.6779	8.76612	145.933	-60.5297
	August 5th, 2014	600	3.76915	6.92568	186.927	-68.3683
	August 5th, 2014	1000	4.35562	8.00546	215.841	-71.183
	August 5th, 2014	1800	4.38368	8.15368	167.621	-68.3448
	August 5th, 2014	2500	4.30604	7.96234	188.642	-67.245
	August 5th, 2014	3500	3.17381	5.84475	150.017	-65.6578
	August 6th, 2014	5	0.183786	0.286999	35.1254	-0.031356
	August 6th, 2014	10	0.139372	0.132363	70.8023	0.00684302
	August 6th, 2014	20	0.0989969	0.0853116	54.8025	-0.429186
	August 6th, 2014	50	-0.416391	-1.07246	139.353	-4.93166
	August 6th, 2014	80	1.40612	2.36293	182.581	-33.0925
	August 6th, 2014	200	5.20907	9.67693	206.995	-57.1659
	August 6th, 2014	400	4.51882	8.35181	200.371	-63.0529
	August 6th, 2014	600	5.07589	9.37613	228.843	-71.177
	August 6th, 2014	1000	4.90596	9.12833	186.941	-72.1135
	August 6th, 2014	1200	4.76828	8.80634	215.228	-70.7209
	August 6th, 2014	1800	4.46773	8.27209	190.459	-68.8101
	August 6th, 2014	2500	4.22349	7.87653	150.541	-66.5078
	August 6th, 2014	3500	4.15736	7.74603	151.762	-65.2311
	April 24th, 2015	5	0.222211	0.35065	40.5818	1.62886
	April 24th, 2015	10	0.0937909	0.0824313	51.0889	1.3081
	April 24th, 2015	20	-0.0945244	-0.304987	63.4784	-4.51913
	April 24th, 2015	80	2.1356	3.86387	135.7	-3.60899
	April 24th, 2015	100	3.12872	5.81698	119.365	-36.0784
	April 24th, 2015	150	3.42655	6.38321	124.7	-41.1692
	April 24th, 2015	200	1.99217	3.73134	60.9529	-33.1256
	April 24th, 2015	300	4.19773	7.79573	166.416	-57.0689
	April 24th, 2015	400	3.76427	6.99285	147.509	-50.3995
	April 24th, 2015	500	4.75274	8.83084	187.185	-68.0875
	April 24th, 2015	600	4.94739	9.138	223.208	-70.4141
	April 24th, 2015	1000	4.58153	8.44342	215.74	-71.114
	April 24th, 2015	1800	4.48302	8.31785	182.177	-68.0105
	April 24th, 2015	3500	4.25194	7.8804	176.883	-65.2463
	April 25th, 2015	5	0.0836745	0.120024	21.5024	1.43841
	April 25th, 2015	10	0.116794	0.179987	23.5626	1.80174
	April 25th, 2015	20	0.159845	0.247741	31.5187	2.0185
	April 25th, 2015	30	-0.0319386	-0.194728	68.9397	2.22823
	April 25th, 2015	50	-0.417379	-1.04892	126.159	-2.01712
	April 25th, 2015	80	2.2661	4.14019	123.35	-29.3362
	April 25th, 2015	100	3.20618	5.92653	140.169	-37.1484

## Sheet: Table S2
	Supplement to Jurikova et al. (2022) Biogeosciences "New constraints on biological production and mixing processes in the South China Sea from triple isotope composition of dissolved oxygen"
	Table S3a. Reproducibility of air sample analyses over a range of oxygen-argon mixture concentrations. "err" represents the standard deviation of replicate analyses.
	O2-Ar conc. (µmol)	n (samples	δ17O	δ17O_err	δ18O	δ18O_err	17Δ	17Δ_err	δ(Ar/O2)	δ(Ar/O2)_err
	31	2	2.215	0.022	4.35	0.048	-0.039	0.002	185	5
	40	3	2.282	0.013	4.479	0.031	-0.038	0.006	167	3
	62	3	2.271	0.012	4.463	0.025	-0.04	0.004	175	5
		average	2.256		4.43067		-0.039		175.667
		SD	0.0359305		0.070316		0.001		9.0185
	Table S3b. Reproducibility of working reference analyses over a range of oxygen-argon mixture concentrations. "err" here represents the standard deviation of multiple mass spectrometric acquisitions.
	O2-Ar conc. (µmol)	n (samples	δ17O	δ17O_err	δ18O	δ18O_err	17Δ	17Δ_err	δ(Ar/O2)	δ(Ar/O2)_err
	22	1	0.0226667	0.0064291	0.0263333	0.0263333	0.0143785	0.00458988	4.53979	N/A
	36	1	-0.008	0.018735	0.0203333	0.0203333	0.00909413	0.0183655	2.9993	N/A
	50	1	-0.00566667	0.00763763	0.0256667	0.0256667	0.0121183	0.0104297	2.0046	N/A
		average	0.003		0.0241111		0.0118636		3.18123
		SD	0.0170717		0.00328859		0.00265135		1.27735

## Sheet: Table S3
	Supplement to Jurikova et al. (2022) Biogeosciences "New constraints on biological production and mixing processes in the South China Sea from triple isotope composition of dissolved oxygen"
	Table S2. CTD data from SEATS. Dissolved oxygen data is calibrated to manual measurements.
	LATITUDE [°N]	18
	LONGITUDE [°E]	116
	Time:	08:00:57							Time:	07:55:44							Time:	06:01:42							Time:	12:58:52							Time:	04:01:24
	Date	Depth	Pot Temp (degC)	Salinity	O (umolkg) Cal	O Sat (%) Cal	Fluor (ugl)		Date	Depth	Pot Temp (degC)	Salinity	O (umolkg) Cal	O Sat (%) Cal	Fluor (ugl)		Date	Depth	Pot Temp (degC)	Salinity	O (umolkg) Cal	O Sat (%) Cal	Fluor (ugl)		Date	Depth	Pot Temp (degC)	Salinity	O (umolkg) Cal	O Sat (%) Cal	Fluor (ugl)		Date	Depth	Pot Temp (degC)	Salinity	O (umolkg) Cal	O Sat (%) Cal	Fluor (ugl)
	2013-10-16	2	28.2496	33.2907	205.405	1.00569	0.0621		2014-08-05	4	29.1822	33.3771	200.459	0.995391	0.0476		2014-08-06	3	29.0887	33.3351	197.917	0.972283	0.0481		2015-04-24	3	27.0128	33.8659	155.104	0.656354	0.0361		2015-04-25	3	27.0372	33.8818	213.268	1.01656	0.0163
	2013-10-16	3	28.243	33.2905	205.11	1.00381	0.0585		2014-08-05	5	29.1745	33.3778	200.215	0.993857	0.0487		2014-08-06	4	29.09	33.3351	198.376	0.975132	0.0474		2015-04-24	4	27.0193	33.9128	197.034	0.920512	0.0298		2015-04-25	4	27.0424	33.8821	213.59	1.01856	0.0144
	2013-10-16	4	28.2424	33.2909	206.333	1.01163	0.0562		2014-08-05	6	29.1802	33.3775	200.882	0.998055	0.0461		2014-08-06	5	29.0902	33.3352	197.851	0.971878	0.0492		2015-04-24	5	27.0265	33.9228	206.247	0.978558	0.031		2015-04-25	5	27.0391	33.8816	213.673	1.01907	0.0084
	2013-10-16	5	28.2459	33.2906	204.7	1.00118	0.0502		2014-08-05	7	29.1807	33.3774	200.656	0.99663	0.0475		2014-08-06	6	29.0892	33.3352	198.335	0.974876	0.0473		2015-04-24	6	27.0275	33.9217	204.287	0.966207	0.0303		2015-04-25	6	27.0265	33.882	214.717	1.02554	0.0095
	2013-10-16	6	28.2463	33.2908	204.766	1.0016	0.0606		2014-08-05	8	29.1811	33.3773	200.672	0.996733	0.0471		2014-08-06	7	29.0872	33.3353	198.236	0.974266	0.0455		2015-04-24	7	27.0262	33.9215	204.661	0.968562	0.0309		2015-04-25	7	27.0309	33.8817	214.199	1.02233	0.0104
	2013-10-16	7	28.2275	33.2908	205.298	1.005	0.0503		2014-08-05	9	29.1817	33.3773	200.466	0.995436	0.0517		2014-08-06	8	29.0898	33.3351	198.239	0.974284	0.0497		2015-04-24	8	27.0271	33.9215	204.986	0.970613	0.0301		2015-04-25	8	27.0379	33.8824	214.074	1.02156	0.0136
	2013-10-16	8	28.218	33.2908	204.91	1.00253	0.0592		2014-08-05	10	29.1811	33.3772	200.725	0.997066	0.0498		2014-08-06	9	29.09	33.3351	198.676	0.97699	0.0602		2015-04-24	9	27.026	33.9214	204.972	0.970525	0.0324		2015-04-25	9	27.0345	33.8817	214.401	1.02359	0.0144
	2013-10-16	9	28.1782	33.2902	205.165	1.00415	0.0596		2014-08-05	11	29.1812	33.3774	200.451	0.99534	0.047		2014-08-06	10	29.0909	33.3349	198.357	0.975014	0.0571		2015-04-24	10	27.0255	33.9214	205.21	0.972025	0.0342		2015-04-25	10	27.0325	33.8819	214.851	1.02638	0.016
	2013-10-16	10	28.1605	33.2903	205.081	1.00362	0.0724		2014-08-05	12	29.1836	33.3776	201.464	1.00173	0.0447		2014-08-06	11	29.0913	33.335	198.277	0.974515	0.0483		2015-04-24	11	27.0248	33.9215	204.956	0.970425	0.0319		2015-04-25	11	27.0325	33.882	214.956	1.02702	0.0187
	2013-10-16	11	28.1404	33.2905	205.439	1.00591	0.0673		2014-08-05	13	29.1843	33.3776	200.838	0.997779	0.0454		2014-08-06	12	29.0907	33.3362	198.374	0.97512	0.0463		2015-04-24	12	27.0231	33.9215	205.355	0.972939	0.0316		2015-04-25	12	27.0336	33.8819	213.684	1.01914	0.0219
	2013-10-16	12	28.1356	33.2904	206.024	1.00965	0.0665		2014-08-05	14	29.1844	33.3778	201.254	1.0004	0.0498		2014-08-06	13	29.0901	33.3371	198.404	0.975307	0.0455		2015-04-24	13	27.021	33.9215	204.753	0.969142	0.0333		2015-04-25	13	27.0313	33.8818	213.884	1.02038	0.0207
	2013-10-16	13	28.1201	33.2904	206.398	1.01205	0.0672		2014-08-05	15	29.1841	33.3777	201.249	1.00037	0.0458		2014-08-06	14	29.0884	33.3362	198.143	0.973686	0.0451		2015-04-24	14	27.0207	33.9215	205.085	0.971234	0.0302		2015-04-25	14	27.0283	33.8811	214.36	1.02333	0.0186
	2013-10-16	14	28.081	33.2904	205.887	1.00878	0.0826		2014-08-05	16	29.1775	33.3777	201.029	0.998985	0.0467		2014-08-06	15	29.0885	33.3351	198.443	0.975544	0.0432		2015-04-24	15	27.0174	33.9214	205.314	0.972681	0.0327		2015-04-25	15	27.0136	33.8814	214.703	1.02546	0.0207
	2013-10-16	15	28.0811	33.2904	205.771	1.00804	0.0878		2014-08-05	17	29.1648	33.3782	201.02	0.998928	0.0547		2014-08-06	16	29.0902	33.3347	198.771	0.977582	0.0454		2015-04-24	16	27.0165	33.9216	205.663	0.974878	0.0329		2015-04-25	16	27.018	33.8803	214.073	1.02155	0.0202
	2013-10-16	16	28.0758	33.2904	205.807	1.00826	0.0827		2014-08-05	18	29.1534	33.379	201.379	1.00119	0.0487		2014-08-06	17	29.0867	33.3347	198.519	0.976017	0.0463		2015-04-24	17	27.0148	33.9215	205.533	0.974058	0.0423		2015-04-25	17	26.9923	33.8796	213.593	1.01857	0.0235
	2013-10-16	17	28.0712	33.2906	206.993	1.01586	0.0928		2014-08-05	19	28.9785	33.3922	201.853	1.00417	0.051		2014-08-06	18	29.086	33.3347	198.271	0.974477	0.0487		2015-04-24	18	27.0061	33.9213	205.24	0.972212	0.0353		2015-04-25	18	26.9885	33.8796	214.488	1.02412	0.0258
	2013-10-16	18	28.0676	33.2907	206.708	1.01403	0.0625		2014-08-05	20	28.6981	33.4202	203.364	1.01369	0.0691		2014-08-06	19	29.087	33.3348	198.338	0.974895	0.048		2015-04-24	19	26.9983	33.921	205.673	0.974937	0.0324		2015-04-25	19	26.9787	33.8791	214.635	1.02504	0.0284
	2013-10-16	19	28.0655	33.2904	205.335	1.00524	0.0553		2014-08-05	21	28.451	33.446	206.498	1.03344	0.0663		2014-08-06	20	29.0894	33.3347	198.306	0.974696	0.0482		2015-04-24	20	26.9818	33.9207	205.99	0.976935	0.0323		2015-04-25	20	26.9782	33.8788	214.862	1.02644	0.0324
	2013-10-16	20	28.0625	33.2905	205.969	1.0093	0.0595		2014-08-05	22	28.3508	33.4532	207	1.0366	0.065		2014-08-06	21	29.0865	33.3347	198.346	0.974945	0.0494		2015-04-24	21	26.9463	33.921	205.531	0.974046	0.0322		2015-04-25	21	26.973	33.8789	214.901	1.02669	0.0271
	2013-10-16	21	28.0602	33.2906	205.085	1.00365	0.072		2014-08-05	23	28.3337	33.4535	207.039	1.03684	0.0659		2014-08-06	22	29.0827	33.3352	198.09	0.973355	0.0458		2015-04-24	22	26.935	33.9217	206.604	0.980807	0.0334		2015-04-25	22	26.9315	33.876	215.227	1.02871	0.0296
	2013-10-16	22	28.0586	33.2905	206.295	1.01139	0.0675		2014-08-05	24	28.2774	33.4612	206.772	1.03516	0.0659		2014-08-06	23	29.0911	33.3384	198.219	0.97416	0.0477		2015-04-24	23	26.9228	33.9207	206.306	0.978927	0.0339		2015-04-25	23	26.8409	33.8858	214.984	1.0272	0.0356
	2013-10-16	23	28.0572	33.2905	206.958	1.01563	0.0645		2014-08-05	25	28.2223	33.4709	206.627	1.03425	0.07		2014-08-06	24	29.0899	33.3384	198.961	0.97876	0.0467		2015-04-24	24	26.9134	33.9212	205.851	0.976062	0.0333		2015-04-25	24	26.6654	33.9048	215.417	1.02988	0.0349
	2013-10-16	24	28.0559	33.2903	205.373	1.00549	0.0625		2014-08-05	26	28.1768	33.4776	206.847	1.03564	0.0703		2014-08-06	25	29.0892	33.3384	198.74	0.977389	0.0455		2015-04-24	25	26.7672	33.9145	206.677	0.981264	0.0353		2015-04-25	25	26.3644	33.9359	217.109	1.04038	0.0349
	2013-10-16	25	28.0535	33.2904	205.747	1.00788	0.0599		2014-08-05	27	28.1335	33.4824	206.824	1.03549	0.0702		2014-08-06	26	29.0867	33.3399	198.585	0.976429	0.0455		2015-04-24	26	26.4279	33.9352	207.027	0.983467	0.0397		2015-04-25	26	26.0795	33.9574	218.071	1.04634	0.035
	2013-10-16	26	28.0519	33.2903	206.6	1.01334	0.0671		2014-08-05	28	28.1093	33.4868	206.866	1.03575	0.0712		2014-08-06	27	29.0875	33.338	198.415	0.975375	0.0468		2015-04-24	27	26.2183	33.9643	209.015	0.995994	0.0419		2015-04-25	27	25.7931	33.9753	219.768	1.05686	0.0359
	2013-10-16	27	28.0502	33.2904	206.222	1.01092	0.0758		2014-08-05	29	28.0919	33.4908	206.626	1.03424	0.0725		2014-08-06	28	29.0813	33.3457	198.12	0.973542	0.0466		2015-04-24	28	25.7838	34.005	209.879	1.00144	0.0438		2015-04-25	28	25.4966	33.9948	222.024	1.07085	0.0356
	2013-10-16	28	28.049	33.2904	206.044	1.00978	0.0823		2014-08-05	30	28.0495	33.4968	206.897	1.03595	0.0746		2014-08-06	29	29.0614	33.354	198.493	0.975855	0.0433		2015-04-24	29	25.2	34.0888	213.216	1.02246	0.0472		2015-04-25	29	25.447	34.0386	221.718	1.06895	0.0361
	2013-10-16	29	28.0473	33.2906	205.41	1.00572	0.0711		2014-08-05	31	27.9582	33.5081	207.153	1.03756	0.0785		2014-08-06	30	28.9625	33.3759	199.022	0.979134	0.0486		2015-04-24	30	25.0156	34.1009	215.448	1.03652	0.0489		2015-04-25	30	25.3776	34.0813	221.653	1.06855	0.0381
	2013-10-16	30	28.0457	33.2908	206.338	1.01166	0.0861		2014-08-05	32	27.8699	33.5196	207.076	1.03708	0.0908		2014-08-06	31	28.7812	33.4063	199.557	0.982451	0.0522		2015-04-24	31	24.9353	34.1143	215.911	1.03944	0.0471		2015-04-25	31	25.2695	34.1505	223.448	1.07968	0.043
	2013-10-16	31	28.0444	33.2908	205.864	1.00863	0.0786		2014-08-05	33	27.7718	33.5304	206.684	1.03461	0.096		2014-08-06	32	28.4366	33.4478	201.737	0.995966	0.0578		2015-04-24	32	24.8227	34.1251	216.253	1.04159	0.0452		2015-04-25	32	25.0448	34.3048	223.514	1.08009	0.0456
	2013-10-16	32	28.0431	33.2909	206.792	1.01457	0.0785		2014-08-05	34	27.7405	33.5315	207.426	1.03928	0.1011		2014-08-06	33	28.1507	33.4801	204.788	1.01489	0.0696		2015-04-24	33	24.7693	34.1389	216.062	1.04039	0.0479		2015-04-25	33	24.881	34.371	223.679	1.08111	0.0491
	2013-10-16	33	28.0411	33.2911	206.05	1.00982	0.0834		2014-08-05	35	27.699	33.5331	207.484	1.03965	0.101		2014-08-06	34	28.072	33.4904	205.034	1.01641	0.0682		2015-04-24	34	24.7427	34.1414	215.948	1.03967	0.0506		2015-04-25	34	24.843	34.3695	226.798	1.10044	0.0501
	2013-10-16	34	28.0391	33.2913	205.653	1.00728	0.0901		2014-08-05	36	27.4934	33.5573	207.155	1.03758	0.1057		2014-08-06	35	28.0267	33.4955	204.241	1.0115	0.0691		2015-04-24	35	24.6604	34.1616	216.179	1.04113	0.0517		2015-04-25	35	24.5635	34.362	226.827	1.10063	0.0501
	2013-10-16	35	28.0342	33.2916	206.804	1.01464	0.0603		2014-08-05	37	27.0938	33.6069	207.266	1.03828	0.1141		2014-08-06	36	27.9985	33.4992	204.608	1.01377	0.0716		2015-04-24	36	24.5744	34.1907	215.859	1.03911	0.0533		2015-04-25	36	24.3947	34.3702	225.929	1.09506	0.0616
	2013-10-16	36	28.0312	33.2914	205.684	1.00748	0.0707		2014-08-05	38	26.8189	33.6446	206.796	1.03532	0.1262		2014-08-06	37	27.9781	33.5019	204.192	1.01119	0.0731		2015-04-24	37	24.4986	34.208	215.714	1.0382	0.0523		2015-04-25	37	24.2041	34.3198	226.93	1.10126	0.0687
	2013-10-16	37	28.0272	33.2918	206.244	1.01106	0.08		2014-08-05	39	26.7502	33.6526	206.74	1.03496	0.1438		2014-08-06	38	27.9584	33.5054	204.114	1.0107	0.0791		2015-04-24	38	24.4312	34.219	215.129	1.03451	0.0532		2015-04-25	38	23.8735	34.2609	226.176	1.09659	0.0736
	2013-10-16	38	28.0222	33.2922	206.74	1.01423	0.072		2014-08-05	40	26.6539	33.6628	206.236	1.03179	0.1483		2014-08-06	39	27.952	33.506	204.299	1.01185	0.0815		2015-04-24	39	24.361	34.2202	215.209	1.03501	0.0567		2015-04-25	39	23.8504	34.266	223.514	1.08009	0.0903
	2013-10-16	39	28.0197	33.2923	206.337	1.01166	0.0847		2014-08-05	41	26.5296	33.6779	206.095	1.0309	0.1577		2014-08-06	40	27.9226	33.5124	204.041	1.01025	0.0819		2015-04-24	40	24.2568	34.2311	214.372	1.02974	0.0618		2015-04-25	40	23.7344	34.3108	223.007	1.07694	0.1423
	2013-10-16	40	28.0132	33.2933	206.275	1.01126	0.0643		2014-08-05	42	26.4579	33.6874	205.066	1.02441	0.1695		2014-08-06	41	27.8927	33.5158	204.204	1.01126	0.0853		2015-04-24	41	24.2375	34.2338	213.724	1.02566	0.0687		2015-04-25	41	23.6136	34.3359	218.651	1.04994	0.2681
	2013-10-16	41	27.9752	33.2983	206.307	1.01147	0.0913		2014-08-05	43	26.3317	33.7	204.982	1.02389	0.1861		2014-08-06	42	27.8579	33.5202	204.006	1.01004	0.0861		2015-04-24	42	24.2293	34.2336	214.536	1.03078	0.0684		2015-04-25	42	23.5701	34.3294	218.325	1.04791	0.2773
	2013-10-16	42	27.899	33.3102	207.492	1.01905	0.0905		2014-08-05	44	26.1523	33.7302	204.38	1.02009	0.2026		2014-08-06	43	27.8096	33.5272	204.176	1.01109	0.0883		2015-04-24	43	24.1987	34.2311	214.132	1.02823	0.0668		2015-04-25	43	23.5227	34.3232	218.056	1.04625	0.2914
	2013-10-16	43	27.8933	33.3103	206.695	1.01395	0.0956		2014-08-05	45	25.992	33.746	202.429	1.0078	0.2116		2014-08-06	44	27.7373	33.5358	204.756	1.01469	0.0952		2015-04-24	44	24.1348	34.2356	213.209	1.02242	0.0761		2015-04-25	44	23.4718	34.3746	215.166	1.02833	0.333
	2013-10-16	44	27.8834	33.3104	206.084	1.01004	0.1128		2014-08-05	46	25.7612	33.7852	201.467	1.00174	0.2357		2014-08-06	45	27.6383	33.5456	205.022	1.01634	0.0988		2015-04-24	45	24.0127	34.2484	213.293	1.02295	0.0829		2015-04-25	45	23.4905	34.4697	216.478	1.03647	0.2705
	2013-10-16	45	27.811	33.327	206.343	1.0117	0.1262		2014-08-05	47	25.6441	33.8077	200.058	0.992863	0.2373		2014-08-06	46	27.5604	33.5554	204.834	1.01517	0.1015		2015-04-24	46	23.9437	34.2532	212.406	1.01736	0.0974		2015-04-25	46	23.2487	34.452	222.096	1.0713	0.2676
	2013-10-16	46	27.6089	33.3762	206.825	1.01478	0.1386		2014-08-05	48	25.4833	33.8293	200.528	0.995828	0.2391		2014-08-06	47	27.4497	33.5685	204.999	1.0162	0.102		2015-04-24	47	23.8476	34.2477	213.044	1.02138	0.113		2015-04-25	47	23.0822	34.4438	224.109	1.08378	0.2706
	2013-10-16	47	27.4581	33.416	206.328	1.0116	0.1428		2014-08-05	49	25.3669	33.8433	199.11	0.986894	0.2597		2014-08-06	48	27.3615	33.5792	204.625	1.01388	0.1062		2015-04-24	48	23.757	34.2602	211.952	1.0145	0.1543		2015-04-25	48	22.842	34.4043	217.253	1.04127	0.2879
	2013-10-16	48	27.3658	33.4404	207.197	1.01716	0.1344		2014-08-05	50	25.2376	33.8578	197.352	0.975817	0.2709		2014-08-06	49	27.2483	33.5911	205.27	1.01787	0.1127		2015-04-24	49	23.7224	34.26	212.371	1.01714	0.1709		2015-04-25	49	22.5744	34.3427	211.232	1.00394	0.2962
	2013-10-16	49	27.1948	33.4829	207.957	1.02203	0.1274		2014-08-05	51	25.0871	33.8808	195.601	0.964785	0.2735		2014-08-06	50	27.1581	33.6014	205.015	1.0163	0.1161		2015-04-24	50	23.7109	34.2576	212.271	1.01651	0.1725		2015-04-25	50	22.1598	34.3415	203.823	0.958004	0.2734
	2013-10-16	50	26.5677	33.639	208.266	1.024	0.1451		2014-08-05	52	24.8506	33.9213	195.244	0.962539	0.253		2014-08-06	51	27.0986	33.6073	204.456	1.01283	0.1202		2015-04-24	51	23.6078	34.2432	212.45	1.01764	0.1798		2015-04-25	51	21.9921	34.3349	203.307	0.954806	0.2824
	2013-10-16	51	26.152	33.7332	207.717	1.02049	0.1553		2014-08-05	53	24.7033	33.9519	194.704	0.959137	0.2491		2014-08-06	52	26.9077	33.6318	203.969	1.00981	0.1336		2015-04-24	52	23.3377	34.2487	211.311	1.01046	0.2697		2015-04-25	52	21.7763	34.3214	201.716	0.944942	0.2894
	2013-10-16	52	25.7678	33.8182	207.148	1.01685	0.1595		2014-08-05	54	24.5911	33.9817	195.23	0.962449	0.2396		2014-08-06	53	26.6169	33.6712	204.539	1.01334	0.1441		2015-04-24	53	23.2871	34.2538	206.277	0.978745	0.3071		2015-04-25	53	21.5142	34.351	195.622	0.907158	0.3211
	2013-10-16	53	25.5861	33.8537	205.765	1.008	0.1641		2014-08-05	55	24.4328	34.0292	196.751	0.97203	0.2416		2014-08-06	54	26.4771	33.6933	204.659	1.01408	0.1567		2015-04-24	54	23.1306	34.2478	210.963	1.00827	0.2747		2015-04-25	54	21.4962	34.3374	195.321	0.905289	0.2908
	2013-10-16	54	25.2422	33.9171	205.193	1.00433	0.1757		2014-08-05	56	24.2303	34.0512	197.192	0.974809	0.2504		2014-08-06	55	26.3987	33.7051	203.474	1.00674	0.1621		2015-04-24	55	22.893	34.2804	209.851	1.00126	0.3004		2015-04-25	55	21.506	34.3401	186.728	0.852012	0.2936
	2013-10-16	55	24.8545	33.9739	204.654	1.00088	0.1927		2014-08-05	57	24.0145	34.0782	196.47	0.970259	0.2616		2014-08-06	56	26.3095	33.7151	203.742	1.0084	0.1714		2015-04-24	56	22.779	34.2779	203.703	0.962527	0.312		2015-04-25	56	21.4897	34.3726	188.723	0.86438	0.3121
	2013-10-16	56	24.5423	33.9902	203.017	0.990409	0.3222		2014-08-05	58	23.8643	34.0862	193.414	0.951006	0.269		2014-08-06	57	26.1666	33.7277	203.11	1.00448	0.1854		2015-04-24	57	22.9304	34.2749	196.782	0.918925	0.319		2015-04-25	57	21.507	34.4183	190.013	0.872381	0.3269
	2013-10-16	57	23.9129	34.0702	202.722	0.988523	0.3843		2014-08-05	59	23.7346	34.0877	190.045	0.929782	0.2772		2014-08-06	58	25.9688	33.7494	201.279	0.99313	0.2014		2015-04-24	58	22.6223	34.2697	204.527	0.967718	0.2938		2015-04-25	58	21.5173	34.4589	193.537	0.894229	0.3373
	2013-10-16	58	23.6833	34.094	202.925	0.989822	0.5075		2014-08-05	60	23.6937	34.0927	188.953	0.922902	0.2856		2014-08-06	59	25.8374	33.7627	199.729	0.983517	0.2329		2015-04-24	59	22.3822	34.3231	201.289	0.947323	0.2914		2015-04-25	59	21.4552	34.4585	193.886	0.896396	0.3247
	2013-10-16	59	23.4125	34.1129	197.335	0.954044	0.561		2014-08-05	61	23.6267	34.1004	189.372	0.925546	0.2856		2014-08-06	60	25.6608	33.7814	198.565	0.976304	0.2586		2015-04-24	60	22.2981	34.3256	195.059	0.908074	0.2809		2015-04-25	60	21.3084	34.4438	190.761	0.877019	0.2993
	2013-10-16	60	23.1864	34.1314	198.195	0.959549	0.5525		2014-08-05	62	23.5649	34.1107	189.669	0.927414	0.2892		2014-08-06	61	25.4293	33.8102	195.327	0.95623	0.2918		2015-04-24	61	22.1017	34.3004	194.711	0.905877	0.2805		2015-04-25	61	21.1693	34.4333	186.725	0.851992	0.3006
	2013-10-16	61	23.4372	34.089	187.733	0.892594	0.5106		2014-08-05	63	23.433	34.1267	188.837	0.922171	0.2841		2014-08-06	62	25.2652	33.8418	189.942	0.92284	0.2963		2015-04-24	62	21.9429	34.3054	187.293	0.859145	0.2738		2015-04-25	62	21.2182	34.5142	184.208	0.836387	0.2831
	2013-10-16	62	23.0055	34.1325	195.651	0.943265	0.4889		2014-08-05	64	23.3396	34.1366	187.31	0.91255	0.2819		2014-08-06	63	25.1797	33.8557	190.035	0.923414	0.2707		2015-04-24	63	21.8592	34.31	187.023	0.857446	0.2753		2015-04-25	63	21.2909	34.5539	190.769	0.877065	0.2557
	2013-10-16	63	22.5199	34.195	186.009	0.881558	0.4524		2014-08-05	65	23.1488	34.1716	186.815	0.909438	0.271		2014-08-06	64	25.0875	33.8644	191.906	0.935016	0.2643		2015-04-24	64	21.9042	34.41	186.335	0.853111	0.2729		2015-04-25	64	21.1622	34.5816	194.042	0.897361	0.2427
	2013-10-16	64	22.2294	34.2317	178.624	0.834295	0.4189		2014-08-05	66	22.9747	34.2363	184.119	0.89245	0.2507		2014-08-06	65	25.0284	33.8691	188.095	0.911388	0.2658		2015-04-24	65	21.9275	34.4452	192.304	0.890714	0.269		2015-04-25	65	20.9653	34.5815	188.804	0.864882	0.2337
	2013-10-16	65	22.1415	34.2419	173.25	0.799901	0.4006		2014-08-05	67	22.7805	34.2318	184.369	0.894022	0.2389		2014-08-06	66	25.0092	33.8738	186.859	0.903727	0.2763		2015-04-24	66	21.9182	34.4612	194.088	0.901957	0.2815		2015-04-25	66	20.7247	34.5628	183.46	0.831749	0.2165
	2013-10-16	66	22.0598	34.2431	172.518	0.795214	0.3791		2014-08-05	68	22.5961	34.2336	175.105	0.835658	0.2235		2014-08-06	67	25.0059	33.8807	186.666	0.90253	0.272		2015-04-24	67	21.8572	34.5046	191.509	0.885704	0.2825		2015-04-25	67	20.635	34.5972	183.304	0.830785	0.2039
	2013-10-16	67	21.776	34.2569	170.609	0.782998	0.3396		2014-08-05	69	22.2884	34.2473	171.518	0.813061	0.2168		2014-08-06	68	24.9679	33.9001	186.971	0.904419	0.2595		2015-04-24	68	21.731	34.5362	192.938	0.894709	0.257		2015-04-25	68	20.4881	34.5869	179.83	0.809247	0.2007
	2013-10-16	68	21.5805	34.2689	164.364	0.743027	0.3127		2014-08-05	70	21.8977	34.2924	165.18	0.773136	0.2105		2014-08-06	69	24.9718	33.897	190.736	0.927765	0.2414		2015-04-24	69	21.6188	34.5468	192.358	0.891053	0.2351		2015-04-25	69	20.4362	34.5987	180.155	0.811262	0.1971
	2013-10-16	69	21.5316	34.2715	162.196	0.729156	0.2957		2014-08-05	71	21.7744	34.2973	155.009	0.709054	0.1899		2014-08-06	70	24.8722	33.9192	189.38	0.919356	0.2395		2015-04-24	70	21.5808	34.5569	190.773	0.88107	0.2211		2015-04-25	70	20.3799	34.6042	174.422	0.775718	0.1671
	2013-10-16	70	21.5205	34.2687	162.844	0.733302	0.2611		2014-08-05	72	21.6213	34.3027	152.249	0.691668	0.1846		2014-08-06	71	24.823	33.9311	189.85	0.922267	0.2392		2015-04-24	71	21.5345	34.5485	190.123	0.876974	0.2281		2015-04-25	71	20.2596	34.6069	173.459	0.769745	0.1664
	2013-10-16	71	21.3708	34.28	163.303	0.736236	0.2628		2014-08-05	73	21.5118	34.3081	147.306	0.660529	0.1756		2014-08-06	72	24.7284	33.9483	191.972	0.935427	0.2294		2015-04-24	72	21.3939	34.5482	190.395	0.878691	0.2085		2015-04-25	72	20.1242	34.6005	171.04	0.754748	0.1655
	2013-10-16	72	21.1339	34.2977	161.159	0.722517	0.2688		2014-08-05	74	21.4028	34.3134	144.369	0.642027	0.1653		2014-08-06	73	24.5231	33.973	193.701	0.946144	0.2181		2015-04-24	73	21.2518	34.5483	188.321	0.86562	0.2274		2015-04-25	73	20.0474	34.6098	172.21	0.762002	0.1617
	2013-10-16	73	21.0242	34.3034	147.204	0.633206	0.243		2014-08-05	75	21.2734	34.3211	142.021	0.627234	0.1575		2014-08-06	74	24.2875	34.0047	193.046	0.942085	0.221		2015-04-24	74	21.2694	34.5785	186.104	0.851658	0.2317		2015-04-25	74	19.9697	34.6159	168.924	0.741627	0.1527
	2013-10-16	74	20.8719	34.3178	147.106	0.63258	0.2395		2014-08-05	76	21.1656	34.3269	139.496	0.611324	0.1587		2014-08-06	75	24.1592	34.0131	190.258	0.924798	0.2234		2015-04-24	75	21.2293	34.5804	184.855	0.843789	0.2321		2015-04-25	75	19.8551	34.6028	167.807	0.734703	0.152
	2013-10-16	75	20.736	34.3332	147.049	0.632211	0.2345		2014-08-05	77	21.1241	34.3293	137.635	0.599599	0.1637		2014-08-06	76	24.109	34.0154	190.027	0.92337	0.2307		2015-04-24	76	21.02	34.5672	184.591	0.842125	0.2346		2015-04-25	76	19.6285	34.5994	161.316	0.694462	0.1445
	2013-10-16	76	20.7073	34.3352	144.062	0.613099	0.2255		2014-08-05	78	21.107	34.329	136.82	0.594464	0.1578		2014-08-06	77	23.9173	34.0409	189.706	0.921375	0.2242		2015-04-24	77	20.966	34.5644	181.53	0.822837	0.2237		2015-04-25	77	19.6359	34.6164	160.712	0.690716	0.1434
	2013-10-16	77	20.6642	34.3392	143.799	0.611411	0.2264		2014-08-05	79	21.0779	34.329	136.315	0.591288	0.155		2014-08-06	78	23.6785	34.0694	188.335	0.912878	0.2229		2015-04-24	78	20.9495	34.5639	180.064	0.813603	0.2285		2015-04-25	78	19.6109	34.6198	161.185	0.693649	0.1481
	2013-10-16	78	20.5054	34.359	144.017	0.612809	0.1997		2014-08-05	80	21.0434	34.3302	135.831	0.588233	0.1532		2014-08-06	79	23.3766	34.1057	183.795	0.884731	0.2187		2015-04-24	79	20.812	34.5425	181.004	0.819527	0.2383		2015-04-25	79	19.5662	34.6166	161.729	0.697018	0.1456
	2013-10-16	79	20.4417	34.363	144.801	0.617826	0.1802		2014-08-05	81	21.0222	34.331	134.613	0.580563	0.1501		2014-08-06	80	23.1292	34.1294	174.251	0.825557	0.2203		2015-04-24	80	20.5095	34.5638	180.989	0.819433	0.2216		2015-04-25	80	19.5201	34.6144	159.104	0.680746	0.1362
	2013-10-16	80	20.4328	34.3612	141.404	0.596083	0.1981		2014-08-05	82	20.9973	34.3301	133.413	0.573003	0.1523		2014-08-06	81	22.5779	34.1994	174.633	0.827926	0.1922		2015-04-24	81	20.4045	34.5767	174.145	0.776311	0.2178		2015-04-25	81	19.4321	34.6023	158.717	0.678348	0.1364
	2013-10-16	81	20.3663	34.3659	141.029	0.593684	0.1973		2014-08-05	83	20.9484	34.3319	133.488	0.573472	0.1534		2014-08-06	82	22.4676	34.2066	169.56	0.796469	0.1752		2015-04-24	82	20.4319	34.5726	160.404	0.689744	0.1675		2015-04-25	82	19.3711	34.6082	158.452	0.676703	0.1377
	2013-10-16	82	20.2509	34.3814	140.796	0.592194	0.1729		2014-08-05	84	20.9148	34.3344	131.999	0.564095	0.1473		2014-08-06	83	22.3342	34.2143	163.445	0.758559	0.1643		2015-04-24	83	20.2864	34.571	166.691	0.729351	0.1745		2015-04-25	83	19.2966	34.6016	156.812	0.666535	0.1401
	2013-10-16	83	20.167	34.3898	139.652	0.584876	0.176		2014-08-05	85	20.8653	34.3375	130.845	0.556824	0.1464		2014-08-06	84	22.2851	34.212	156.958	0.718337	0.1545		2015-04-24	84	20.1403	34.584	165.556	0.722203	0.1691		2015-04-25	84	19.093	34.6016	157.437	0.670407	0.135
	2013-10-16	84	20.1587	34.3855	139.52	0.584025	0.1852		2014-08-05	86	20.8188	34.3412	130.588	0.555207	0.1421		2014-08-06	85	22.2305	34.2089	152.599	0.691312	0.1517		2015-04-24	85	20.0821	34.5818	162.155	0.700777	0.1655		2015-04-25	85	18.9827	34.6071	153.171	0.64396	0.1299
	2013-10-16	85	19.9377	34.4073	139.934	0.586676	0.1852		2014-08-05	87	20.7416	34.347	129.874	0.550708	0.142		2014-08-06	86	22.1445	34.2136	152.564	0.691094	0.1549		2015-04-24	86	19.8032	34.5924	160.297	0.68907	0.1835		2015-04-25	86	18.8146	34.6041	154.488	0.652126	0.1277
	2013-10-16	86	19.7725	34.4287	139.974	0.586933	0.1869		2014-08-05	88	20.7041	34.3484	129.042	0.545464	0.1458		2014-08-06	87	22.037	34.2223	150.44	0.677928	0.1474		2015-04-24	87	19.6925	34.5884	158.505	0.67778	0.171		2015-04-25	87	18.7133	34.6002	149.448	0.620876	0.1157
	2013-10-16	87	19.7415	34.4323	139.539	0.584151	0.1855		2014-08-05	89	20.6586	34.3518	128.327	0.540959	0.1468		2014-08-06	88	21.9138	34.2431	146.695	0.654712	0.1368		2015-04-24	88	19.606	34.5986	157.093	0.668886	0.1628		2015-04-25	88	18.5291	34.5978	149.774	0.622898	0.1078
	2013-10-16	88	19.7267	34.4332	139.139	0.581593	0.1617		2014-08-05	90	20.5944	34.3557	127.677	0.536864	0.1397		2014-08-06	89	21.8628	34.2577	146.778	0.655223	0.136		2015-04-24	89	19.6182	34.5923	156.023	0.662142	0.1572		2015-04-25	89	18.4018	34.5933	145.726	0.597799	0.1027
	2013-10-16	89	19.7934	34.4232	138.446	0.577156	0.1556		2014-08-05	91	20.4594	34.3661	126.67	0.530524	0.135		2014-08-06	90	21.8223	34.2732	148.258	0.6644	0.1367		2015-04-24	90	19.494	34.6003	156.759	0.666783	0.1559		2015-04-25	90	18.2122	34.5887	145.657	0.597376	0.0974
	2013-10-16	90	19.6805	34.4347	138.85	0.57974	0.1367		2014-08-05	92	20.3032	34.3801	126.131	0.527122	0.1354		2014-08-06	91	21.7939	34.2864	149.181	0.670122	0.1362		2015-04-24	91	19.4549	34.6045	154.972	0.655522	0.1477		2015-04-25	91	18.1325	34.5909	143.475	0.583845	0.0954
	2013-10-16	91	19.6483	34.4371	138.742	0.579048	0.1308		2014-08-05	93	20.2247	34.3891	125.465	0.522931	0.13		2014-08-06	92	21.7835	34.2942	150.197	0.676419	0.1377		2015-04-24	92	19.3079	34.5988	156.422	0.664656	0.1519		2015-04-25	92	18.081	34.5892	142.942	0.580542	0.0869
	2013-10-16	92	19.6341	34.4368	139.57	0.584348	0.1339		2014-08-05	94	20.1703	34.3915	124.835	0.518959	0.1402		2014-08-06	93	21.756	34.3053	151.563	0.684891	0.1348		2015-04-24	93	19.1539	34.602	156.244	0.663537	0.1437		2015-04-25	93	17.9764	34.5911	142.668	0.578844	0.0839
	2013-10-16	93	19.5261	34.4428	139.537	0.584137	0.1506		2014-08-05	95	20.0666	34.4036	124.85	0.519055	0.1248		2014-08-06	94	21.7094	34.3124	152.544	0.690976	0.1356		2015-04-24	94	19.2328	34.608	151.118	0.631242	0.1328		2015-04-25	94	17.9451	34.5938	142.707	0.579082	0.0814
	2013-10-16	94	19.449	34.4444	137.235	0.569403	0.1352		2014-08-05	96	20.0597	34.4021	125.205	0.521288	0.1154		2014-08-06	95	21.6271	34.3186	152.193	0.688794	0.1316		2015-04-24	95	18.9918	34.6025	154.63	0.653371	0.1338		2015-04-25	95	17.9247	34.5876	143.796	0.585834	0.0797
	2013-10-16	95	19.2808	34.456	137.143	0.568816	0.1294		2014-08-05	97	19.9832	34.4077	125.377	0.522373	0.1147		2014-08-06	96	21.3796	34.3092	147.441	0.659331	0.1385		2015-04-24	96	18.9094	34.5993	151.436	0.633246	0.1279		2015-04-25	96	17.8467	34.5901	143.245	0.582418	0.0788
	2013-10-16	96	19.1747	34.4619	135.839	0.56047	0.1473		2014-08-05	98	19.9138	34.4159	125.178	0.521122	0.1129		2014-08-06	97	20.9846	34.327	137.159	0.595588	0.1343		2015-04-24	97	18.8307	34.5985	148.644	0.615657	0.1203		2015-04-25	97	17.8096	34.5955	142.821	0.579789	0.0744
	2013-10-16	97	19.0903	34.467	134.825	0.553983	0.1422		2014-08-05	99	19.8283	34.4269	124.905	0.519402	0.111		2014-08-06	98	20.7719	34.3522	128.572	0.542348	0.129		2015-04-24	98	18.7709	34.5928	148.507	0.614796	0.111		2015-04-25	98	17.7013	34.6117	144.574	0.590657	0.0678
	2013-10-16	98	19.0177	34.4714	134.724	0.553337	0.1367		2014-08-05	100	19.7747	34.4323	125.516	0.523252	0.1032		2014-08-06	99	20.5958	34.3966	124.515	0.517194	0.1141		2015-04-24	99	18.6243	34.5915	148.51	0.614813	0.1119		2015-04-25	99	17.6611	34.6321	148.439	0.614619	0.0624
	2013-10-16	99	18.9694	34.4734	134.363	0.551023	0.1349		2014-08-05	101	19.7472	34.4358	125.328	0.522065	0.1038		2014-08-06	100	20.3912	34.4222	131.95	0.563289	0.1065		2015-04-24	100	18.5801	34.5913	145.728	0.597289	0.106		2015-04-25	100	17.5152	34.6226	151.388	0.632907	0.0544
	2013-10-16	100	19.0092	34.4674	134.704	0.553205	0.1252		2014-08-05	102	19.708	34.4401	125.461	0.522906	0.1025		2014-08-06	101	20.2811	34.4148	135.125	0.582976	0.1019		2015-04-24	101	18.4275	34.5891	145.966	0.598783	0.1046		2015-04-25	101	17.4433	34.618	152.397	0.639163	0.049
	2013-10-16	101	18.8759	34.4764	135.363	0.557424	0.1393		2014-08-05	103	19.6776	34.4429	125.394	0.522482	0.104		2014-08-06	102	19.9812	34.4217	133.533	0.573107	0.0975		2015-04-24	102	18.359	34.5875	143.666	0.584294	0.0978		2015-04-25	102	17.3722	34.623	155.063	0.655693	0.0452
	2013-10-16	102	18.8141	34.4797	135.131	0.555941	0.1249		2014-08-05	104	19.6132	34.4484	125.716	0.52451	0.1013		2014-08-06	103	19.7702	34.4324	128.835	0.543975	0.0892		2015-04-24	103	18.2789	34.5881	143.336	0.582214	0.0956		2015-04-25	103	17.2952	34.6287	156.896	0.667057	0.0423
	2013-10-16	103	18.7827	34.4807	133.264	0.543988	0.1131		2014-08-05	105	19.5216	34.4577	125.837	0.525274	0.099		2014-08-06	104	19.6872	34.4316	123.574	0.511359	0.087		2015-04-24	104	18.2516	34.5889	142.554	0.577292	0.0916		2015-04-25	104	17.2317	34.624	159.658	0.684182	0.0388
	2013-10-16	104	18.7417	34.4809	133.045	0.542591	0.1056		2014-08-05	106	19.3946	34.4738	125.95	0.525986	0.0927		2014-08-06	105	19.6497	34.4356	124.08	0.514494	0.0882		2015-04-24	105	18.1679	34.5895	143.235	0.581581	0.0911		2015-04-25	105	17.1018	34.6249	157.941	0.673532	0.0339
	2013-10-16	105	18.7041	34.4829	132.769	0.540824	0.1081		2014-08-05	107	19.216	34.4872	127.639	0.536627	0.0874		2014-08-06	106	19.6257	34.4379	124.045	0.514276	0.0854		2015-04-24	106	18.1545	34.5963	142.815	0.578933	0.0868		2015-04-25	106	17.088	34.626	158.124	0.674668	0.0338
	2013-10-16	106	18.7037	34.4805	132.388	0.538384	0.1081		2014-08-05	108	19.1044	34.4922	127.438	0.535356	0.0821		2014-08-06	107	19.596	34.4385	124.406	0.516514	0.0853		2015-04-24	107	18.1859	34.5968	145.027	0.592871	0.0818		2015-04-25	107	17.0834	34.6256	159.575	0.683666	0.0293
	2013-10-16	107	18.6569	34.4823	131.337	0.53166	0.0799		2014-08-05	109	18.9885	34.4965	126.242	0.527822	0.0793		2014-08-06	108	19.5147	34.4461	124.292	0.51581	0.0841		2015-04-24	108	18.1735	34.6253	144.246	0.58795	0.0794		2015-04-25	108	17.0566	34.6247	159.705	0.684472	0.0341
	2013-10-16	108	18.6408	34.4829	131.193	0.530737	0.0783		2014-08-05	110	18.9678	34.4961	124.746	0.5184	0.0789		2014-08-06	109	19.4678	34.4464	122.69	0.505879	0.0841		2015-04-24	109	18.0112	34.6157	148.435	0.614339	0.0753		2015-04-25	109	17.0412	34.6232	159.955	0.686018	0.0388
	2013-10-16	109	18.6129	34.4845	130.671	0.527395	0.0891		2014-08-05	111	18.931	34.4947	124.464	0.516623	0.0801		2014-08-06	110	19.2472	34.4646	123.405	0.510311	0.0826		2015-04-24	110	17.9723	34.618	154.291	0.651233	0.074		2015-04-25	110	16.9795	34.619	159.576	0.683673	0.0362
	2013-10-16	110	18.5515	34.4883	130.383	0.525549	0.1106		2014-08-05	112	18.8949	34.4951	124.218	0.515076	0.0804		2014-08-06	111	19.1794	34.471	121.896	0.500954	0.0821		2015-04-24	111	17.9553	34.6194	150.521	0.62748	0.0716		2015-04-25	111	16.9716	34.6195	157.589	0.671351	0.0362
	2013-10-16	111	18.5415	34.4886	130.543	0.526577	0.1119		2014-08-05	113	18.8638	34.4953	123.207	0.508703	0.0802		2014-08-06	112	19.1652	34.4706	122.665	0.505723	0.076		2015-04-24	112	17.9165	34.6206	151.46	0.633398	0.0665		2015-04-25	112	16.8828	34.6108	158.53	0.677185	0.0367
	2013-10-16	112	18.5373	34.4863	130.323	0.525166	0.1135		2014-08-05	114	18.8144	34.4945	122.714	0.505597	0.0795		2014-08-06	113	19.1557	34.471	123	0.507799	0.0754		2015-04-24	113	17.8887	34.6314	151.819	0.63566	0.0647		2015-04-25	113	16.8605	34.6164	157.816	0.672759	0.0359
	2013-10-16	113	18.4399	34.4931	130.266	0.524804	0.1036		2014-08-05	115	18.7599	34.4962	122.631	0.505077	0.0774		2014-08-06	114	19.1371	34.4722	123.277	0.50952	0.0733		2015-04-24	114	17.8504	34.6466	153.051	0.643423	0.0603		2015-04-25	114	16.7793	34.5972	159.181	0.681222	0.0375
	2013-10-16	114	18.3951	34.4966	130.458	0.52603	0.097		2014-08-05	116	18.6434	34.491	122.62	0.505006	0.0752		2014-08-06	115	19.1135	34.4723	123.371	0.510099	0.0745		2015-04-24	115	17.8175	34.646	160.966	0.693283	0.0516		2015-04-25	115	16.6566	34.6122	159.103	0.680739	0.0364
	2013-10-16	115	18.3547	34.499	130.521	0.526432	0.1001		2014-08-05	117	18.5943	34.4877	119.553	0.485682	0.071		2014-08-06	116	19.0869	34.4728	123.101	0.508429	0.0756		2015-04-24	116	17.6581	34.6479	160.341	0.689346	0.0505		2015-04-25	116	16.6654	34.6164	158.317	0.675864	0.0348
	2013-10-16	116	18.3421	34.4957	130.431	0.525858	0.0955		2014-08-05	118	18.532	34.4915	118.062	0.476293	0.0655		2014-08-06	117	19.0584	34.4741	122.99	0.507737	0.0763		2015-04-24	117	17.5869	34.6477	161.762	0.698298	0.0462		2015-04-25	117	16.5831	34.6143	158.667	0.678037	0.0322
	2013-10-16	117	18.289	34.5012	130.744	0.527863	0.1035		2014-08-05	119	18.5351	34.4982	116.487	0.466371	0.0687		2014-08-06	118	19.0256	34.4755	123.171	0.508859	0.0771		2015-04-24	118	17.5524	34.6439	161.987	0.699716	0.0437		2015-04-25	118	16.5599	34.6145	162.859	0.704028	0.0279
	2013-10-16	118	18.2424	34.5036	130.308	0.525074	0.1111		2014-08-05	120	18.5357	34.5042	117.167	0.470652	0.0738		2014-08-06	119	18.9746	34.4801	123.236	0.509264	0.0772		2015-04-24	119	17.5283	34.6428	160.459	0.69009	0.0437		2015-04-25	119	16.306	34.6008	161.386	0.694891	0.029
	2013-10-16	119	18.1489	34.5096	129.587	0.520459	0.1078		2014-08-05	121	18.5256	34.5084	119.056	0.482551	0.0742		2014-08-06	120	19.0016	34.475	124.347	0.516153	0.0734		2015-04-24	120	17.5234	34.6417	159.358	0.683159	0.0452		2015-04-25	120	16.1499	34.5937	160.552	0.689725	0.0245
	2013-10-16	120	18.0724	34.5139	130.027	0.523274	0.0893		2014-08-05	122	18.5081	34.5095	120.5	0.491651	0.071		2014-08-06	121	18.8216	34.4893	123.53	0.511084	0.0729		2015-04-24	121	17.5209	34.6411	159.811	0.686012	0.0469		2015-04-25	121	16.0864	34.5977	160.891	0.691826	0.0263
	2013-10-16	121	18.1016	34.5093	129.351	0.518949	0.0733		2014-08-05	123	18.4477	34.5108	121.146	0.49572	0.0694		2014-08-06	122	18.5826	34.5096	123.395	0.510249	0.0731		2015-04-24	122	17.5128	34.6397	159.672	0.685133	0.0471		2015-04-25	122	15.9938	34.5885	161.27	0.694171	0.0264
	2013-10-16	122	17.962	34.5188	129.584	0.520439	0.0901		2014-08-05	124	18.3724	34.5053	120.14	0.489379	0.0667		2014-08-06	123	18.5034	34.5127	120.982	0.495287	0.0705		2015-04-24	123	17.4834	34.6362	159.591	0.684623	0.0459		2015-04-25	123	15.89	34.5913	160.195	0.687511	0.0228
	2013-10-16	123	17.887	34.522	129.199	0.517974	0.0956		2014-08-05	125	18.3263	34.5	117.094	0.47019	0.0671		2014-08-06	124	18.424	34.5144	119.186	0.484153	0.0676		2015-04-24	124	17.4617	34.6383	159.204	0.682186	0.0434		2015-04-25	124	15.8348	34.5883	160.208	0.687591	0.0225
	2013-10-16	124	17.7931	34.5244	129.346	0.518916	0.0917		2014-08-05	126	18.3153	34.4989	115.835	0.462257	0.0671		2014-08-06	125	18.4333	34.5073	118.602	0.480531	0.0697		2015-04-24	125	17.3818	34.6332	159.699	0.685303	0.0411		2015-04-25	125	15.805	34.5885	160.669	0.690445	0.0233
	2013-10-16	125	17.6645	34.5285	129.176	0.517829	0.0709		2014-08-05	127	18.2984	34.4986	115.036	0.457226	0.0645		2014-08-06	126	18.2373	34.5173	118.935	0.482595	0.0664		2015-04-24	126	17.313	34.6358	159.604	0.684705	0.0417		2015-04-25	126	15.7744	34.5858	160.791	0.691205	0.0213
	2013-10-16	126	17.5895	34.5304	127.345	0.506107	0.052		2014-08-05	128	18.2658	34.4992	114.452	0.453548	0.0634		2014-08-06	127	18.1723	34.5181	117.985	0.47671	0.0644		2015-04-24	127	17.2989	34.6357	159.439	0.683668	0.0395		2015-04-25	127	15.7118	34.5837	159.327	0.682127	0.0216
	2013-10-16	127	17.5486	34.53	126.452	0.500391	0.0776		2014-08-05	129	18.1197	34.4981	114.675	0.454954	0.0632		2014-08-06	128	18.1015	34.5211	117.163	0.47161	0.0625		2015-04-24	128	17.2706	34.6319	159.346	0.683082	0.0387		2015-04-25	128	15.6241	34.571	158.998	0.680085	0.0234
	2013-10-16	128	17.5113	34.5294	126.909	0.503318	0.0821		2014-08-05	130	18.0357	34.5074	112.765	0.442921	0.0605		2014-08-06	129	18.0771	34.5224	117.188	0.471766	0.0604		2015-04-24	129	17.2261	34.6273	159.612	0.684758	0.0387		2015-04-25	129	15.5118	34.573	159.299	0.681955	0.0217
	2013-10-16	129	17.497	34.5295	126.595	0.501307	0.0706		2014-08-05	131	18.0052	34.5192	111.591	0.435521	0.0618		2014-08-06	130	18.3483	34.4978	116.937	0.470207	0.0662		2015-04-24	130	17.1708	34.6255	159.569	0.684483	0.0357		2015-04-25	130	15.4719	34.5716	156.915	0.667176	0.0207
	2013-10-16	130	17.4844	34.5298	126.632	0.501545	0.0631		2014-08-05	132	17.9407	34.5251	113.253	0.445995	0.0626		2014-08-06	131	18.0818	34.5066	117.486	0.473611	0.0649		2015-04-24	131	17.1723	34.6252	157.391	0.670761	0.0351		2015-04-25	131	15.4319	34.5693	157.251	0.669257	0.02
	2013-10-16	131	17.4579	34.5308	127.01	0.503964	0.0699		2014-08-05	133	17.9053	34.5264	119.221	0.48359	0.0571		2014-08-06	132	17.8629	34.5262	117.718	0.475051	0.0593		2015-04-24	132	17.0909	34.62	158.307	0.676532	0.0378		2015-04-25	132	15.3977	34.5681	156.688	0.665769	0.0215
	2013-10-16	132	17.4132	34.5323	127.479	0.506964	0.0721		2014-08-05	134	17.875	34.5247	118.69	0.480247	0.0561		2014-08-06	133	17.8308	34.5268	116.788	0.469285	0.0575		2015-04-24	133	17.0446	34.6195	157.558	0.671816	0.037		2015-04-25	133	15.36	34.5657	156.63	0.665405	0.0227
	2013-10-16	133	17.3822	34.5325	126.557	0.501064	0.0581		2014-08-05	135	17.8103	34.5188	118.288	0.477712	0.0558		2014-08-06	134	17.9622	34.5158	114.933	0.457783	0.0577		2015-04-24	134	17.0253	34.6237	155.735	0.660332	0.0412		2015-04-25	134	15.3287	34.5659	156.306	0.663397	0.0227
	2013-10-16	134	17.3497	34.534	127.029	0.504083	0.0721		2014-08-05	136	17.733	34.517	117.241	0.47112	0.0571		2014-08-06	135	18.0316	34.513	116.928	0.470151	0.0553		2015-04-24	135	16.9227	34.6032	156.877	0.667527	0.0421		2015-04-25	135	15.308	34.565	155.883	0.660774	0.0211
	2013-10-16	135	17.2893	34.5365	127.863	0.509423	0.0739		2014-08-05	137	17.7054	34.5181	114.899	0.456366	0.0558		2014-08-06	136	17.8245	34.5078	117.015	0.470694	0.0509		2015-04-24	136	16.7931	34.6183	155.476	0.658697	0.0383		2015-04-25	136	15.2974	34.5644	155.758	0.660001	0.0209
	2013-10-16	136	17.1635	34.5446	128.56	0.513886	0.07		2014-08-05	138	17.6842	34.522	113.121	0.44516	0.0537		2014-08-06	137	17.6441	34.5218	115.978	0.464266	0.0488		2015-04-24	137	16.6917	34.6141	157.571	0.671898	0.0346		2015-04-25	137	15.2753	34.5634	155.301	0.657167	0.0197
	2013-10-16	137	17.1236	34.5428	132.373	0.538286	0.0771		2014-08-05	139	17.6473	34.5281	114.612	0.454556	0.0521		2014-08-06	138	17.5796	34.5245	112.464	0.442478	0.05		2015-04-24	138	16.5959	34.6071	159.185	0.682063	0.0331		2015-04-25	138	15.2326	34.5614	155.506	0.658435	0.02
	2013-10-16	138	17.0336	34.5479	130.674	0.527414	0.057		2014-08-05	140	17.6359	34.5282	115.729	0.46159	0.0516		2014-08-06	139	17.5417	34.5233	112.709	0.443993	0.0498		2015-04-24	139	16.5009	34.5999	157.109	0.668986	0.0298		2015-04-25	139	15.1897	34.5599	156.057	0.661851	0.0187
	2013-10-16	139	16.9747	34.5516	131.211	0.530849	0.0668		2014-08-05	141	17.6082	34.5274	116.706	0.467745	0.05		2014-08-06	140	17.4538	34.5256	112.736	0.444161	0.0475		2015-04-24	140	16.4349	34.6058	156.5	0.665148	0.0302		2015-04-25	140	15.153	34.5615	154.866	0.654471	0.0197
	2013-10-16	140	16.8863	34.5557	131.975	0.535741	0.0629		2014-08-05	142	17.5543	34.5255	115.892	0.462617	0.0527		2014-08-06	141	17.4357	34.5253	111.765	0.438145	0.0448		2015-04-24	141	16.3763	34.607	156.343	0.664158	0.0274		2015-04-25	141	15.0759	34.5574	154.251	0.650659	0.0208
	2013-10-16	141	16.8518	34.5556	132.61	0.539802	0.0594		2014-08-05	143	17.4362	34.5225	115.463	0.459915	0.0487		2014-08-06	142	17.41	34.524	110.865	0.432566	0.0455		2015-04-24	142	16.2761	34.5961	155.074	0.656166	0.029		2015-04-25	142	15.0177	34.5572	152.522	0.639936	0.0194
	2013-10-16	142	16.7906	34.5557	132.957	0.542024	0.0607		2014-08-05	144	17.4153	34.5226	114.17	0.451771	0.0449		2014-08-06	143	17.3043	34.5229	110.014	0.427286	0.0419		2015-04-24	143	16.1805	34.5935	152.459	0.639691	0.0304		2015-04-25	143	14.9206	34.5515	152.178	0.637802	0.0191
	2013-10-16	143	16.6964	34.5582	132.245	0.537468	0.0589		2014-08-05	145	17.4034	34.5235	112.661	0.442266	0.0441		2014-08-06	144	17.2825	34.5194	107.135	0.409437	0.0391		2015-04-24	144	16.1305	34.5935	150.091	0.624774	0.027		2015-04-25	144	14.8831	34.5525	149.569	0.621629	0.0205
	2013-10-16	144	16.6751	34.5573	131.773	0.534449	0.0629		2014-08-05	146	17.3925	34.5224	111.23	0.433249	0.0467		2014-08-06	145	17.2244	34.5214	108.679	0.419007	0.0418		2015-04-24	145	16.133	34.5977	149.561	0.621434	0.0273		2015-04-25	145	14.858	34.5501	148.419	0.614501	0.0195
	2013-10-16	145	16.6264	34.5572	132.153	0.536881	0.0753		2014-08-05	147	17.314	34.5261	111.752	0.436535	0.0484		2014-08-06	146	17.2126	34.5209	108.242	0.416301	0.0421		2015-04-24	146	16.1478	34.6036	154.618	0.653295	0.0274		2015-04-25	146	14.7943	34.5468	148.175	0.612988	0.0194
	2013-10-16	146	16.5533	34.5601	132.688	0.540303	0.068		2014-08-05	148	17.2419	34.527	111.949	0.43778	0.0443		2014-08-06	147	17.1974	34.5214	106.696	0.406713	0.041		2015-04-24	147	16.1479	34.6083	159.017	0.681008	0.0263		2015-04-25	147	14.6621	34.5371	145.059	0.593663	0.0213
	2013-10-16	147	16.5188	34.5605	132.414	0.538549	0.0555		2014-08-05	149	17.2119	34.5263	112.405	0.440649	0.0412		2014-08-06	148	17.1948	34.5194	107.305	0.410491	0.0403		2015-04-24	148	16.1125	34.598	158.658	0.678747	0.0234		2015-04-25	148	14.5663	34.5375	142.888	0.580205	0.0216
	2013-10-16	148	16.5299	34.5564	131.526	0.532866	0.0432		2014-08-05	150	17.1976	34.5261	111.844	0.437119	0.0414		2014-08-06	149	17.1119	34.5226	107.997	0.41478	0.0377		2015-04-24	149	15.9896	34.5926	160.261	0.688842	0.0246		2015-04-25	149	14.5468	34.5377	140.735	0.566859	0.022
	2013-10-16	149	16.4605	34.558	131.652	0.533671	0.0512		2014-08-05	151	17.1716	34.5259	111.469	0.434757	0.0423		2014-08-06	150	17.0685	34.5263	108.022	0.414936	0.0393		2015-04-24	150	15.909	34.5889	155.557	0.659207	0.0232		2015-04-25	150	14.5384	34.536	140.377	0.56464	0.0209
	2013-10-16	150	16.3785	34.5597	131.838	0.534864	0.0455		2014-08-05	152	17.1525	34.5254	110.694	0.429873	0.044		2014-08-06	151	17.0752	34.5252	108.056	0.415148	0.0403		2015-04-24	151	15.8913	34.5881	153.428	0.645796	0.0233		2015-04-25	151	14.5071	34.5343	140.368	0.56458	0.0206
	2013-10-16	151	16.3313	34.5601	131.355	0.531772	0.0468		2014-08-05	153	17.0705	34.5247	110.595	0.429251	0.0405		2014-08-06	152	17.1357	34.5213	107.983	0.414693	0.0388		2015-04-24	152	15.8898	34.5875	152.173	0.637892	0.0219		2015-04-25	152	14.4868	34.5336	139.897	0.56166	0.0204
	2013-10-16	152	16.2581	34.5597	131.805	0.534653	0.0523		2014-08-05	154	17.0437	34.5261	110.176	0.426606	0.0388		2014-08-06	153	16.9609	34.52	108.238	0.416276	0.0382		2015-04-24	153	15.8889	34.5874	152.206	0.638097	0.021		2015-04-25	153	14.473	34.5327	139.483	0.559097	0.021
	2013-10-16	153	16.1908	34.5602	131.279	0.531284	0.0521		2014-08-05	155	17.0254	34.5252	109.823	0.424386	0.04		2014-08-06	154	16.8859	34.5273	108.191	0.415983	0.0387		2015-04-24	154	15.8803	34.5845	152.293	0.638648	0.023		2015-04-25	154	14.4308	34.5289	139.547	0.559493	0.0229
	2013-10-16	154	16.1491	34.5591	131.318	0.531535	0.0547		2014-08-05	156	16.9905	34.5251	109.598	0.422968	0.0408		2014-08-06	155	16.8629	34.5267	107.791	0.413502	0.0393		2015-04-24	155	15.8403	34.584	151.739	0.635156	0.0247		2015-04-25	155	14.37	34.5199	139.64	0.560068	0.0216
	2013-10-16	155	16.0954	34.5601	131.873	0.535088	0.0506		2014-08-05	157	17.002	34.5235	108.295	0.414759	0.0376		2014-08-06	156	16.8441	34.5262	107.235	0.410055	0.0379		2015-04-24	156	15.8052	34.5817	151.895	0.63614	0.0241		2015-04-25	156	14.2516	34.5259	139.74	0.560689	0.0221
	2013-10-16	156	16.0781	34.5588	131.945	0.53555	0.0353		2014-08-05	158	16.9648	34.5234	108.749	0.417622	0.0395		2014-08-06	157	16.883	34.5239	106.785	0.407268	0.0346		2015-04-24	157	15.7758	34.58	152.317	0.6388	0.0234		2015-04-25	157	14.231	34.5153	142.48	0.577675	0.0217
	2013-10-16	157	16.0049	34.5594	132.041	0.536163	0.0349		2014-08-05	159	16.9176	34.5249	109.073	0.419662	0.0404		2014-08-06	158	16.8729	34.5236	106.923	0.408122	0.0351		2015-04-24	158	15.7126	34.5806	152.347	0.638988	0.022		2015-04-25	158	14.171	34.5251	141.32	0.570487	0.0208
	2013-10-16	158	15.9026	34.5611	132.847	0.541318	0.0535		2014-08-05	160	16.8474	34.5261	108.668	0.417108	0.039		2014-08-06	159	16.7989	34.5251	106.607	0.406164	0.0377		2015-04-24	159	15.6688	34.5816	155.178	0.656822	0.019		2015-04-25	159	14.198	34.5247	141.124	0.569271	0.0221
	2013-10-16	159	15.8593	34.5607	134.447	0.551563	0.0593		2014-08-05	161	16.82	34.5265	108.426	0.415581	0.0374		2014-08-06	160	16.7421	34.5251	106.345	0.404537	0.0351		2015-04-24	160	15.63	34.5789	155.838	0.660976	0.0198		2015-04-25	160	14.1377	34.5237	141.261	0.570117	0.0212
	2013-10-16	160	15.8333	34.5599	134.927	0.554635	0.0586		2014-08-05	162	16.8034	34.5247	108.467	0.415844	0.0351		2014-08-06	161	16.7392	34.5219	106.193	0.403596	0.0344		2015-04-24	161	15.6163	34.5779	155.259	0.657332	0.0253		2015-04-25	161	14.1281	34.5232	140.693	0.566595	0.0191
	2013-10-16	161	15.8181	34.5578	134.46	0.551642	0.0466		2014-08-05	163	16.749	34.527	108.406	0.415459	0.0375		2014-08-06	162	16.6658	34.5266	106.111	0.403091	0.0327		2015-04-24	162	15.5843	34.5751	154.66	0.653559	0.0328		2015-04-25	162	14.1234	34.5222	138.975	0.555945	0.0205
	2013-10-16	162	15.7556	34.5602	134.694	0.553139	0.0576		2014-08-05	164	16.7247	34.5274	108.355	0.415138	0.0385		2014-08-06	163	16.6284	34.5268	105.834	0.40137	0.0325		2015-04-24	163	15.5346	34.5765	154.651	0.6535	0.0268		2015-04-25	163	14.0972	34.5199	139.802	0.561072	0.0215
	2013-10-16	163	15.7065	34.5596	134.65	0.552862	0.0652		2014-08-05	165	16.7009	34.5275	108.4	0.41542	0.0366		2014-08-06	164	16.6011	34.525	106	0.402399	0.0326		2015-04-24	164	15.4869	34.5708	154.761	0.654192	0.0242		2015-04-25	164	14.0557	34.52	138.554	0.553336	0.021
	2013-10-16	164	15.6296	34.5588	135.299	0.557015	0.0669		2014-08-05	166	16.692	34.5264	108.032	0.413103	0.035		2014-08-06	165	16.606	34.5254	105.878	0.401645	0.0343		2015-04-24	165	15.4178	34.5672	154.478	0.652411	0.024		2015-04-25	165	14.0048	34.5171	137.385	0.546088	0.0189
	2013-10-16	165	15.5832	34.5581	135.797	0.5602	0.0548		2014-08-05	167	16.6453	34.5269	108.279	0.414657	0.0341		2014-08-06	166	16.5246	34.5262	105.987	0.402318	0.0348		2015-04-24	166	15.3177	34.5585	154.176	0.650506	0.0197		2015-04-25	166	13.9449	34.5151	136.485	0.540505	0.0187
	2013-10-16	166	15.5467	34.5587	136.042	0.561769	0.05		2014-08-05	168	16.572	34.528	108.194	0.414124	0.0326		2014-08-06	167	16.492	34.5291	105.74	0.400791	0.0331		2015-04-24	167	15.2643	34.5626	153.217	0.644466	0.0204		2015-04-25	167	13.9062	34.5154	135.924	0.53703	0.0196
	2013-10-16	167	15.5619	34.5572	135.409	0.557721	0.0569		2014-08-05	169	16.5043	34.5297	108.076	0.413379	0.0313		2014-08-06	168	16.4935	34.5277	106.445	0.405161	0.0304		2015-04-24	168	15.2303	34.5621	152.118	0.63754	0.0208		2015-04-25	168	13.8653	34.5118	135.905	0.536911	0.0186
	2013-10-16	168	15.4982	34.5575	135.397	0.557642	0.0322		2014-08-05	170	16.4578	34.5303	108.086	0.413444	0.0327		2014-08-06	169	16.4591	34.5271	106.269	0.40407	0.0326		2015-04-24	169	15.1673	34.5572	152.712	0.641284	0.0213		2015-04-25	169	13.8	34.5132	135.802	0.53627	0.0196
	2013-10-16	169	15.4629	34.5569	135.575	0.558782	0.0415		2014-08-05	171	16.4228	34.53	108.332	0.41499	0.0288		2014-08-06	170	16.423	34.5285	106.16	0.40339	0.0312		2015-04-24	170	15.1111	34.5567	152.87	0.64228	0.0229		2015-04-25	170	13.7581	34.5111	135.602	0.535035	0.0231
	2013-10-16	170	15.4529	34.5561	135.724	0.559731	0.0515		2014-08-05	172	16.3634	34.5306	108.39	0.415356	0.0301		2014-08-06	171	16.3958	34.5294	106.548	0.405797	0.0326		2015-04-24	171	15.0922	34.5561	152.516	0.640054	0.0199		2015-04-25	171	13.7424	34.5113	135.778	0.536125	0.0233
	2013-10-16	171	15.4339	34.5549	135.943	0.561136	0.0563		2014-08-05	173	16.3072	34.5321	108.592	0.416627	0.0315		2014-08-06	172	16.3681	34.5286	106.836	0.407586	0.0322		2015-04-24	172	15.0643	34.5546	151.729	0.635091	0.0183		2015-04-25	172	13.6945	34.5089	135.741	0.535894	0.022
	2013-10-16	172	15.2549	34.5535	135.711	0.559652	0.0377		2014-08-05	174	16.2726	34.5316	109.343	0.421363	0.0302		2014-08-06	173	16.3329	34.5296	106.857	0.407711	0.0319		2015-04-24	173	15.0177	34.552	151.649	0.634587	0.021		2015-04-25	173	13.635	34.5066	136.03	0.537684	0.0216
	2013-10-16	173	15.1605	34.553	135.844	0.560503	0.032		2014-08-05	175	16.2366	34.5321	109.311	0.421158	0.0319		2014-08-06	174	16.2859	34.5309	106.855	0.407698	0.0338		2015-04-24	174	14.9765	34.5512	151.883	0.636064	0.0215		2015-04-25	174	13.5417	34.5065	136.376	0.539831	0.0217
	2013-10-16	174	15.1087	34.5522	137.173	0.569007	0.0338		2014-08-05	176	16.2105	34.5325	109.199	0.420452	0.0305		2014-08-06	175	16.1845	34.5319	107.194	0.409805	0.031		2015-04-24	175	14.9023	34.5461	152.557	0.640312	0.0198		2015-04-25	175	13.496	34.5054	137.286	0.545474	0.0207
	2013-10-16	175	15.0903	34.5494	136.839	0.566871	0.0339		2014-08-05	177	16.1857	34.5312	109.386	0.421633	0.0292		2014-08-06	176	16.1294	34.5327	107.494	0.411663	0.0297		2015-04-24	176	14.8177	34.5411	152.832	0.64204	0.0199		2015-04-25	176	13.4904	34.5054	136.995	0.54367	0.0226
	2013-10-16	176	15.0344	34.5491	136.241	0.563041	0.0485		2014-08-05	178	16.1251	34.5326	109.277	0.420946	0.0288		2014-08-06	177	16.0772	34.533	107.884	0.414082	0.0281		2015-04-24	177	14.7479	34.5417	152.579	0.640446	0.0174		2015-04-25	177	13.4867	34.5046	136.355	0.539699	0.0217
	2013-10-16	177	14.9757	34.548	136.841	0.566884	0.055		2014-08-05	179	16.081	34.5334	109.528	0.422525	0.0296		2014-08-06	178	16.0338	34.5339	107.354	0.410796	0.03		2015-04-24	178	14.6831	34.5436	152.651	0.640903	0.0175		2015-04-25	178	13.4739	34.5039	136.955	0.543419	0.0192
	2013-10-16	178	14.9177	34.5466	136.6	0.565342	0.0534		2014-08-05	180	16.0395	34.5338	109.912	0.424944	0.0283		2014-08-06	179	15.9986	34.5339	107.351	0.410778	0.0291		2015-04-24	179	14.6313	34.5436	149.609	0.621739	0.0213		2015-04-25	179	13.471	34.5038	136.785	0.542368	0.0203
	2013-10-16	179	14.8722	34.545	136.964	0.567669	0.0556		2014-08-05	181	16.0131	34.5339	110.244	0.427036	0.03		2014-08-06	180	15.9763	34.5332	108.352	0.416981	0.0282		2015-04-24	180	14.6007	34.5401	146.376	0.601367	0.0219		2015-04-25	180	13.4523	34.5014	137.175	0.544786	0.0224
	2013-10-16	180	14.8113	34.5428	136.977	0.567755	0.0461		2014-08-05	182	15.9991	34.5331	110.406	0.428057	0.0301		2014-08-06	181	15.9558	34.5322	108.226	0.416201	0.0286		2015-04-24	181	14.5544	34.5351	146.59	0.602714	0.0219		2015-04-25	181	13.4287	34.5015	137.057	0.544053	0.0223
	2013-10-16	181	14.7961	34.5422	134.196	0.549955	0.0324		2014-08-05	183	15.9473	34.5347	110.535	0.428872	0.0303		2014-08-06	182	15.9376	34.5322	108.065	0.415204	0.0283		2015-04-24	182	14.5186	34.5367	146.374	0.601355	0.0202		2015-04-25	182	13.4222	34.4994	136.399	0.539977	0.0231
	2013-10-16	182	14.6935	34.5407	133.229	0.543764	0.0477		2014-08-05	184	15.9168	34.5354	110.732	0.430111	0.0271		2014-08-06	183	15.9174	34.532	108.139	0.415659	0.0286		2015-04-24	183	14.5058	34.5369	143.69	0.584446	0.0209		2015-04-25	183	13.3574	34.5008	136.528	0.540776	0.0246
	2013-10-16	183	14.6564	34.5392	134.595	0.552506	0.0575		2014-08-05	185	15.8281	34.5388	111.721	0.436342	0.0277		2014-08-06	184	15.9049	34.5321	108.337	0.416887	0.0289		2015-04-24	184	14.4972	34.5357	140.807	0.566283	0.0167		2015-04-25	184	13.3054	34.4985	136.524	0.54075	0.0255
	2013-10-16	184	14.5863	34.5373	134.742	0.553449	0.0551		2014-08-05	186	15.7498	34.5414	116.137	0.464164	0.0303		2014-08-06	185	15.8868	34.5321	108.469	0.41771	0.0281		2015-04-24	185	14.4649	34.5304	141.084	0.568029	0.0204		2015-04-25	185	13.2769	34.4989	137.234	0.54515	0.0227
	2013-10-16	185	14.5365	34.5355	135.072	0.555558	0.0456		2014-08-05	187	15.656	34.54	116.872	0.468791	0.0283		2014-08-06	186	15.8708	34.5323	108.488	0.417828	0.0253		2015-04-24	186	14.39	34.5296	141.13	0.568316	0.0227		2015-04-25	186	13.212	34.4942	137.539	0.547039	0.0219
	2013-10-16	186	14.4619	34.5331	135.183	0.55627	0.0714		2014-08-05	188	15.536	34.5425	118.128	0.476704	0.0296		2014-08-06	187	15.8537	34.5321	108.557	0.418252	0.0258		2015-04-24	187	14.3118	34.5259	140.422	0.563858	0.0209		2015-04-25	187	13.1817	34.4964	137.328	0.545731	0.0223
	2013-10-16	187	14.3676	34.5314	135.067	0.555532	0.0666		2014-08-05	189	15.4968	34.5404	118.893	0.481524	0.031		2014-08-06	188	15.8315	34.532	108.336	0.416881	0.0252		2015-04-24	188	14.1938	34.5214	138.878	0.554132	0.0205		2015-04-25	188	13.1595	34.495	137.38	0.546055	0.0209
	2013-10-16	188	14.324	34.531	135.368	0.557457	0.0696		2014-08-05	190	15.4143	34.5377	118.105	0.476563	0.032		2014-08-06	189	15.7779	34.5326	108.743	0.419406	0.0257		2015-04-24	189	14.142	34.5248	136.852	0.541365	0.0213		2015-04-25	189	13.1224	34.4951	137.198	0.544925	0.0213
	2013-10-16	189	14.3115	34.5299	134.677	0.553033	0.0715		2014-08-05	191	15.2967	34.5353	115.653	0.461115	0.0298		2014-08-06	190	15.6961	34.5314	108.814	0.419848	0.027		2015-04-24	190	14.1019	34.5222	137.325	0.544347	0.0209		2015-04-25	190	13.1083	34.4946	136.96	0.543452	0.0212
	2013-10-16	190	14.3466	34.5291	131.466	0.532484	0.0457		2014-08-05	192	15.2332	34.5349	113.719	0.448928	0.0272		2014-08-06	191	15.6436	34.5325	108.952	0.420702	0.0283		2015-04-24	191	14.0923	34.523	137.179	0.543427	0.0224		2015-04-25	191	13.0874	34.4941	137.043	0.543967	0.0202
	2013-10-16	191	14.3004	34.5277	133.148	0.54325	0.0448		2014-08-05	193	15.192	34.5348	113.297	0.446271	0.0265		2014-08-06	192	15.5967	34.5325	109.002	0.421014	0.0306		2015-04-24	192	14.0798	34.5213	137.205	0.543591	0.0227		2015-04-25	192	13.0781	34.4931	136.636	0.541443	0.0203
	2013-10-16	192	14.2173	34.5261	132.553	0.539439	0.0434		2014-08-05	194	15.1623	34.5326	112.742	0.442773	0.027		2014-08-06	193	15.5513	34.5333	109.256	0.422585	0.0303		2015-04-24	193	14.0695	34.5216	137.216	0.543662	0.023		2015-04-25	193	13.0641	34.4932	136.702	0.541853	0.0213
	2013-10-16	193	14.1295	34.5241	132.715	0.540474	0.0494		2014-08-05	195	15.1481	34.532	112.901	0.443774	0.0296		2014-08-06	194	15.506	34.5318	109.435	0.423695	0.028		2015-04-24	194	14.0481	34.5196	136.958	0.542033	0.0247		2015-04-25	194	13.0611	34.4927	137.188	0.544866	0.0212
	2013-10-16	194	14.0697	34.5227	133.265	0.543995	0.0502		2014-08-05	196	15.1319	34.5318	112.705	0.442542	0.0283		2014-08-06	195	15.4948	34.5317	109.405	0.423514	0.0285		2015-04-24	195	14.0306	34.5186	137.038	0.542537	0.0227		2015-04-25	195	13.0432	34.4909	136.934	0.543293	0.0206
	2013-10-16	195	14.0626	34.5218	134.153	0.549678	0.0555		2014-08-05	197	15.1187	34.5304	112.566	0.441663	0.0253		2014-08-06	196	15.4897	34.5316	109.638	0.424954	0.0287		2015-04-24	196	14.0021	34.5179	136.866	0.541453	0.021		2015-04-25	196	13.0254	34.4904	136.976	0.543551	0.0219
	2013-10-16	196	14.0653	34.5191	133.19	0.543514	0.0619		2014-08-05	198	15.1091	34.5301	112.296	0.439962	0.0279		2014-08-06	197	15.4762	34.5313	109.643	0.424985	0.0281		2015-04-24	197	13.9572	34.5175	136.985	0.542209	0.0202		2015-04-25	197	13	34.4905	137.192	0.544892	0.0226
	2013-10-16	197	14.0315	34.5178	133.727	0.546955	0.0574		2014-08-05	199	15.0993	34.5299	112.492	0.441201	0.0302		2014-08-06	198	15.4166	34.5309	109.842	0.42622	0.0273		2015-04-24	198	13.9002	34.5165	136.513	0.539232	0.0211		2015-04-25	198	12.9752	34.4902	137.028	0.543875	0.0245
	2013-10-16	198	13.9959	34.5156	134.661	0.552928	0.0508		2014-08-05	200	15.0874	34.5295	112.613	0.441964	0.0298		2014-08-06	199	15.3865	34.5307	110.094	0.427784	0.0307		2015-04-24	199	13.8981	34.5166	136.357	0.538248	0.0256		2015-04-25	199	12.9645	34.49	136.648	0.541516	0.0227
	2013-10-16	199	13.9163	34.5158	136.506	0.564735	0.0531		2014-08-05	201	15.0185	34.528	112.637	0.442112	0.0274		2014-08-06	200	15.3549	34.5306	110.138	0.428059	0.0297		2015-04-24	200	13.8879	34.5151	136.289	0.53782	0.0216		2015-04-25	200	12.9461	34.489	136.125	0.538272	0.0212
	2013-10-16	200	13.9533	34.514	136.671	0.565797	0.0572		2014-08-05	202	14.8379	34.5299	113.109	0.44509	0.0249		2014-08-06	201	15.3248	34.5297	110.134	0.428034	0.0296		2015-04-24	201	13.8683	34.5142	136.56	0.539525	0.0219		2015-04-25	201	12.8908	34.4868	136.223	0.53888	0.0201
	2013-10-16	201	13.8498	34.5146	135.465	0.558077	0.0451		2014-08-05	203	14.7722	34.5291	115.057	0.457361	0.0255		2014-08-06	202	15.2398	34.5303	110.392	0.42963	0.0272		2015-04-24	202	13.823	34.5129	136.593	0.539736	0.0211		2015-04-25	202	12.8603	34.4877	135.692	0.53559	0.0199
	2013-10-16	202	13.8242	34.5131	135.806	0.560259	0.0592		2014-08-05	204	14.7146	34.5277	115.146	0.457919	0.0277		2014-08-06	203	15.1698	34.5296	110.603	0.430939	0.0271		2015-04-24	203	13.8018	34.512	136.182	0.537146	0.0193		2015-04-25	203	12.8473	34.4863	135.422	0.533918	0.0217
	2013-10-16	203	13.8	34.5123	135.367	0.55745	0.0536		2014-08-05	205	14.6881	34.5271	114.301	0.452599	0.0286		2014-08-06	204	15.1369	34.5291	110.895	0.432747	0.0272		2015-04-24	204	13.7552	34.5105	136.366	0.538306	0.0186		2015-04-25	204	12.8236	34.4857	135.46	0.53415	0.0203
	2013-10-16	204	13.7579	34.5113	135.204	0.556409	0.0577		2014-08-05	206	14.6615	34.5261	113.708	0.448863	0.0294		2014-08-06	205	15.1156	34.5291	110.879	0.432647	0.026		2015-04-24	205	13.7236	34.511	136.262	0.53765	0.02		2015-04-25	205	12.8123	34.4853	135.396	0.533753	0.0229
	2013-10-16	205	13.7238	34.5107	135.094	0.555703	0.0576		2014-08-05	207	14.6235	34.5243	114.14	0.451585	0.0305		2014-08-06	206	15.0977	34.5284	110.763	0.43193	0.0286		2015-04-24	206	13.7028	34.5111	136.336	0.538119	0.0216		2015-04-25	206	12.789	34.4854	135.804	0.536284	0.0231
	2013-10-16	206	13.7235	34.5102	136.124	0.562296	0.065		2014-08-05	208	14.6037	34.525	114.343	0.452862	0.0287		2014-08-06	207	15.0895	34.5278	110.856	0.43251	0.0286		2015-04-24	207	13.6847	34.5097	136.562	0.539543	0.02		2015-04-25	207	12.7847	34.4853	135.927	0.53705	0.0208
	2013-10-16	207	13.7426	34.5087	135.236	0.556613	0.0277		2014-08-05	209	14.6003	34.5243	114.813	0.45582	0.0283		2014-08-06	208	15.0797	34.528	110.812	0.432235	0.0283		2015-04-24	208	13.6339	34.5063	136.833	0.541248	0.0195		2015-04-25	208	12.7807	34.4838	135.606	0.535055	0.0204
	2013-10-16	208	13.6954	34.5087	135.503	0.558321	0.047		2014-08-05	210	14.5831	34.5237	114.855	0.456083	0.0279		2014-08-06	209	15.0739	34.5269	110.853	0.432491	0.0282		2015-04-24	209	13.579	34.5079	137.023	0.542443	0.0185		2015-04-25	209	12.7646	34.484	135.77	0.536072	0.0199
	2013-10-16	209	13.667	34.5075	136.085	0.562045	0.0486		2014-08-05	211	14.5633	34.5229	115.043	0.457271	0.0283		2014-08-06	210	15.0307	34.5259	110.812	0.432235	0.0269		2015-04-24	210	13.5581	34.5074	137.406	0.544857	0.0181		2015-04-25	210	12.7555	34.484	135.55	0.534711	0.0216
	2013-10-16	210	13.6367	34.5065	135.531	0.558499	0.0508		2014-08-05	212	14.5397	34.523	115.486	0.460063	0.0299		2014-08-06	211	14.8924	34.5286	110.99	0.433339	0.0303		2015-04-24	211	13.5486	34.5063	137.883	0.547863	0.0193		2015-04-25	211	12.7182	34.4814	135.589	0.534949	0.02
	2013-10-16	211	13.6132	34.5063	135.18	0.556251	0.0474		2014-08-05	213	14.5221	34.5227	115.749	0.461718	0.0284		2014-08-06	212	14.7408	34.5271	111.465	0.436281	0.0271		2015-04-24	212	13.5181	34.504	137.97	0.548413	0.0209		2015-04-25	212	12.6988	34.4823	135.521	0.534533	0.019
	2013-10-16	212	13.5823	34.5066	136.443	0.564333	0.0556		2014-08-05	214	14.5127	34.5222	116.005	0.463329	0.0296		2014-08-06	213	14.6647	34.5235	111.964	0.43938	0.0286		2015-04-24	213	13.4731	34.5038	138.025	0.548759	0.0215		2015-04-25	213	12.6797	34.4824	134.819	0.530179	0.0207
	2013-10-16	213	13.6308	34.5054	135.523	0.558446	0.0476		2014-08-05	215	14.4956	34.5209	115.773	0.461872	0.0279		2014-08-06	214	14.6578	34.5244	111.697	0.437721	0.0293		2015-04-24	214	13.4369	34.5043	137.716	0.546808	0.0214		2015-04-25	214	12.6553	34.4814	134.921	0.530813	0.0204
	2013-10-16	214	13.5754	34.5055	135.673	0.559408	0.0623		2014-08-05	216	14.4567	34.5206	115.819	0.462161	0.0286		2014-08-06	215	14.655	34.5239	111.779	0.438233	0.0302		2015-04-24	215	13.4229	34.5037	137.733	0.546919	0.023		2015-04-25	215	12.6367	34.4806	134.894	0.530641	0.0216
	2013-10-16	215	13.5444	34.5054	135.172	0.556198	0.0671		2014-08-05	217	14.403	34.5203	115.459	0.459889	0.0302		2014-08-06	216	14.6445	34.523	111.672	0.437566	0.0261		2015-04-24	216	13.3867	34.4977	137.623	0.546222	0.0239		2015-04-25	216	12.6248	34.4807	135.08	0.531798	0.0216
	2013-10-16	216	13.5441	34.5036	133.813	0.547502	0.0465		2014-08-05	218	14.3454	34.5204	115.276	0.45874	0.0282		2014-08-06	217	14.6106	34.5216	111.811	0.438426	0.0305		2015-04-24	217	13.3294	34.497	137.723	0.546855	0.0226		2015-04-25	217	12.6023	34.4792	135.109	0.531976	0.02
	2013-10-16	217	13.4913	34.5044	134.8	0.553818	0.0546		2014-08-05	219	14.3271	34.5188	114.812	0.455814	0.0305		2014-08-06	218	14.5728	34.5219	111.824	0.438507	0.0278		2015-04-24	218	13.2858	34.4974	137.564	0.545853	0.0208		2015-04-25	218	12.5953	34.4801	135.271	0.53298	0.0202
	2013-10-16	218	13.4654	34.5039	134.937	0.554695	0.0593		2014-08-05	220	14.315	34.5183	114.562	0.454242	0.0287		2014-08-06	219	14.5246	34.522	112.252	0.441163	0.0262		2015-04-24	219	13.2644	34.4987	136.063	0.536396	0.0205		2015-04-25	219	12.5936	34.4798	135.922	0.537017	0.0198
	2013-10-16	219	13.4414	34.5028	134.063	0.549104	0.0456		2014-08-05	221	14.242	34.5197	114.501	0.453857	0.0294		2014-08-06	220	14.47	34.5223	115.782	0.463051	0.0246		2015-04-24	220	13.2514	34.4949	136.246	0.537551	0.0211		2015-04-25	220	12.5854	34.4791	136.015	0.537592	0.0223
	2013-10-16	220	13.4049	34.5012	134.918	0.554576	0.0643		2014-08-05	222	14.1126	34.5183	114.51	0.453914	0.029		2014-08-06	221	14.4344	34.5202	117.597	0.474303	0.0281		2015-04-24	221	13.1928	34.494	136.135	0.536853	0.0217		2015-04-25	221	12.5629	34.4773	136.018	0.537612	0.0236
	2013-10-16	221	13.3967	34.4989	136.797	0.566601	0.0469		2014-08-05	223	14.0528	34.5146	115.058	0.457367	0.0289		2014-08-06	222	14.415	34.5203	116.037	0.464628	0.0262		2015-04-24	222	13.1556	34.4969	135.981	0.535881	0.022		2015-04-25	222	12.5315	34.4787	135.603	0.535041	0.0223
	2013-10-16	222	13.3508	34.4995	135.658	0.55931	0.0371		2014-08-05	224	14.0209	34.5136	115.202	0.458272	0.0268		2014-08-06	223	14.41	34.5197	116.237	0.465868	0.0244		2015-04-24	223	13.1385	34.4968	137.125	0.543087	0.0216		2015-04-25	223	12.5104	34.4775	135.649	0.535326	0.0203
	2013-10-16	223	13.3283	34.4988	135.897	0.560839	0.0391		2014-08-05	225	14.0106	34.5129	114.975	0.456841	0.0271		2014-08-06	224	14.3894	34.5185	116.42	0.467003	0.0245		2015-04-24	224	13.134	34.496	137.899	0.547962	0.0211		2015-04-25	224	12.4966	34.4766	135.176	0.532392	0.0205
	2013-10-16	224	13.2857	34.4987	136.563	0.565104	0.055		2014-08-05	226	13.9988	34.5121	114.85	0.456058	0.0312		2014-08-06	225	14.3419	34.519	115.334	0.46027	0.0295		2015-04-24	225	13.1269	34.4957	137.691	0.546656	0.0196		2015-04-25	225	12.4869	34.4763	135.449	0.534084	0.0219
	2013-10-16	225	13.2626	34.497	135.774	0.560054	0.0602		2014-08-05	227	13.9823	34.5117	114.85	0.456058	0.0296		2014-08-06	226	14.2906	34.5171	115.292	0.460008	0.0307		2015-04-24	226	13.1231	34.4948	137.265	0.543972	0.0223		2015-04-25	226	12.4665	34.4762	135.451	0.534097	0.0199
	2013-10-16	226	13.2067	34.4969	135.165	0.556158	0.0616		2014-08-05	228	13.9722	34.5115	114.981	0.456879	0.0298		2014-08-06	227	14.2905	34.5158	113.663	0.449909	0.0274		2015-04-24	227	13.0922	34.4924	137.625	0.54624	0.0221		2015-04-25	227	12.4015	34.4732	135.32	0.533284	0.0204
	2013-10-16	227	13.1917	34.4961	134.896	0.554438	0.0701		2014-08-05	229	13.9245	34.5105	115.099	0.457624	0.028		2014-08-06	228	14.2095	34.5162	113.937	0.451611	0.0299		2015-04-24	228	13.0736	34.4934	137.584	0.545982	0.023		2015-04-25	228	12.3915	34.4752	135.063	0.531692	0.0219
	2013-10-16	228	13.1492	34.4948	135.279	0.556883	0.0587		2014-08-05	230	13.8491	34.509	114.85	0.456058	0.0278		2014-08-06	229	14.1751	34.5156	114.253	0.453569	0.0292		2015-04-24	229	13.0436	34.4916	137.384	0.544716	0.0232		2015-04-25	229	12.3869	34.4749	135.376	0.533634	0.0226
	2013-10-16	229	13.1253	34.4933	135.552	0.55863	0.0539		2014-08-05	231	13.8215	34.5081	114.652	0.454806	0.026		2014-08-06	230	14.1587	34.5141	114.075	0.452465	0.0291		2015-04-24	230	13.0231	34.4922	137.527	0.545619	0.0205		2015-04-25	230	12.3898	34.4736	135.875	0.536726	0.0231
	2013-10-16	230	13.0765	34.492	135.623	0.559085	0.0633		2014-08-05	232	13.8186	34.5079	114.825	0.455897	0.028		2014-08-06	231	14.1349	34.5137	113.809	0.450813	0.0288		2015-04-24	231	12.9882	34.4914	137.669	0.546515	0.02		2015-04-25	231	12.3814	34.4745	135.327	0.53333	0.021
	2013-10-16	231	13.0043	34.4916	135.94	0.561116	0.061		2014-08-05	233	13.8163	34.5075	114.716	0.455211	0.0292		2014-08-06	232	14.1082	34.5127	113.939	0.451624	0.0284		2015-04-24	232	12.9745	34.4908	137.769	0.547142	0.0204		2015-04-25	232	12.3695	34.4735	135.294	0.533126	0.0224
	2013-10-16	232	12.9435	34.4917	135.942	0.561129	0.0513		2014-08-05	234	13.8079	34.5067	114.571	0.454299	0.0294		2014-08-06	233	14.0974	34.5125	113.885	0.451287	0.029		2015-04-24	233	12.9564	34.4899	137.876	0.547822	0.0219		2015-04-25	233	12.3517	34.473	134.111	0.525785	0.0219
	2013-10-16	233	12.8896	34.4914	134.116	0.54944	0.0486		2014-08-05	235	13.7879	34.5063	114.628	0.454659	0.0297		2014-08-06	234	14.0924	34.512	113.651	0.449834	0.0283		2015-04-24	234	12.9393	34.4893	137.631	0.546275	0.0197		2015-04-25	234	12.3312	34.4726	133.526	0.522158	0.0209
	2013-10-16	234	12.917	34.49	130.578	0.526801	0.0407		2014-08-05	236	13.7739	34.5061	114.601	0.454485	0.027		2014-08-06	235	14.0807	34.5119	113.818	0.450869	0.0282		2015-04-24	235	12.8993	34.489	137.727	0.546878	0.0188		2015-04-25	235	12.3163	34.4718	132.905	0.518313	0.0226
	2013-10-16	235	12.8703	34.4891	131.848	0.53493	0.05		2014-08-05	237	13.7424	34.5054	114.544	0.454126	0.0263		2014-08-06	236	14.043	34.5115	113.728	0.450314	0.0279		2015-04-24	236	12.8853	34.4889	137.84	0.547593	0.0189		2015-04-25	236	12.2452	34.4697	131.846	0.511746	0.0209
	2013-10-16	236	12.802	34.4866	132.01	0.535965	0.0542		2014-08-05	238	13.7084	34.5052	114.113	0.451411	0.0292		2014-08-06	237	14.0222	34.5102	113.682	0.450028	0.0285		2015-04-24	237	12.8732	34.4882	138.164	0.549632	0.021		2015-04-25	237	12.2082	34.4694	132.211	0.514006	0.0224
	2013-10-16	237	12.7707	34.4862	132.171	0.536993	0.0556		2014-08-05	239	13.6955	34.5036	114.022	0.45084	0.031		2014-08-06	238	14.0052	34.5103	113.745	0.45042	0.0289		2015-04-24	238	12.8693	34.4885	138.318	0.550605	0.0223		2015-04-25	238	12.1871	34.4697	131.806	0.511495	0.022
	2013-10-16	238	12.6996	34.4848	131.71	0.534047	0.0712		2014-08-05	240	13.6565	34.5038	113.924	0.450224	0.0283		2014-08-06	239	13.9918	34.5094	113.725	0.450296	0.0271		2015-04-24	239	12.8612	34.4877	138.624	0.552532	0.0234		2015-04-25	239	12.1547	34.4666	131.881	0.511964	0.0202
	2013-10-16	239	12.6492	34.4854	131.558	0.533071	0.078		2014-08-05	241	13.6275	34.5036	113.872	0.449897	0.0276		2014-08-06	240	13.965	34.5092	113.512	0.448974	0.029		2015-04-24	240	12.8422	34.487	139.181	0.556042	0.0228		2015-04-25	240	12.1101	34.4681	131.108	0.507168	0.0202
	2013-10-16	240	12.6552	34.4838	128.614	0.514229	0.0629		2014-08-05	242	13.5932	34.5031	113.848	0.449743	0.0281		2014-08-06	241	13.9453	34.5086	113.617	0.449622	0.0272		2015-04-24	241	12.8297	34.4871	138.563	0.552145	0.0209		2015-04-25	241	12.0923	34.4665	131.045	0.506778	0.0231
	2013-10-16	241	12.6306	34.4833	128.42	0.51299	0.0504		2014-08-05	243	13.5701	34.5023	113.729	0.448992	0.0277		2014-08-06	242	13.9201	34.5081	113.564	0.449298	0.0271		2015-04-24	242	12.8252	34.4868	137.807	0.547382	0.0241		2015-04-25	242	12.0683	34.4662	131.079	0.506989	0.0224
	2013-10-16	242	12.6176	34.4828	129.437	0.519497	0.0554		2014-08-05	244	13.5645	34.5013	112.932	0.443973	0.0286		2014-08-06	243	13.9008	34.5082	113.569	0.449329	0.0258		2015-04-24	243	12.8226	34.4867	137.809	0.547394	0.0224		2015-04-25	243	12.0301	34.4657	130.637	0.504248	0.0213
	2013-10-16	243	12.6078	34.4826	125.67	0.495387	0.0565		2014-08-05	245	13.558	34.5013	112.928	0.443947	0.0284		2014-08-06	244	13.8891	34.5083	113.601	0.449529	0.0271		2015-04-24	244	12.8086	34.485	137.851	0.547663	0.0208		2015-04-25	244	12.0202	34.4655	129.831	0.499253	0.0191
	2013-10-16	244	12.5296	34.4838	127.321	0.505955	0.0714		2014-08-05	246	13.548	34.501	112.736	0.442734	0.0277		2014-08-06	245	13.8774	34.5074	113.876	0.451231	0.0284		2015-04-24	245	12.7683	34.4839	137.869	0.547775	0.0216		2015-04-25	245	12.008	34.465	129.86	0.499431	0.0216
	2013-10-16	245	12.5029	34.4832	124.649	0.488854	0.0731		2014-08-05	247	13.5279	34.5007	112.575	0.44172	0.0301		2014-08-06	246	13.8712	34.5069	113.893	0.451337	0.027		2015-04-24	246	12.7338	34.4838	137.473	0.545279	0.0203		2015-04-25	246	11.9948	34.4646	129.9	0.499682	0.0246
	2013-10-16	246	12.5014	34.4826	120.786	0.464132	0.0663		2014-08-05	248	13.5162	34.5002	112.98	0.444275	0.028		2014-08-06	247	13.8632	34.5063	113.835	0.450975	0.0293		2015-04-24	247	12.7207	34.4841	137.056	0.542654	0.0195		2015-04-25	247	11.987	34.4639	129.818	0.499174	0.022
	2013-10-16	247	12.495	34.4822	121.322	0.46756	0.0657		2014-08-05	249	13.4563	34.4997	113.484	0.447452	0.03		2014-08-06	248	13.8519	34.5064	114.109	0.452677	0.0283		2015-04-24	248	12.71	34.4823	137.832	0.54754	0.0185		2015-04-25	248	11.9816	34.4643	128.386	0.490294	0.0232
	2013-10-16	248	12.4528	34.4814	121.766	0.470401	0.0621		2014-08-05	250	13.392	34.4988	113.969	0.450506	0.0285		2014-08-06	249	13.8425	34.5061	113.891	0.451324	0.0298		2015-04-24	249	12.6853	34.4816	137.6	0.546081	0.019		2015-04-25	249	11.9735	34.4629	127.798	0.486647	0.0235
	2013-10-16	249	12.4047	34.48	122.139	0.472788	0.0494		2014-08-05	251	13.3461	34.4982	113.641	0.44844	0.0291		2014-08-06	250	13.8096	34.5054	113.873	0.451212	0.0292		2015-04-24	250	12.6676	34.4813	137.536	0.545677	0.0212		2015-04-25	250	11.962	34.4612	128.22	0.489264	0.0238
	2013-10-16	250	12.3687	34.4795	122.32	0.473948	0.053		2014-08-05	252	13.3147	34.4971	112.851	0.44346	0.0302		2014-08-06	251	13.7835	34.5057	113.872	0.451206	0.0293		2015-04-24	251	12.6449	34.4806	137.397	0.544804	0.0223		2015-04-25	251	11.9372	34.4625	127.313	0.483641	0.0232
	2013-10-16	251	12.3674	34.4783	121.832	0.470823	0.0405		2014-08-05	253	13.3067	34.4961	112.751	0.442831	0.0286		2014-08-06	252	13.7352	34.5042	113.739	0.450383	0.0292		2015-04-24	252	12.6646	34.4815	137.029	0.542484	0.0217		2015-04-25	252	11.8992	34.462	127.773	0.486495	0.0225
	2013-10-16	252	12.3527	34.4781	121.891	0.471205	0.0467		2014-08-05	254	13.2974	34.4956	112.796	0.443113	0.0273		2014-08-06	253	13.7086	34.5034	113.406	0.448319	0.0265		2015-04-24	253	12.6061	34.4738	137.416	0.544921	0.0218		2015-04-25	253	11.8919	34.4627	126.983	0.481593	0.0224
	2013-10-16	253	12.3312	34.4773	122.214	0.473269	0.0433		2014-08-05	255	13.2871	34.4951	112.981	0.444281	0.0287		2014-08-06	254	13.7035	34.5032	113.382	0.44817	0.0297		2015-04-24	254	12.5479	34.4725	137.429	0.545003	0.0202		2015-04-25	254	11.8883	34.4621	125.909	0.474934	0.022
	2013-10-16	254	12.2916	34.4772	122.387	0.474377	0.0569		2014-08-05	256	13.2712	34.4948	112.841	0.443395	0.0297		2014-08-06	255	13.6866	34.5026	113.371	0.448101	0.0295		2015-04-24	255	12.4947	34.4779	137.229	0.543744	0.02		2015-04-25	255	11.8859	34.4618	125.87	0.474696	0.0218
	2013-10-16	255	12.2905	34.4764	121.662	0.469735	0.0579		2014-08-05	257	13.2438	34.4951	112.675	0.442349	0.0284		2014-08-06	256	13.6443	34.501	113.315	0.447752	0.0286		2015-04-24	256	12.511	34.4788	135.931	0.535564	0.0235		2015-04-25	256	11.8799	34.4611	125.597	0.473004	0.0234
	2013-10-16	256	12.2618	34.4759	121.299	0.467415	0.0489		2014-08-05	258	13.2107	34.4944	112.846	0.443428	0.0315		2014-08-06	257	13.6123	34.5021	113.335	0.447877	0.0287		2015-04-24	257	12.4993	34.4708	135.765	0.534522	0.025		2015-04-25	257	11.8663	34.4612	125.701	0.473645	0.0235
	2013-10-16	257	12.2515	34.4755	121.361	0.46781	0.0473		2014-08-05	259	13.1755	34.493	112.998	0.44439	0.0305		2014-08-06	258	13.5844	34.5003	113.3	0.447659	0.0316		2015-04-24	258	12.4175	34.4719	136.228	0.537439	0.023		2015-04-25	258	11.8444	34.4595	125.589	0.472952	0.0241
	2013-10-16	258	12.2368	34.4751	121.093	0.466096	0.0536		2014-08-05	260	13.1438	34.4921	112.999	0.444397	0.0298		2014-08-06	259	13.5473	34.5004	113.38	0.448157	0.0298		2015-04-24	259	12.3861	34.4762	136.327	0.53806	0.0193		2015-04-25	259	11.8208	34.4597	125.506	0.472436	0.0233
	2013-10-16	259	12.2238	34.4744	120.916	0.464962	0.0489		2014-08-05	261	13.1028	34.4916	112.857	0.443498	0.0278		2014-08-06	260	13.5256	34.4995	113.217	0.447147	0.0295		2015-04-24	260	12.3818	34.4759	135.206	0.531	0.0225		2015-04-25	260	11.7873	34.46	124.963	0.469073	0.0217
	2013-10-16	260	12.2114	34.4743	121.497	0.46868	0.053		2014-08-05	262	13.0278	34.4912	113.091	0.444974	0.0279		2014-08-06	261	13.498	34.4986	113.041	0.446056	0.0264		2015-04-24	261	12.3669	34.4739	134.64	0.527432	0.0213		2015-04-25	261	11.7594	34.4593	124.663	0.46721	0.0227
	2013-10-16	261	12.1912	34.4738	121.301	0.467428	0.053		2014-08-05	263	12.9858	34.4896	113.327	0.446463	0.0287		2014-08-06	262	13.4858	34.4984	113.005	0.445832	0.0261		2015-04-24	262	12.3579	34.475	134.819	0.528557	0.0209		2015-04-25	262	11.7459	34.4584	124.768	0.467864	0.0208
	2013-10-16	262	12.1769	34.4735	121.178	0.466637	0.0374		2014-08-05	264	12.9667	34.4881	113.298	0.446277	0.0309		2014-08-06	263	13.4744	34.4979	112.771	0.44438	0.0251		2015-04-24	263	12.3564	34.4747	134.976	0.529547	0.0231		2015-04-25	263	11.7343	34.4585	124.743	0.467706	0.0233
	2013-10-16	263	12.1735	34.4728	120.554	0.462648	0.0612		2014-08-05	265	12.9319	34.4872	113.291	0.446232	0.0282		2014-08-06	264	13.4405	34.4971	112.611	0.443388	0.0253		2015-04-24	264	12.3556	34.4745	134.979	0.529565	0.0225		2015-04-25	264	11.7207	34.458	124.489	0.466133	0.023
	2013-10-16	264	12.1552	34.4723	120.998	0.46549	0.0585		2014-08-05	266	12.8945	34.4864	113.538	0.447792	0.0266		2014-08-06	265	13.4013	34.4969	112.817	0.444666	0.0243		2015-04-24	265	12.3523	34.4738	135.322	0.531727	0.0194		2015-04-25	265	11.6907	34.4577	124.529	0.466378	0.0222
	2013-10-16	265	12.137	34.4724	121.104	0.466169	0.0515		2014-08-05	267	12.8652	34.4859	113.621	0.448312	0.0267		2014-08-06	266	13.3794	34.4957	112.842	0.444822	0.0315		2015-04-24	266	12.348	34.474	135.201	0.530965	0.0192		2015-04-25	266	11.6827	34.4574	124.29	0.464898	0.0226
	2013-10-16	266	12.1274	34.4727	121.103	0.466162	0.0627		2014-08-05	268	12.8318	34.4854	113.757	0.449172	0.0267		2014-08-06	267	13.3542	34.495	112.927	0.445346	0.026		2015-04-24	267	12.3217	34.4711	135.348	0.531891	0.0177		2015-04-25	267	11.6768	34.4573	124.385	0.465486	0.0203
	2013-10-16	267	12.1264	34.4718	120.91	0.464923	0.0687		2014-08-05	269	12.8095	34.4844	113.555	0.447894	0.0288		2014-08-06	268	13.3323	34.4946	112.833	0.444766	0.0276		2015-04-24	268	12.3006	34.4727	135.431	0.532418	0.0177		2015-04-25	268	11.6683	34.457	124.176	0.464191	0.0212
	2013-10-16	268	12.095	34.4717	120.87	0.464666	0.067		2014-08-05	270	12.7978	34.484	113.039	0.444647	0.0294		2014-08-06	269	13.3052	34.4935	112.899	0.445171	0.0279		2015-04-24	269	12.2925	34.4726	135.28	0.531463	0.0209		2015-04-25	269	11.664	34.4568	123.596	0.460597	0.0229
	2013-10-16	269	12.0862	34.4714	120.378	0.461521	0.0638		2014-08-05	271	12.7727	34.4833	112.842	0.443402	0.0308		2014-08-06	270	13.2706	34.4938	112.988	0.445726	0.0304		2015-04-24	270	12.2855	34.472	134.385	0.525827	0.0204		2015-04-25	270	11.6516	34.4557	123.927	0.462645	0.0223
	2013-10-16	270	12.076	34.4711	120.224	0.460532	0.0678		2014-08-05	272	12.7631	34.4825	112.72	0.442638	0.0306		2014-08-06	271	13.2446	34.4928	112.809	0.444616	0.03		2015-04-24	271	12.271	34.4709	134.33	0.525481	0.0192		2015-04-25	271	11.6312	34.4564	123.521	0.460128	0.0229
	2013-10-16	271	12.0598	34.4703	120.154	0.460084	0.0632		2014-08-05	273	12.7507	34.4818	112.504	0.441278	0.0298		2014-08-06	272	13.1926	34.4918	113.091	0.446362	0.028		2015-04-24	272	12.2577	34.4713	134.232	0.52486	0.0196		2015-04-25	272	11.6319	34.4562	122.917	0.456388	0.0237
	2013-10-16	272	12.0388	34.4702	120.108	0.459794	0.0551		2014-08-05	274	12.7305	34.4814	112.5	0.441252	0.0289		2014-08-06	273	13.1394	34.4911	112.81	0.444623	0.0274		2015-04-24	273	12.2535	34.4716	134.235	0.524884	0.0221		2015-04-25	273	11.6243	34.4533	123.107	0.457564	0.0206
	2013-10-16	273	12.0122	34.4695	120.205	0.460413	0.0507		2014-08-05	275	12.7058	34.4805	112.809	0.443197	0.031		2014-08-06	274	13.0963	34.49	112.935	0.445396	0.0293		2015-04-24	274	12.2537	34.4712	134.517	0.526659	0.0222		2015-04-25	274	11.5802	34.4532	122.989	0.456831	0.0197
	2013-10-16	274	11.9767	34.4692	120.204	0.460407	0.0495		2014-08-05	276	12.668	34.4794	112.922	0.443909	0.0294		2014-08-06	275	13.0777	34.4888	112.631	0.443513	0.028		2015-04-24	275	12.2498	34.4705	134.246	0.524948	0.0216		2015-04-25	275	11.56	34.4546	122.562	0.454182	0.0239
	2013-10-16	275	11.963	34.4681	119.147	0.453643	0.0626		2014-08-05	277	12.6273	34.4769	113.031	0.444596	0.0275		2014-08-06	276	13.0606	34.4882	112.692	0.443893	0.0284		2015-04-24	276	12.2452	34.4709	134.364	0.525692	0.0209		2015-04-25	276	11.5401	34.4541	122.299	0.452557	0.0224
	2013-10-16	276	11.9482	34.468	119.603	0.456557	0.0624		2014-08-05	278	12.585	34.4781	113.36	0.446669	0.0265		2014-08-06	277	13.0018	34.4874	112.674	0.443781	0.0264		2015-04-24	277	12.242	34.4706	134.195	0.524632	0.0223		2015-04-25	277	11.4882	34.4515	121.047	0.444794	0.0218
	2013-10-16	277	11.947	34.4678	119.665	0.456959	0.0428		2014-08-05	279	12.5628	34.4772	113.56	0.447926	0.0296		2014-08-06	278	12.9405	34.4864	112.714	0.444024	0.0289		2015-04-24	278	12.2172	34.4676	133.998	0.523389	0.0218		2015-04-25	278	11.4374	34.4522	120.11	0.43898	0.0216
	2013-10-16	278	11.9412	34.4676	119.788	0.457743	0.0337		2014-08-05	280	12.5348	34.4766	113.274	0.446123	0.0296		2014-08-06	279	12.8992	34.4846	112.464	0.442478	0.0301		2015-04-24	279	12.151	34.4648	133.801	0.522147	0.022		2015-04-25	279	11.3951	34.451	119.499	0.435194	0.0231
	2013-10-16	279	11.9301	34.4675	119.841	0.45808	0.0333		2014-08-05	281	12.474	34.4764	113.292	0.446239	0.0283		2014-08-06	280	12.8946	34.4842	112.632	0.443519	0.0307		2015-04-24	280	12.1471	34.4701	131.169	0.505566	0.0247		2015-04-25	280	11.3414	34.4509	119.471	0.435022	0.0241
	2013-10-16	280	11.9261	34.4666	119.476	0.455746	0.0446		2014-08-05	282	12.4413	34.4748	113.289	0.446219	0.0286		2014-08-06	281	12.8911	34.4838	112.325	0.441618	0.0287		2015-04-24	281	12.1091	34.4631	132.247	0.512357	0.0242		2015-04-25	281	11.3333	34.4507	119.18	0.433219	0.0248
	2013-10-16	281	11.9019	34.4666	119.036	0.452931	0.0352		2014-08-05	283	12.4136	34.474	113.051	0.444724	0.0289		2014-08-06	282	12.8767	34.4833	112.356	0.441805	0.03		2015-04-24	282	12.0944	34.468	132.304	0.512714	0.0248		2015-04-25	282	11.3115	34.4487	119.236	0.433562	0.0255
	2013-10-16	282	11.8826	34.4661	119.51	0.455963	0.0516		2014-08-05	284	12.3376	34.4735	112.428	0.440796	0.0284		2014-08-06	283	12.8584	34.4827	112.546	0.442983	0.0281		2015-04-24	283	12.09	34.4676	132.11	0.511496	0.0238		2015-04-25	283	11.2559	34.4492	118.832	0.431058	0.0237
	2013-10-16	283	11.8487	34.4659	119.619	0.456662	0.0537		2014-08-05	285	12.3038	34.4721	111.884	0.437369	0.0302		2014-08-06	284	12.8388	34.4824	112.691	0.443887	0.0294		2015-04-24	284	12.1006	34.4677	131.771	0.509357	0.0239		2015-04-25	284	11.2347	34.4481	118.145	0.426797	0.0213
	2013-10-16	284	11.8297	34.4652	119.298	0.454605	0.0502		2014-08-05	286	12.2927	34.4709	112.091	0.438672	0.0302		2014-08-06	285	12.8392	34.482	112.381	0.441961	0.0274		2015-04-24	285	12.0877	34.464	132.158	0.511795	0.0239		2015-04-25	285	11.2219	34.4478	118.594	0.429585	0.0213
	2013-10-16	285	11.8108	34.4645	119.385	0.455166	0.0539		2014-08-05	287	12.2756	34.4697	112.334	0.440206	0.0311		2014-08-06	286	12.8176	34.4819	112.386	0.441992	0.0277		2015-04-24	286	12.0459	34.4645	132.229	0.512246	0.0227		2015-04-25	286	11.2313	34.448	118.471	0.428819	0.0243
	2013-10-16	286	11.7438	34.4638	119.149	0.453656	0.0578		2014-08-05	288	12.2472	34.469	112.247	0.439654	0.0277		2014-08-06	287	12.811	34.4815	112.165	0.44062	0.03		2015-04-24	287	12.0027	34.4634	132.115	0.511525	0.0219		2015-04-25	287	11.2028	34.4457	118.809	0.430913	0.025
	2013-10-16	287	11.699	34.4635	119.255	0.454335	0.0376		2014-08-05	289	12.2218	34.469	112.46	0.440995	0.0286		2014-08-06	288	12.8029	34.4812	112.269	0.441269	0.0287		2015-04-24	288	11.9826	34.4645	131.794	0.509504	0.0218		2015-04-25	288	11.1767	34.4476	118.257	0.427491	0.0241
	2013-10-16	288	11.6867	34.4629	118.811	0.451493	0.0291		2014-08-05	290	12.2124	34.4683	112.463	0.441014	0.0305		2014-08-06	289	12.7844	34.4807	112.088	0.440147	0.0269		2015-04-24	289	11.9715	34.4642	131.438	0.50726	0.0215		2015-04-25	289	11.1685	34.4469	117.89	0.425218	0.0229
	2013-10-16	289	11.6629	34.4627	118.232	0.447782	0.0489		2014-08-05	291	12.1979	34.4677	112.415	0.440713	0.0291		2014-08-06	290	12.749	34.4798	112.182	0.440726	0.0286		2015-04-24	290	11.9676	34.4626	131.506	0.507687	0.0222		2015-04-25	290	11.1626	34.4468	117.944	0.425555	0.0235
	2013-10-16	290	11.6503	34.4616	117.073	0.440365	0.0586		2014-08-05	292	12.1843	34.4674	112.396	0.440597	0.0275		2014-08-06	291	12.7739	34.4799	112.146	0.440508	0.0296		2015-04-24	291	11.9401	34.4638	131.391	0.506961	0.0244		2015-04-25	291	11.1502	34.4462	117.726	0.424201	0.023
	2013-10-16	291	11.6092	34.4612	117.913	0.445745	0.0628		2014-08-05	293	12.1694	34.4664	112.362	0.440379	0.0297		2014-08-06	292	12.726	34.4785	112.396	0.442054	0.029		2015-04-24	292	11.9351	34.4636	131.395	0.50699	0.024		2015-04-25	292	11.137	34.4457	117.825	0.424815	0.0238
	2013-10-16	292	11.5984	34.4609	117.567	0.44353	0.0614		2014-08-05	294	12.146	34.4659	112.214	0.439449	0.031		2014-08-06	293	12.6665	34.479	112.232	0.441038	0.0288		2015-04-24	293	11.9317	34.4635	131.515	0.507746	0.023		2015-04-25	293	11.1372	34.4454	117.456	0.422529	0.0235
	2013-10-16	293	11.5761	34.4607	117.476	0.442949	0.0562		2014-08-05	295	12.1293	34.4659	112.339	0.440238	0.0316		2014-08-06	294	12.7147	34.4784	111.876	0.438831	0.0302		2015-04-24	294	11.9298	34.4632	131.151	0.505449	0.02		2015-04-25	294	11.1094	34.4455	117.595	0.423388	0.0228
	2013-10-16	294	11.5461	34.46	117.533	0.443312	0.0627		2014-08-05	296	12.1063	34.4647	112.46	0.440995	0.0301		2014-08-06	295	12.6364	34.4769	112.09	0.440159	0.0282		2015-04-24	295	11.9229	34.4621	130.92	0.503996	0.021		2015-04-25	295	11.0977	34.4459	117.158	0.420679	0.0224
	2013-10-16	295	11.5411	34.4602	116.126	0.434306	0.0489		2014-08-05	297	12.057	34.4623	112.481	0.44113	0.0304		2014-08-06	296	12.6201	34.4773	112.103	0.44024	0.0272		2015-04-24	296	11.9022	34.4616	130.896	0.503844	0.0219		2015-04-25	296	11.0838	34.4446	116.759	0.418208	0.0235
	2013-10-16	296	11.5001	34.4594	116.86	0.439007	0.0482		2014-08-05	298	12.0104	34.4638	112.296	0.439962	0.0313		2014-08-06	297	12.6391	34.477	111.788	0.438283	0.029		2015-04-24	297	11.8686	34.4615	130.926	0.504031	0.0216		2015-04-25	297	11.0503	34.4454	116.557	0.416953	0.0244
	2013-10-16	297	11.4925	34.459	116.202	0.434794	0.0334		2014-08-05	299	11.9944	34.4624	112.202	0.439372	0.0311		2014-08-06	298	12.6183	34.4762	112.037	0.439829	0.0284		2015-04-24	298	11.8542	34.4608	130.913	0.503949	0.02		2015-04-25	298	11.0445	34.4449	115.774	0.412097	0.0226
	2013-10-16	298	11.4834	34.4584	115.906	0.432896	0.0417		2014-08-05	300	11.99	34.4622	112.051	0.438422	0.0348		2014-08-06	299	12.6233	34.4765	111.69	0.437678	0.0276		2015-04-24	299	11.8369	34.4602	130.569	0.501787	0.0232		2015-04-25	299	11.0106	34.4431	116.004	0.413524	0.0243
	2013-10-16	299	11.4397	34.4579	115.993	0.433456	0.0399		2014-08-05	301	11.9742	34.4612	112.124	0.438884	0.0339		2014-08-06	300	12.5849	34.476	111.8	0.438357	0.03		2015-04-24	300	11.8181	34.4605	129.8	0.496942	0.0231		2015-04-25	300	10.9866	34.4443	115.208	0.408589	0.0223
	2013-10-16	300	11.3987	34.4563	116.915	0.439356	0.0484		2014-08-05	302	11.9394	34.4611	112.207	0.439404	0.0331		2014-08-06	301	12.5669	34.4755	111.748	0.438039	0.0285		2015-04-24	301	11.7869	34.4593	128.843	0.490913	0.022		2015-04-25	301	10.9265	34.4436	115.395	0.409752	0.0248
	2013-10-16	301	11.3475	34.4565	117.164	0.440952	0.0517		2014-08-05	303	11.9148	34.4609	112.139	0.438974	0.0319		2014-08-06	302	12.5302	34.475	111.849	0.438663	0.0268		2015-04-24	302	11.7486	34.4583	128.068	0.486027	0.0228		2015-04-25	302	10.9117	34.4435	115.08	0.407796	0.0249
	2013-10-16	302	11.334	34.4556	114.906	0.426501	0.0471		2014-08-05	304	11.8737	34.46	111.969	0.437902	0.0301		2014-08-06	303	12.5079	34.4742	111.92	0.439105	0.0267		2015-04-24	303	11.7255	34.459	127.376	0.481668	0.0213		2015-04-25	303	10.9047	34.4431	114.889	0.406613	0.0236
	2013-10-16	303	11.327	34.4556	115.396	0.429632	0.0681		2014-08-05	305	11.8546	34.4594	112.023	0.438242	0.0298		2014-08-06	304	12.4681	34.4742	112.015	0.439691	0.0276		2015-04-24	304	11.7158	34.4589	126.855	0.478387	0.0198		2015-04-25	304	10.8909	34.4422	114.843	0.406329	0.0231
	2013-10-16	304	11.3159	34.4552	115.196	0.428353	0.0531		2014-08-05	306	11.829	34.4591	111.92	0.437594	0.0311		2014-08-06	305	12.4429	34.4743	110.971	0.43322	0.0277		2015-04-24	305	11.7058	34.4586	126.233	0.474467	0.0209		2015-04-25	305	10.8823	34.4425	114.867	0.406475	0.022
	2013-10-16	305	11.2987	34.4548	115.237	0.428617	0.0527		2014-08-05	307	11.7902	34.4578	111.525	0.43511	0.0321		2014-08-06	306	12.4276	34.4739	109.254	0.422573	0.0288		2015-04-24	306	11.6982	34.4581	126.002	0.473014	0.0234		2015-04-25	306	10.8786	34.4425	114.599	0.404816	0.0243
	2013-10-16	306	11.2826	34.4544	115.484	0.430199	0.0455		2014-08-05	308	11.733	34.4581	111.511	0.43502	0.0321		2014-08-06	307	12.4024	34.4724	109.552	0.424424	0.0299		2015-04-24	307	11.6879	34.4577	126.401	0.475527	0.0226		2015-04-25	307	10.8745	34.4423	114.738	0.405675	0.0239
	2013-10-16	307	11.2782	34.4536	114.965	0.426877	0.0399		2014-08-05	309	11.691	34.4545	110.685	0.429815	0.0312		2014-08-06	308	12.3507	34.4723	109.403	0.423502	0.0291		2015-04-24	308	11.6761	34.4576	126.385	0.475428	0.0231		2015-04-25	308	10.8708	34.4425	114.458	0.403938	0.0246
	2013-10-16	308	11.2695	34.4534	115.106	0.42778	0.0665		2014-08-05	310	11.6202	34.4567	110.142	0.426395	0.031		2014-08-06	309	12.3404	34.4723	109.243	0.422504	0.0306		2015-04-24	309	11.6394	34.4542	126.224	0.474414	0.0238		2015-04-25	309	10.8685	34.4422	114.47	0.404017	0.0253
	2013-10-16	309	11.264	34.4534	115.518	0.430417	0.0599		2014-08-05	311	11.6002	34.4562	109.881	0.424752	0.0298		2014-08-06	310	12.3034	34.4719	109.027	0.42117	0.0327		2015-04-24	310	11.6158	34.457	126.133	0.47384	0.023		2015-04-25	310	10.8769	34.4417	114.713	0.405523	0.0235
	2013-10-16	310	11.2578	34.4533	115.421	0.429797	0.0526		2014-08-05	312	11.5821	34.4552	109.462	0.422108	0.0288		2014-08-06	311	12.2788	34.4707	109.305	0.422891	0.0291		2015-04-24	311	11.6079	34.4563	125.87	0.472182	0.0232		2015-04-25	311	10.8635	34.4406	114.66	0.405193	0.0229
	2013-10-16	311	11.2526	34.4529	115.182	0.428268	0.0626		2014-08-05	313	11.5176	34.4548	109.224	0.420612	0.0302		2014-08-06	312	12.238	34.469	109.203	0.422261	0.0266		2015-04-24	312	11.583	34.4572	125.406	0.469258	0.023		2015-04-25	312	10.8009	34.4405	114.686	0.405352	0.025
	2013-10-16	312	11.2408	34.4527	114.904	0.426488	0.0584		2014-08-05	314	11.4601	34.4535	108.199	0.414156	0.0326		2014-08-06	313	12.2069	34.4689	109.47	0.423913	0.0301		2015-04-24	313	11.598	34.4508	125.097	0.467313	0.0231		2015-04-25	313	10.7567	34.4393	114.439	0.403819	0.0238
	2013-10-16	313	11.2298	34.4525	114.994	0.427061	0.0525		2014-08-05	315	11.4353	34.4529	107.261	0.408245	0.031		2014-08-06	314	12.2052	34.4682	110.658	0.431282	0.0304		2015-04-24	314	11.4935	34.4518	125.694	0.471074	0.0232		2015-04-25	314	10.7356	34.4405	114.279	0.402828	0.0228
	2013-10-16	314	11.2223	34.4519	114.984	0.426995	0.0423		2014-08-05	316	11.4319	34.4525	107.539	0.409997	0.0294		2014-08-06	315	12.203	34.4676	110.961	0.433158	0.0291		2015-04-24	315	11.4594	34.4536	125.467	0.469639	0.0236		2015-04-25	315	10.7234	34.4391	114.647	0.405114	0.0234
	2013-10-16	315	11.2104	34.4519	115.051	0.427424	0.0443		2014-08-05	317	11.4266	34.4521	107.562	0.410138	0.0306		2014-08-06	316	12.197	34.4672	111.003	0.43342	0.0283		2015-04-24	316	11.4496	34.4546	124.391	0.46286	0.0242		2015-04-25	316	10.7135	34.4396	114.347	0.403251	0.0241
	2013-10-16	316	11.2019	34.4512	114.613	0.424622	0.0481		2014-08-05	318	11.4194	34.4517	107.581	0.41026	0.0291		2014-08-06	317	12.1752	34.4666	110.864	0.43256	0.0286		2015-04-24	317	11.4522	34.4544	122.582	0.451464	0.0222		2015-04-25	317	10.7116	34.4394	114.551	0.404519	0.0231
	2013-10-16	317	11.1774	34.4514	115.297	0.428999	0.0694		2014-08-05	319	11.4097	34.451	107.772	0.41146	0.0302		2014-08-06	318	12.1599	34.4669	110.574	0.430758	0.0305		2015-04-24	318	11.4543	34.4513	122.187	0.44898	0.0232		2015-04-25	318	10.7071	34.4393	114.572	0.404645	0.0235
	2013-10-16	318	11.1617	34.4511	115.392	0.429606	0.0588		2014-08-05	320	11.4043	34.4508	107.832	0.411839	0.0286		2014-08-06	319	12.1502	34.4665	110.341	0.429312	0.0304		2015-04-24	319	11.4223	34.4516	122.3	0.449689	0.0249		2015-04-25	319	10.7104	34.4387	114.561	0.404579	0.0252
	2013-10-16	319	11.1264	34.4506	115.475	0.43014	0.0546		2014-08-05	321	11.3999	34.4503	107.865	0.412051	0.0329		2014-08-06	320	12.1142	34.4645	110.14	0.428071	0.0298		2015-04-24	320	11.3959	34.4503	122.466	0.450738	0.0258		2015-04-25	320	10.6923	34.4387	114.397	0.403561	0.0244
	2013-10-16	320	11.1009	34.4511	115.405	0.429692	0.0511		2014-08-05	322	11.3824	34.4496	107.916	0.412372	0.0313		2014-08-06	321	12.075	34.4649	110.458	0.430041	0.0285		2015-04-24	321	11.3793	34.4519	122.271	0.449507	0.0251		2015-04-25	321	10.6885	34.4387	114.377	0.403436	0.0257
	2013-10-16	321	11.1018	34.4495	114.736	0.425413	0.0595		2014-08-05	323	11.3733	34.4497	107.905	0.412301	0.0327		2014-08-06	322	12.0428	34.4637	110.754	0.431874	0.0272		2015-04-24	322	11.368	34.4511	122.128	0.448605	0.0254		2015-04-25	322	10.6839	34.4385	114.344	0.403231	0.0254
	2013-10-16	322	11.0867	34.4498	114.829	0.426006	0.0438		2014-08-05	324	11.3703	34.4495	107.789	0.41157	0.032		2014-08-06	323	12.0275	34.4632	111.036	0.433626	0.0293		2015-04-24	323	11.3565	34.4516	122.144	0.448705	0.0227		2015-04-25	323	10.6812	34.4381	114.642	0.405081	0.023
	2013-10-16	323	11.0838	34.4495	114.889	0.426389	0.0395		2014-08-05	325	11.3699	34.4492	107.947	0.412564	0.034		2014-08-06	324	12.014	34.463	111.235	0.43486	0.0277		2015-04-24	324	11.3526	34.4513	122.016	0.447902	0.0228		2015-04-25	324	10.6713	34.4381	114.443	0.403845	0.0223
	2013-10-16	324	11.0723	34.4491	114.898	0.426448	0.0627		2014-08-05	326	11.365	34.449	107.955	0.412616	0.0331		2014-08-06	325	12.0009	34.4627	110.934	0.43299	0.029		2015-04-24	325	11.3472	34.4511	121.727	0.44608	0.0228		2015-04-25	325	10.6622	34.4382	114.356	0.40331	0.0243
	2013-10-16	325	11.0169	34.4495	114.317	0.42273	0.0554		2014-08-05	327	11.356	34.4489	107.778	0.411499	0.0311		2014-08-06	326	11.9959	34.4622	110.804	0.432186	0.0291		2015-04-24	326	11.3425	34.4509	121.78	0.446414	0.0232		2015-04-25	326	10.6487	34.4375	114.305	0.402993	0.0233
	2013-10-16	326	11.0074	34.448	114.768	0.425617	0.0569		2014-08-05	328	11.3449	34.4487	107.659	0.410755	0.0298		2014-08-06	327	11.978	34.4613	110.919	0.432896	0.0297		2015-04-24	327	11.3336	34.4506	121.707	0.445957	0.0245		2015-04-25	327	10.6324	34.4373	114.34	0.403211	0.0239
	2013-10-16	327	10.9858	34.4482	114.886	0.426369	0.0535		2014-08-05	329	11.3373	34.4485	107.737	0.411242	0.0297		2014-08-06	328	11.9529	34.4614	110.57	0.430733	0.0285		2015-04-24	328	11.3229	34.4503	121.504	0.444674	0.0245		2015-04-25	328	10.6113	34.4362	114.259	0.402709	0.0247
	2013-10-16	328	10.9735	34.4483	114.918	0.426573	0.0492		2014-08-05	330	11.3356	34.4482	107.759	0.411383	0.0308		2014-08-06	329	11.9413	34.461	110.737	0.431768	0.0293		2015-04-24	329	11.2986	34.4482	121.541	0.444908	0.0259		2015-04-25	329	10.5782	34.437	114.277	0.402815	0.023
	2013-10-16	329	10.9695	34.4483	114.891	0.426402	0.0496		2014-08-05	331	11.3321	34.4479	107.895	0.412237	0.0322		2014-08-06	330	11.9316	34.4602	110.725	0.431693	0.0293		2015-04-24	330	11.2657	34.4489	121.297	0.443373	0.0249		2015-04-25	330	10.575	34.4366	114.291	0.402907	0.024
	2013-10-16	330	10.9739	34.4471	114.371	0.423073	0.0516		2014-08-05	332	11.3226	34.4475	107.816	0.411743	0.0291		2014-08-06	331	11.9229	34.4604	110.564	0.430696	0.0287		2015-04-24	331	11.2473	34.4493	120.896	0.440848	0.023		2015-04-25	331	10.5627	34.435	114.409	0.403634	0.024
	2013-10-16	331	10.9676	34.4473	114.36	0.423007	0.0556		2014-08-05	333	11.3115	34.4474	108.069	0.413334	0.0293		2014-08-06	332	11.9191	34.4601	110.653	0.43125	0.0291		2015-04-24	332	11.2374	34.4482	121.056	0.441856	0.0231		2015-04-25	332	10.5383	34.4357	114.338	0.403198	0.024
	2013-10-16	332	10.9641	34.4472	114.453	0.4236	0.0613		2014-08-05	334	11.2966	34.4473	108.158	0.413893	0.03		2014-08-06	333	11.9047	34.4598	110.542	0.430559	0.0277		2015-04-24	333	11.1968	34.4463	120.795	0.440209	0.0209		2015-04-25	333	10.5323	34.4358	114.076	0.401573	0.0228
	2013-10-16	333	10.9608	34.4472	114.624	0.424694	0.0519		2014-08-05	335	11.2877	34.447	108.029	0.413084	0.0305		2014-08-06	334	11.8921	34.4594	110.656	0.431269	0.0272		2015-04-24	334	11.1646	34.4474	120.741	0.439869	0.0227		2015-04-25	334	10.505	34.4353	114.071	0.40154	0.0241
	2013-10-16	334	10.9539	34.4466	114.16	0.421721	0.0561		2014-08-05	336	11.2811	34.447	107.752	0.411339	0.0308		2014-08-06	335	11.8825	34.4593	110.461	0.43006	0.0282		2015-04-24	335	11.1562	34.4478	120.779	0.44011	0.0225		2015-04-25	335	10.4863	34.4347	114.133	0.401923	0.0233
	2013-10-16	335	10.9089	34.4468	114.341	0.422881	0.0638		2014-08-05	337	11.2743	34.4467	107.294	0.408451	0.0302		2014-08-06	336	11.8713	34.4591	110.562	0.430683	0.0284		2015-04-24	336	11.1661	34.4473	120.006	0.435241	0.0219		2015-04-25	336	10.4725	34.435	114.051	0.401414	0.0229
	2013-10-16	336	10.8792	34.447	114.108	0.421391	0.0586		2014-08-05	338	11.2669	34.4469	107.361	0.408874	0.0299		2014-08-06	337	11.8584	34.4589	110.442	0.429941	0.0282		2015-04-24	337	11.1382	34.4458	120.448	0.438024	0.0229		2015-04-25	337	10.4681	34.4346	114.147	0.402009	0.0249
	2013-10-16	337	10.8386	34.4456	112.97	0.414107	0.0683		2014-08-05	339	11.2651	34.4466	107.307	0.408534	0.0292		2014-08-06	338	11.8182	34.4574	110.064	0.427597	0.0304		2015-04-24	338	11.0923	34.4435	120.414	0.437807	0.0225		2015-04-25	338	10.4635	34.4337	114.083	0.401612	0.027
	2013-10-16	338	10.774	34.4457	113.25	0.4159	0.0588		2014-08-05	340	11.2556	34.446	107.265	0.408271	0.0282		2014-08-06	339	11.7758	34.4575	109.984	0.427099	0.0285		2015-04-24	339	11.0398	34.4434	120.339	0.437338	0.023		2015-04-25	339	10.4541	34.4342	114.277	0.402815	0.0261
	2013-10-16	339	10.7518	34.4462	113.384	0.416757	0.0558		2014-08-05	341	11.2363	34.4459	107.338	0.408726	0.033		2014-08-06	340	11.7465	34.4575	109.841	0.426213	0.0282		2015-04-24	340	10.9904	34.4463	119.301	0.430794	0.0236		2015-04-25	340	10.4494	34.4343	114.272	0.402788	0.0239
	2013-10-16	340	10.7501	34.4454	112.674	0.412215	0.0497		2014-08-05	342	11.2036	34.4449	107.274	0.408329	0.0312		2014-08-06	341	11.7213	34.4574	109.401	0.423489	0.029		2015-04-24	341	10.9445	34.4422	119.204	0.430185	0.0238		2015-04-25	341	10.4669	34.4336	114.235	0.402557	0.0225
	2013-10-16	341	10.7465	34.4448	112.042	0.408167	0.056		2014-08-05	343	11.144	34.4453	106.787	0.405261	0.0302		2014-08-06	342	11.7167	34.4565	109.182	0.42213	0.0293		2015-04-24	342	10.9083	34.443	119.072	0.429353	0.0246		2015-04-25	342	10.4324	34.433	114.166	0.402128	0.0228
	2013-10-16	342	10.7502	34.4439	112.333	0.410032	0.0611		2014-08-05	344	11.1247	34.4446	106.188	0.401487	0.0362		2014-08-06	343	11.6897	34.4557	109.076	0.421469	0.0319		2015-04-24	343	10.8944	34.4435	118.904	0.428298	0.0251		2015-04-25	343	10.4096	34.4332	114.331	0.403152	0.0232
	2013-10-16	343	10.7422	34.4441	112.601	0.411746	0.0608		2014-08-05	345	11.1154	34.4446	106.243	0.401834	0.0349		2014-08-06	344	11.6692	34.4558	109.394	0.423445	0.0298		2015-04-24	344	10.869	34.4433	118.429	0.425304	0.0232		2015-04-25	344	10.3559	34.4308	114.152	0.402042	0.0237
	2013-10-16	344	10.7051	34.444	112.509	0.41116	0.0608		2014-08-05	346	11.106	34.4443	106.31	0.402251	0.0315		2014-08-06	345	11.6574	34.4559	109.268	0.42266	0.0309		2015-04-24	345	10.8917	34.4406	117.807	0.421384	0.0248		2015-04-25	345	10.2623	34.4313	114.257	0.402696	0.0241
	2013-10-16	345	10.6754	34.4436	112.043	0.408173	0.0335		2014-08-05	347	11.0775	34.4441	106.292	0.402142	0.0286		2014-08-06	346	11.6392	34.4553	108.806	0.419798	0.0321		2015-04-24	346	10.8438	34.4425	118.303	0.424507	0.0247		2015-04-25	346	10.2442	34.4325	113.906	0.400515	0.0244
	2013-10-16	346	10.6651	34.4438	112.302	0.409835	0.0442		2014-08-05	348	11.0616	34.4436	105.947	0.399966	0.0296		2014-08-06	347	11.6197	34.4546	107.918	0.414294	0.0337		2015-04-24	347	10.8284	34.4418	118.203	0.42388	0.0236		2015-04-25	347	10.2373	34.4301	113.585	0.398527	0.0239
	2013-10-16	347	10.6629	34.4435	112.21	0.409241	0.0479		2014-08-05	349	11.0374	34.4429	105.908	0.399722	0.0305		2014-08-06	348	11.5876	34.4544	108.31	0.416725	0.0308		2015-04-24	348	10.809	34.4419	118.115	0.423324	0.0224		2015-04-25	348	10.2118	34.4316	113.938	0.400714	0.0249
	2013-10-16	348	10.6564	34.4435	111.932	0.407468	0.0424		2014-08-05	350	10.9802	34.4436	105.811	0.399106	0.0283		2014-08-06	349	11.5605	34.4539	108.097	0.415403	0.028		2015-04-24	349	10.7907	34.4414	117.601	0.420084	0.0215		2015-04-25	349	10.2037	34.4309	113.523	0.398144	0.024
	2013-10-16	349	10.6521	34.4428	111.992	0.40785	0.0505		2014-08-05	351	10.9535	34.4434	105.214	0.395345	0.0288		2014-08-06	350	11.5445	34.4538	107.901	0.414188	0.0314		2015-04-24	350	10.7396	34.4379	117.681	0.420593	0.0206		2015-04-25	350	10.1427	34.4278	113.627	0.398785	0.0222
	2013-10-16	350	10.6413	34.4425	111.586	0.405253	0.048		2014-08-05	352	10.9435	34.443	104.536	0.391078	0.0312		2014-08-06	351	11.5242	34.4534	107.877	0.414038	0.0308		2015-04-24	351	10.6921	34.439	117.775	0.421185	0.0214		2015-04-25	351	10.1234	34.4307	113.323	0.396902	0.0224
	2013-10-16	351	10.633	34.4425	112.071	0.408351	0.0513		2014-08-05	353	10.94	34.4424	104.597	0.391463	0.0323		2014-08-06	352	11.5017	34.4533	107.445	0.411357	0.0305		2015-04-24	352	10.6565	34.4388	117.746	0.420998	0.0238		2015-04-25	352	10.1278	34.4303	112.838	0.393896	0.0254
	2013-10-16	352	10.6176	34.4425	111.898	0.40725	0.051		2014-08-05	354	10.928	34.4418	104.529	0.391033	0.03		2014-08-06	353	11.5182	34.452	106.806	0.407399	0.0299		2015-04-24	353	10.629	34.438	117.769	0.421144	0.024		2015-04-25	353	10.1053	34.4292	113.068	0.395323	0.0229
	2013-10-16	353	10.6047	34.4426	111.943	0.407534	0.0487		2014-08-05	355	10.9	34.4412	104.384	0.390121	0.0307		2014-08-06	354	11.4621	34.452	107.07	0.409032	0.0304		2015-04-24	354	10.5785	34.4365	117.806	0.421378	0.0245		2015-04-25	354	10.1034	34.4299	112.769	0.393466	0.0224
	2013-10-16	354	10.5982	34.4417	111.292	0.403367	0.0523		2014-08-05	356	10.8798	34.4412	104.537	0.391084	0.0307		2014-08-06	355	11.4347	34.4515	106.934	0.408191	0.0336		2015-04-24	355	10.5233	34.4368	117.814	0.421425	0.0248		2015-04-25	355	10.0924	34.4296	112.682	0.392931	0.024
	2013-10-16	355	10.5882	34.4419	111.85	0.40694	0.0364		2014-08-05	357	10.8729	34.4405	104.586	0.391392	0.0322		2014-08-06	356	11.3981	34.4507	107.053	0.408926	0.032		2015-04-24	356	10.5022	34.4372	118.063	0.422996	0.0258		2015-04-25	356	10.0697	34.4295	112.704	0.393063	0.0243
	2013-10-16	356	10.5873	34.4419	112.071	0.408351	0.047		2014-08-05	358	10.8488	34.4398	104.746	0.3924	0.032		2014-08-06	357	11.3686	34.4505	107.038	0.408833	0.0314		2015-04-24	357	10.4937	34.4368	117.657	0.420441	0.026		2015-04-25	357	10.0536	34.43	111.808	0.387507	0.0237
	2013-10-16	357	10.5865	34.442	112.039	0.408147	0.0459		2014-08-05	359	10.8358	34.44	104.726	0.392271	0.0323		2014-08-06	358	11.3644	34.4494	106.886	0.407891	0.0309		2015-04-24	358	10.4612	34.4347	117.57	0.41989	0.0262		2015-04-25	358	10.0397	34.4295	111.032	0.382697	0.0261
	2013-10-16	358	10.5863	34.4417	111.769	0.40642	0.0491		2014-08-05	360	10.8283	34.4396	104.782	0.392624	0.0317		2014-08-06	359	11.3538	34.449	107.176	0.409693	0.0299		2015-04-24	359	10.4368	34.4364	117.595	0.420048	0.025		2015-04-25	359	10.0263	34.4299	111.13	0.383305	0.027
	2013-10-16	359	10.5877	34.4411	111.276	0.403268	0.0757		2014-08-05	361	10.8226	34.4394	104.809	0.392797	0.0303		2014-08-06	360	11.319	34.4485	107.297	0.410441	0.0305		2015-04-24	360	10.4332	34.436	117.259	0.417933	0.025		2015-04-25	360	10.0227	34.4301	110.43	0.378964	0.0241
	2013-10-16	360	10.5844	34.4414	111.61	0.405404	0.0632		2014-08-05	362	10.8051	34.4389	104.941	0.393625	0.0283		2014-08-06	361	11.2875	34.4489	106.997	0.408583	0.0302		2015-04-24	361	10.4258	34.4347	117.005	0.416334	0.0244		2015-04-25	361	10.011	34.4299	110.358	0.378522	0.0247
	2013-10-16	361	10.5827	34.4413	111.458	0.404429	0.0613		2014-08-05	363	10.7793	34.4384	104.521	0.390981	0.0301		2014-08-06	362	11.2453	34.4476	106.609	0.406177	0.0317		2015-04-24	362	10.3921	34.433	117.107	0.416972	0.0227		2015-04-25	362	10.0052	34.4298	110.387	0.3787	0.0245
	2013-10-16	362	10.5794	34.4413	111.544	0.404982	0.0627		2014-08-05	364	10.7662	34.4382	104.652	0.391809	0.0311		2014-08-06	363	11.2293	34.4478	106.115	0.403116	0.0323		2015-04-24	363	10.3586	34.4344	116.917	0.415777	0.0218		2015-04-25	363	10	34.4296	109.873	0.375516	0.0246
	2013-10-16	363	10.5762	34.4411	111.478	0.40456	0.049		2014-08-05	365	10.761	34.4383	104.573	0.391309	0.0326		2014-08-06	364	11.2267	34.4474	105.941	0.402031	0.0302		2015-04-24	364	10.3177	34.4337	116.53	0.41334	0.0233		2015-04-25	364	9.9917	34.4293	109.976	0.37615	0.0262
	2013-10-16	364	10.5733	34.4408	111.437	0.404297	0.0617		2014-08-05	366	10.7567	34.4381	104.596	0.391456	0.032		2014-08-06	365	11.2188	34.4468	106.01	0.402461	0.0271		2015-04-24	365	10.2904	34.4343	116.067	0.410422	0.0209		2015-04-25	365	9.9855	34.4297	110.184	0.377438	0.0246
	2013-10-16	365	10.5634	34.441	111.318	0.403532	0.0702		2014-08-05	367	10.7518	34.4378	104.502	0.390866	0.0302		2014-08-06	366	11.2036	34.4465	105.92	0.401907	0.0292		2015-04-24	366	10.2687	34.4331	116.026	0.410164	0.0232		2015-04-25	366	9.9878	34.4291	109.843	0.375324	0.0253
	2013-10-16	366	10.5484	34.4408	111.238	0.403024	0.0624		2014-08-05	368	10.7493	34.4375	104.471	0.390667	0.0302		2014-08-06	367	11.1762	34.446	105.824	0.401308	0.0282		2015-04-24	367	10.246	34.4323	116.121	0.410762	0.0237		2015-04-25	367	9.9701	34.429	110.262	0.377927	0.0214
	2013-10-16	367	10.5315	34.4408	111.206	0.40282	0.0657		2014-08-05	369	10.7431	34.4373	104.428	0.390397	0.0292		2014-08-06	368	11.1419	34.446	105.92	0.401907	0.0276		2015-04-24	368	10.2124	34.4324	115.899	0.409362	0.0235		2015-04-25	368	9.9558	34.4293	110.21	0.377603	0.022
	2013-10-16	368	10.523	34.4403	111.396	0.404033	0.068		2014-08-05	370	10.7275	34.4366	104.615	0.391572	0.0278		2014-08-06	369	11.0982	34.4443	105.059	0.396564	0.0309		2015-04-24	369	10.1684	34.4314	115.776	0.408588	0.0236		2015-04-25	369	9.9566	34.4299	109.292	0.371908	0.0237
	2013-10-16	369	10.5034	34.4405	111.632	0.405543	0.0679		2014-08-05	371	10.7125	34.4361	104.787	0.392656	0.0269		2014-08-06	370	11.0397	34.4454	105.028	0.396371	0.0318		2015-04-24	370	10.1288	34.4318	115.451	0.406543	0.0231		2015-04-25	370	9.9497	34.426	109.257	0.37169	0.0227
	2013-10-16	370	10.4748	34.4405	111.411	0.404132	0.0617		2014-08-05	372	10.7048	34.4357	105.294	0.395852	0.0284		2014-08-06	371	11.0209	34.445	105.1	0.39682	0.0305		2015-04-24	371	10.0816	34.4309	114.921	0.403204	0.0238		2015-04-25	371	9.9336	34.4297	109.341	0.372212	0.0253
	2013-10-16	371	10.4609	34.44	110.998	0.401488	0.0454		2014-08-05	373	10.6934	34.4353	105.664	0.398182	0.0289		2014-08-06	372	10.996	34.445	104.911	0.395648	0.0313		2015-04-24	372	10.0497	34.4306	114.88	0.402946	0.023		2015-04-25	372	9.9099	34.427	109.263	0.37173	0.0262
	2013-10-16	372	10.3964	34.4397	110.914	0.400948	0.0401		2014-08-05	374	10.6881	34.4347	106.085	0.400833	0.0267		2014-08-06	373	10.9832	34.4446	103.936	0.3896	0.03		2015-04-24	373	10.0359	34.4296	115.248	0.40526	0.0221		2015-04-25	373	9.8608	34.4292	109.14	0.37097	0.0261
	2013-10-16	373	10.3797	34.4388	110.645	0.399227	0.0487		2014-08-05	375	10.681	34.4346	106.045	0.400582	0.027		2014-08-06	374	10.9826	34.4439	103.679	0.388011	0.0301		2015-04-24	374	10.0095	34.4297	115.715	0.408207	0.0233		2015-04-25	374	9.7782	34.4269	108.556	0.36735	0.025
	2013-10-16	374	10.3597	34.4389	110.288	0.396946	0.0445		2014-08-05	376	10.6719	34.4342	106.334	0.402405	0.0273		2014-08-06	375	10.9678	34.4432	103.944	0.38965	0.0302		2015-04-24	375	10.0034	34.4297	115.941	0.409631	0.0225		2015-04-25	375	9.7425	34.4279	108.543	0.367264	0.0245
	2013-10-16	375	10.3379	34.4387	110.202	0.396392	0.0437		2014-08-05	377	10.6505	34.4333	106.425	0.402976	0.0285		2014-08-06	376	10.9311	34.4431	103.786	0.388672	0.0313		2015-04-24	376	9.9935	34.4297	115.64	0.407733	0.0247		2015-04-25	376	9.716	34.4269	108.748	0.368539	0.0241
	2013-10-16	376	10.2966	34.4388	109.535	0.392127	0.0553		2014-08-05	378	10.6247	34.4336	106.463	0.40322	0.0258		2014-08-06	377	10.906	34.4435	103.255	0.38538	0.0352		2015-04-24	377	9.9739	34.4257	115.813	0.408823	0.0259		2015-04-25	377	9.7002	34.4274	108.746	0.368526	0.0237
	2013-10-16	377	10.2883	34.4384	109.69	0.393116	0.0639		2014-08-05	379	10.6108	34.4336	106.426	0.402983	0.0312		2014-08-06	378	10.8971	34.4427	102.94	0.383429	0.0294		2015-04-24	378	9.9269	34.4262	116.081	0.41051	0.0271		2015-04-25	378	9.6958	34.4271	108.881	0.369365	0.0247
	2013-10-16	378	10.2826	34.4382	109.608	0.392588	0.063		2014-08-05	380	10.6031	34.4334	106.306	0.402225	0.0321		2014-08-06	379	10.8811	34.4421	102.91	0.383242	0.0296		2015-04-24	379	9.9119	34.4282	115.513	0.40693	0.024		2015-04-25	379	9.6976	34.4268	108.778	0.368724	0.0231
	2013-10-16	379	10.2728	34.4377	109.293	0.390577	0.0487		2014-08-05	381	10.584	34.4328	106.292	0.402142	0.0302		2014-08-06	380	10.8523	34.4415	102.846	0.382843	0.0299		2015-04-24	380	9.8482	34.4285	115.245	0.405243	0.0239		2015-04-25	380	9.6827	34.426	108.778	0.368724	0.0238
	2013-10-16	380	10.2544	34.4377	109.253	0.39032	0.0578		2014-08-05	382	10.5447	34.4322	106.097	0.40091	0.0305		2014-08-06	381	10.83	34.4416	102.771	0.382381	0.0292		2015-04-24	381	9.8431	34.429	115.051	0.404018	0.0241		2015-04-25	381	9.6568	34.4261	108.824	0.369008	0.0245
	2013-10-16	381	10.2263	34.4379	109.63	0.392733	0.0525		2014-08-05	383	10.5267	34.4324	106.085	0.400833	0.032		2014-08-06	382	10.8601	34.4414	102.9	0.383179	0.0292		2015-04-24	382	9.8338	34.4274	114.764	0.402214	0.0245		2015-04-25	382	9.6456	34.4264	108.863	0.369252	0.0248
	2013-10-16	382	10.2152	34.4371	109.306	0.390657	0.0647		2014-08-05	384	10.5232	34.4324	105.903	0.39969	0.0309		2014-08-06	383	10.8245	34.4398	103.119	0.384538	0.0297		2015-04-24	383	9.814	34.4265	114.582	0.401065	0.0232		2015-04-25	383	9.6246	34.4246	108.791	0.368803	0.0225
	2013-10-16	383	10.2028	34.4373	109.3	0.390617	0.0675		2014-08-05	385	10.5213	34.432	105.769	0.398843	0.0329		2014-08-06	384	10.772	34.4408	103.145	0.3847	0.0288		2015-04-24	384	9.7974	34.4282	114.377	0.399776	0.0232		2015-04-25	384	9.5918	34.4255	108.963	0.369873	0.0225
	2013-10-16	384	10.1958	34.4369	109.1	0.389338	0.0644		2014-08-05	386	10.5183	34.4317	105.766	0.398824	0.0297		2014-08-06	385	10.7191	34.4408	103.09	0.384358	0.0301		2015-04-24	385	9.7565	34.4264	114.445	0.400204	0.0238		2015-04-25	385	9.5888	34.426	108.609	0.367673	0.0228
	2013-10-16	385	10.1861	34.4367	109.15	0.389661	0.0572		2014-08-05	387	10.5098	34.4317	105.77	0.398849	0.0308		2014-08-06	386	10.6786	34.4404	102.938	0.383416	0.0296		2015-04-24	386	9.7384	34.4272	114.482	0.400438	0.0247		2015-04-25	386	9.5781	34.4243	108.686	0.368156	0.0253
	2013-10-16	386	10.1823	34.4361	108.805	0.387453	0.0652		2014-08-05	388	10.5031	34.4316	105.816	0.399138	0.0288		2014-08-06	387	10.6671	34.4397	101.741	0.375991	0.0298		2015-04-24	387	9.7298	34.4277	114.149	0.398341	0.0234		2015-04-25	387	9.5576	34.4258	108.667	0.368037	0.0253
	2013-10-16	387	10.1658	34.4359	108.982	0.388587	0.0578		2014-08-05	389	10.4964	34.4318	105.986	0.40021	0.028		2014-08-06	388	10.6678	34.4369	101.193	0.372594	0.0297		2015-04-24	388	9.7253	34.4272	113.983	0.397292	0.0226		2015-04-25	388	9.5571	34.4253	108.34	0.366009	0.0233
	2013-10-16	388	10.1479	34.4363	109.211	0.39005	0.037		2014-08-05	390	10.4943	34.4315	105.651	0.398099	0.0291		2014-08-06	389	10.6464	34.4386	101.487	0.37442	0.0277		2015-04-24	389	9.7153	34.4261	113.913	0.396853	0.0228		2015-04-25	389	9.5383	34.4242	108.423	0.366524	0.0222
	2013-10-16	389	10.141	34.4361	109.158	0.389714	0.0472		2014-08-05	391	10.4915	34.431	105.665	0.398188	0.0332		2014-08-06	390	10.6273	34.438	101.541	0.374757	0.0298		2015-04-24	390	9.692	34.4259	113.863	0.396536	0.023		2015-04-25	390	9.5224	34.4254	108.353	0.366088	0.0217
	2013-10-16	390	10.1433	34.4353	108.848	0.387729	0.062		2014-08-05	392	10.467	34.4309	105.565	0.397559	0.0313		2014-08-06	391	10.6124	34.4386	101.503	0.37452	0.0314		2015-04-24	391	9.666	34.426	113.761	0.395892	0.0244		2015-04-25	391	9.5158	34.4248	108.108	0.364568	0.0241
	2013-10-16	391	10.1402	34.4355	109.102	0.389351	0.0645		2014-08-05	393	10.4068	34.4306	105.599	0.397771	0.0299		2014-08-06	392	10.602	34.4379	101.412	0.373953	0.0304		2015-04-24	392	9.6337	34.4259	113.595	0.394849	0.025		2015-04-25	392	9.504	34.4251	108.24	0.365388	0.0214
	2013-10-16	392	10.1354	34.4357	109.087	0.389259	0.0661		2014-08-05	394	10.3641	34.4304	105.406	0.396558	0.0297		2014-08-06	393	10.6202	34.4369	101.404	0.373903	0.0282		2015-04-24	393	9.6241	34.4267	113.324	0.393144	0.0247		2015-04-25	393	9.5031	34.4244	107.954	0.363617	0.026
	2013-10-16	393	10.125	34.4344	109.272	0.390439	0.0652		2014-08-05	395	10.3392	34.4303	105.326	0.396051	0.03		2014-08-06	394	10.5896	34.4364	101.643	0.375387	0.0288		2015-04-24	394	9.6174	34.4258	113.302	0.393003	0.0254		2015-04-25	394	9.4366	34.4237	108.059	0.364264	0.0247
	2013-10-16	394	10.1046	34.4347	109.192	0.389931	0.06		2014-08-05	396	10.3344	34.4299	105.377	0.396372	0.0299		2014-08-06	395	10.5663	34.4364	101.715	0.375836	0.0313		2015-04-24	395	9.6144	34.4263	113.308	0.393038	0.0226		2015-04-25	395	9.4205	34.4251	107.67	0.361853	0.0233
	2013-10-16	395	10.0913	34.4344	108.679	0.386648	0.0488		2014-08-05	397	10.3247	34.4289	105.28	0.395763	0.031		2014-08-06	396	10.5473	34.4356	102.004	0.377625	0.0311		2015-04-24	396	9.6121	34.4261	113.196	0.392335	0.0225		2015-04-25	396	9.415	34.4246	108.086	0.364436	0.0239
	2013-10-16	396	10.0658	34.4344	109.156	0.389701	0.0401		2014-08-05	398	10.2892	34.4291	105.341	0.396148	0.0295		2014-08-06	397	10.5295	34.4353	102.184	0.378741	0.0304		2015-04-24	397	9.6063	34.4253	113.184	0.392259	0.0248		2015-04-25	397	9.4164	34.4245	107.978	0.363762	0.0242
	2013-10-16	397	10.0594	34.4343	108.886	0.387973	0.0271		2014-08-05	399	10.2579	34.429	105.247	0.395557	0.0285		2014-08-06	398	10.5115	34.435	102.215	0.378934	0.0305		2015-04-24	398	9.5826	34.4252	113.188	0.392283	0.0253		2015-04-25	398	9.4116	34.4242	107.839	0.362903	0.0232
	2013-10-16	398	10.0441	34.4341	109.115	0.389437	0.0456		2014-08-05	400	10.2438	34.4285	104.841	0.392996	0.0285		2014-08-06	399	10.4884	34.4335	101.974	0.377438	0.0285		2015-04-24	399	9.5726	34.4246	113.184	0.392259	0.0237		2015-04-25	399	9.3974	34.4246	107.738	0.362276	0.0234
	2013-10-16	399	10.029	34.4344	109.13	0.389529	0.0561		2014-08-05	401	10.2156	34.429	104.774	0.392579	0.0296		2014-08-06	400	10.402	34.4335	102.151	0.378535	0.0316		2015-04-24	400	9.5226	34.4249	113.094	0.391691	0.022		2015-04-25	400	9.3777	34.4242	107.353	0.359891	0.0221
	2013-10-16	400	10.0247	34.4344	109.133	0.389549	0.0578		2014-08-05	402	10.1824	34.4278	104.302	0.389601	0.0285		2014-08-06	401	10.3909	34.4333	102.185	0.378747	0.033		2015-04-24	401	9.5128	34.4258	112.983	0.390994	0.021		2015-04-25	401	9.3559	34.4248	107.271	0.359382	0.0244
	2013-10-16	401	10.0252	34.4337	108.617	0.386246	0.0612		2014-08-05	403	10.1314	34.4288	104.305	0.389621	0.0289		2014-08-06	402	10.3823	34.4327	102.239	0.379084	0.0318		2015-04-24	402	9.5041	34.4255	112.871	0.390285	0.0208		2015-04-25	402	9.3295	34.4223	106.854	0.356792	0.0233
	2013-10-16	402	10.0208	34.4339	109.069	0.38914	0.0595		2014-08-05	404	10.1044	34.4284	103.692	0.385757	0.0304		2014-08-06	403	10.381	34.4323	102.945	0.38346	0.0289		2015-04-24	403	9.4981	34.4256	112.704	0.389236	0.0237		2015-04-25	403	9.2976	34.4237	106.883	0.356977	0.026
	2013-10-16	403	10.0174	34.4337	108.953	0.388402	0.0612		2014-08-05	405	10.0892	34.4279	103.345	0.383575	0.0279		2014-08-06	404	10.396	34.4304	103.49	0.386839	0.0261		2015-04-24	404	9.4862	34.4249	112.412	0.387396	0.0249		2015-04-25	404	9.293	34.4253	106.879	0.356951	0.0243
	2013-10-16	404	10.0169	34.4332	108.348	0.384525	0.0624		2014-08-05	406	10.0643	34.4273	103.277	0.383145	0.0271		2014-08-06	405	10.3685	34.4309	103.432	0.386477	0.0308		2015-04-24	405	9.4643	34.4249	112.46	0.387695	0.0246		2015-04-25	405	9.2703	34.4248	106.884	0.356984	0.0236
	2013-10-16	405	9.9887	34.4336	107.873	0.381486	0.0522		2014-08-05	407	10.0308	34.4262	103.143	0.382298	0.0269		2014-08-06	406	10.3571	34.4311	103.204	0.385062	0.0316		2015-04-24	406	9.446	34.4242	112.337	0.386922	0.024		2015-04-25	406	9.2679	34.4247	106.601	0.355226	0.0232
	2013-10-16	406	9.9824	34.4335	107.811	0.381091	0.0554		2014-08-05	408	10.0033	34.4269	103.521	0.384685	0.0283		2014-08-06	407	10.3474	34.4311	103.226	0.385199	0.0288		2015-04-24	407	9.4323	34.4253	112.383	0.387215	0.0251		2015-04-25	407	9.2611	34.4239	106.588	0.355147	0.0238
	2013-10-16	407	9.9784	34.4335	108.164	0.383352	0.0553		2014-08-05	409	9.9875	34.4267	103.578	0.385038	0.0307		2014-08-06	408	10.3434	34.4307	103.472	0.386727	0.0294		2015-04-24	408	9.4244	34.4247	112.301	0.386693	0.0239		2015-04-25	408	9.2428	34.4235	106.743	0.356105	0.0248
	2013-10-16	408	9.9756	34.4327	108.175	0.383418	0.0611		2014-08-05	410	9.9674	34.4256	103.011	0.38147	0.0302		2014-08-06	409	10.3418	34.4294	103.412	0.386352	0.0302		2015-04-24	409	9.4156	34.4244	111.931	0.384367	0.0246		2015-04-25	409	9.2346	34.4245	106.499	0.354592	0.0239
	2013-10-16	409	9.9619	34.4332	108.536	0.385732	0.0516		2014-08-05	411	9.9147	34.4265	102.939	0.381014	0.027		2014-08-06	410	10.2952	34.4301	103.56	0.387269	0.0315		2015-04-24	410	9.3885	34.4231	112.004	0.384824	0.0243		2015-04-25	410	9.2185	34.4229	106.214	0.352828	0.0243
	2013-10-16	410	9.9555	34.4328	108.339	0.384473	0.0622		2014-08-05	412	9.8998	34.4261	102.47	0.378062	0.026		2014-08-06	411	10.2776	34.4302	103.493	0.386857	0.0293		2015-04-24	411	9.379	34.4244	111.841	0.383799	0.0243		2015-04-25	411	9.2052	34.4241	106.328	0.353535	0.0235
	2013-10-16	411	9.9402	34.4328	108.354	0.384565	0.0676		2014-08-05	413	9.8956	34.426	102.179	0.376227	0.0276		2014-08-06	412	10.2532	34.43	103.282	0.385548	0.031		2015-04-24	412	9.3695	34.4235	111.863	0.383939	0.0253		2015-04-25	412	9.1988	34.4245	106.24	0.352987	0.0244
	2013-10-16	412	9.9184	34.4326	108.238	0.38382	0.0546		2014-08-05	414	9.8858	34.4256	102.177	0.376214	0.0279		2014-08-06	413	10.2204	34.4293	102.685	0.381845	0.0303		2015-04-24	413	9.363	34.424	112.039	0.385047	0.024		2015-04-25	413	9.195	34.4241	106.273	0.353192	0.0241
	2013-10-16	413	9.8954	34.4321	107.952	0.381994	0.0432		2014-08-05	415	9.8749	34.4246	102.008	0.375148	0.0286		2014-08-06	414	10.1784	34.4298	102.562	0.381085	0.0294		2015-04-24	414	9.3584	34.4237	112.214	0.386148	0.0222		2015-04-25	414	9.1754	34.4237	106.44	0.354229	0.0227
	2013-10-16	414	9.8582	34.4324	107.637	0.379977	0.0533		2014-08-05	416	9.8347	34.4251	102.137	0.375964	0.0301		2014-08-06	415	10.1549	34.4294	102.42	0.380206	0.0289		2015-04-24	415	9.3446	34.4237	112.32	0.386816	0.0213		2015-04-25	415	9.1647	34.4239	106.071	0.351943	0.0232
	2013-10-16	415	9.8118	34.4334	107.424	0.378612	0.0619		2014-08-05	417	9.8057	34.4258	102.236	0.376586	0.0293		2014-08-06	416	10.1413	34.4274	102.312	0.379532	0.0271		2015-04-24	416	9.321	34.4223	112.213	0.386142	0.0218		2015-04-25	416	9.1016	34.4229	105.982	0.351388	0.022
	2013-10-16	416	9.7974	34.4336	106.791	0.374564	0.052		2014-08-05	418	9.7906	34.4251	101.544	0.372228	0.028		2014-08-06	417	10.1189	34.4291	102.385	0.379987	0.027		2015-04-24	417	9.2807	34.4243	111.968	0.384596	0.0227		2015-04-25	417	9.0726	34.4246	105.831	0.35045	0.0227
	2013-10-16	417	9.7897	34.4328	105.788	0.368143	0.0524		2014-08-05	419	9.7576	34.4252	101.253	0.370393	0.0299		2014-08-06	418	10.1126	34.4286	102.205	0.378872	0.0267		2015-04-24	418	9.2636	34.4248	111.405	0.381051	0.0212		2015-04-25	418	9.0624	34.4247	105.631	0.349214	0.0248
	2013-10-16	418	9.7485	34.4337	104.991	0.36304	0.0507		2014-08-05	420	9.7483	34.4248	101.063	0.369199	0.0278		2014-08-06	419	10.0957	34.4275	102.035	0.377818	0.0258		2015-04-24	419	9.2465	34.4248	110.908	0.377922	0.0218		2015-04-25	419	9.053	34.4244	105.458	0.348137	0.024
	2013-10-16	419	9.7345	34.4325	105.732	0.367787	0.0656		2014-08-05	421	9.7426	34.4245	101.073	0.369257	0.0311		2014-08-06	420	10.0599	34.4283	101.82	0.376484	0.0293		2015-04-24	420	9.2487	34.4238	110.697	0.376592	0.0236		2015-04-25	420	9.0335	34.423	105.538	0.348633	0.0231
	2013-10-16	420	9.7101	34.4327	105.741	0.367839	0.0794		2014-08-05	422	9.738	34.4243	101.027	0.368968	0.0278		2014-08-06	421	10.0369	34.4279	101.519	0.37462	0.0303		2015-04-24	421	9.2314	34.4247	110.574	0.375819	0.0241		2015-04-25	421	9.0021	34.4244	105.559	0.348765	0.0218
	2013-10-16	421	9.697	34.4322	105.771	0.368037	0.0744		2014-08-05	423	9.727	34.4241	100.834	0.367755	0.0274		2014-08-06	422	10.0173	34.4272	101.303	0.37328	0.0307		2015-04-24	422	9.2222	34.424	110.657	0.37634	0.0257		2015-04-25	422	8.9832	34.4245	104.762	0.343823	0.0237
	2013-10-16	422	9.6866	34.4307	105.942	0.369132	0.0583		2014-08-05	424	9.7024	34.424	100.74	0.367165	0.0284		2014-08-06	423	9.9764	34.4281	101.347	0.373554	0.0295		2015-04-24	423	9.1974	34.4226	110.812	0.377313	0.0265		2015-04-25	423	8.967	34.4248	104.851	0.344378	0.0261
	2013-10-16	423	9.6559	34.4312	106.512	0.372777	0.0567		2014-08-05	425	9.6895	34.4238	100.666	0.366696	0.0268		2014-08-06	424	9.9501	34.4273	101.015	0.37149	0.0273		2015-04-24	424	9.1861	34.4245	110.505	0.375379	0.025		2015-04-25	424	8.9649	34.4248	104.561	0.342581	0.0228
	2013-10-16	424	9.6362	34.4315	106.312	0.371498	0.0594		2014-08-05	426	9.6749	34.4237	100.588	0.366202	0.029		2014-08-06	425	9.928	34.4268	101.039	0.37164	0.0268		2015-04-24	425	9.163	34.4219	110.643	0.376252	0.0253		2015-04-25	425	8.9607	34.4244	104.579	0.342687	0.0229
	2013-10-16	425	9.6228	34.4316	106.215	0.370879	0.0687		2014-08-05	427	9.663	34.4237	100.488	0.365573	0.0302		2014-08-06	426	9.9146	34.4268	100.677	0.369396	0.0308		2015-04-24	426	9.1263	34.4242	110.573	0.375807	0.0231		2015-04-25	426	8.9524	34.4246	104.357	0.341313	0.0232
	2013-10-16	426	9.6074	34.4312	106.419	0.372184	0.0672		2014-08-05	428	9.6491	34.4236	100.298	0.364379	0.0304		2014-08-06	427	9.897	34.4263	100.629	0.369103	0.028		2015-04-24	427	9.1112	34.4245	110.454	0.375063	0.023		2015-04-25	427	8.9468	34.4246	104.388	0.341504	0.022
	2013-10-16	427	9.5682	34.4308	106.21	0.370846	0.0369		2014-08-05	429	9.6139	34.4228	100.264	0.364161	0.0309		2014-08-06	428	9.8712	34.4263	100.716	0.369639	0.0274		2015-04-24	428	9.0955	34.4253	110.255	0.373803	0.0244		2015-04-25	428	8.9383	34.424	104.339	0.3412	0.0241
	2013-10-16	428	9.5766	34.4291	105.637	0.367174	0.0558		2014-08-05	430	9.591	34.4236	100.007	0.362544	0.0293		2014-08-06	429	9.841	34.4263	100.704	0.369564	0.0262		2015-04-24	429	9.0843	34.4229	110.015	0.372292	0.0244		2015-04-25	429	8.9257	34.4245	104.249	0.340645	0.0239
	2013-10-16	429	9.5488	34.4295	106.085	0.370041	0.0564		2014-08-05	431	9.5703	34.4236	100.115	0.363224	0.0282		2014-08-06	430	9.7955	34.426	100.203	0.366459	0.0285		2015-04-24	430	9.0424	34.4239	110.02	0.372327	0.0242		2015-04-25	430	8.9104	34.4246	104.146	0.340005	0.0233
	2013-10-16	430	9.534	34.4292	106.224	0.370931	0.0553		2014-08-05	432	9.5577	34.4239	99.7971	0.361222	0.0277		2014-08-06	431	9.7872	34.4259	100.1	0.365817	0.0285		2015-04-24	431	9.0042	34.4249	109.939	0.371817	0.0234		2015-04-25	431	8.8981	34.4222	104.173	0.34017	0.0239
	2013-10-16	431	9.5053	34.4293	106.364	0.371828	0.0472		2014-08-05	433	9.5419	34.4226	99.0901	0.356768	0.0306		2014-08-06	432	9.7754	34.4255	100.18	0.366316	0.0271		2015-04-24	432	8.9796	34.4248	109.731	0.370505	0.0251		2015-04-25	432	8.8565	34.4245	104.105	0.339753	0.0247
	2013-10-16	432	9.4867	34.429	106.305	0.371452	0.0289		2014-08-05	434	9.5212	34.4227	99.4029	0.358738	0.0278		2014-08-06	433	9.7599	34.4253	100.019	0.365319	0.0276		2015-04-24	433	8.9734	34.4258	109.683	0.370206	0.0246		2015-04-25	433	8.8451	34.4251	103.545	0.336278	0.0234
	2013-10-16	433	9.4748	34.4289	106.468	0.372494	0.0206		2014-08-05	435	9.5086	34.4229	99.4579	0.359085	0.0283		2014-08-06	434	9.7354	34.4245	99.5546	0.362438	0.032		2015-04-24	434	8.9736	34.4252	109.23	0.367347	0.0243		2015-04-25	434	8.84	34.4246	103.252	0.334461	0.0248
	2013-10-16	434	9.4765	34.4278	106.026	0.369666	0.0191		2014-08-05	436	9.4941	34.4233	99.1767	0.357313	0.0287		2014-08-06	435	9.7111	34.4247	99.6069	0.362763	0.0278		2015-04-24	435	8.9691	34.4249	109.193	0.367118	0.0241		2015-04-25	435	8.819	34.424	103.227	0.33431	0.024
	2013-10-16	435	9.4682	34.4288	106.135	0.370364	0.027		2014-08-05	437	9.4807	34.4218	98.8986	0.355561	0.0272		2014-08-06	436	9.691	34.4249	99.4631	0.361871	0.0254		2015-04-24	436	8.9625	34.4248	109.088	0.366456	0.0239		2015-04-25	436	8.8003	34.425	103.212	0.334217	0.0244
	2013-10-16	436	9.4482	34.4309	105.935	0.369085	0.0219		2014-08-05	438	9.4288	34.422	99.1217	0.356967	0.0247		2014-08-06	437	9.6786	34.4243	99.3967	0.36146	0.028		2015-04-24	437	8.9592	34.4248	109.107	0.366573	0.0234		2015-04-25	437	8.7919	34.4248	102.816	0.331759	0.0246
	2013-10-16	437	9.4402	34.4305	105.653	0.367279	0.0199		2014-08-05	439	9.3919	34.4232	98.9669	0.355991	0.0276		2014-08-06	438	9.6702	34.4245	99.3434	0.361129	0.0292		2015-04-24	438	8.9544	34.4243	109.203	0.367177	0.024		2015-04-25	438	8.7711	34.4237	102.751	0.331356	0.0242
	2013-10-16	438	9.4483	34.4297	102.559	0.347475	0.0283		2014-08-05	440	9.3716	34.423	98.6429	0.35395	0.0307		2014-08-06	439	9.6611	34.4243	99.3535	0.361192	0.0282		2015-04-24	439	8.9431	34.4241	109.172	0.366983	0.0257		2015-04-25	439	8.7453	34.4251	102.562	0.330187	0.0224
	2013-10-16	439	9.4329	34.4302	103.98	0.356573	0.0248		2014-08-05	441	9.3511	34.423	98.3068	0.351833	0.027		2014-08-06	440	9.6528	34.4241	99.2268	0.360406	0.0271		2015-04-24	440	8.9265	34.4246	109.149	0.366837	0.0291		2015-04-25	440	8.7309	34.4252	102.256	0.328284	0.0229
	2013-10-16	440	9.4264	34.4302	104.275	0.358458	0.0201		2014-08-05	442	9.3376	34.4224	98.0928	0.350485	0.0279		2014-08-06	441	9.6491	34.424	98.8719	0.358206	0.0276		2015-04-24	441	8.9006	34.4218	109.038	0.36614	0.0263		2015-04-25	441	8.7046	34.424	102.274	0.328397	0.0249
	2013-10-16	441	9.4253	34.4294	103.442	0.353131	0.0188		2014-08-05	443	9.317	34.4218	98.1183	0.350645	0.0288		2014-08-06	442	9.6402	34.4237	98.8598	0.358131	0.0264		2015-04-24	442	8.8592	34.4254	108.829	0.364822	0.0248		2015-04-25	442	8.6897	34.4254	102.395	0.32915	0.0249
	2013-10-16	442	9.4017	34.4295	103.436	0.353092	0.0235		2014-08-05	444	9.303	34.4222	98.0368	0.350132	0.031		2014-08-06	443	9.6122	34.4235	99.0297	0.359184	0.0303		2015-04-24	443	8.8536	34.4251	108.577	0.363234	0.025		2015-04-25	443	8.6835	34.4254	101.899	0.326071	0.0241
	2013-10-16	443	9.387	34.429	103.734	0.354997	0.0188		2014-08-05	445	9.2868	34.4218	98.2253	0.351319	0.0297		2014-08-06	444	9.5932	34.4242	98.897	0.358361	0.0307		2015-04-24	444	8.8559	34.4242	108.232	0.36106	0.0254		2015-04-25	444	8.6768	34.4252	101.621	0.324353	0.0242
	2013-10-16	444	9.3723	34.4288	104.142	0.357608	0.0205		2014-08-05	446	9.2777	34.4217	98.3129	0.351871	0.0299		2014-08-06	445	9.5693	34.4241	98.4164	0.355381	0.0289		2015-04-24	445	8.8381	34.4251	108.293	0.361447	0.0243		2015-04-25	445	8.6742	34.4252	101.71	0.324902	0.0254
	2013-10-16	445	9.356	34.4285	104.068	0.357133	0.0174		2014-08-05	447	9.2731	34.4215	98.0837	0.350427	0.0296		2014-08-06	446	9.536	34.4241	98.2444	0.354315	0.0275		2015-04-24	446	8.8323	34.4246	108.309	0.361546	0.0235		2015-04-25	446	8.6717	34.4251	101.78	0.325338	0.0241
	2013-10-16	446	9.3356	34.4283	104.178	0.357838	0.0174		2014-08-05	448	9.2595	34.421	98.1967	0.351139	0.0298		2014-08-06	447	9.5168	34.4238	98.2283	0.354216	0.0289		2015-04-24	447	8.8235	34.4252	108.346	0.361781	0.0245		2015-04-25	447	8.6668	34.4249	101.542	0.323858	0.0241
	2013-10-16	447	9.3375	34.4268	104.738	0.361425	0.0237		2014-08-05	449	9.2447	34.4217	97.9655	0.349683	0.0273		2014-08-06	448	9.4905	34.4242	98.0343	0.353013	0.0301		2015-04-24	448	8.8194	34.4249	108.302	0.361505	0.0263		2015-04-25	448	8.6618	34.4249	101.709	0.324895	0.0232
	2013-10-16	448	9.3067	34.4274	104.83	0.362012	0.0238		2014-08-05	450	9.2314	34.4218	97.4429	0.34639	0.0267		2014-08-06	449	9.471	34.4241	97.8684	0.351984	0.0284		2015-04-24	449	8.8181	34.4238	107.812	0.358418	0.0268		2015-04-25	449	8.6408	34.4246	101.74	0.325087	0.024
	2013-10-16	449	9.2996	34.4269	104.874	0.362295	0.0214		2014-08-05	451	9.2269	34.4218	97.1668	0.344651	0.0271		2014-08-06	450	9.4563	34.4235	97.3033	0.34848	0.0278		2015-04-24	450	8.7731	34.4216	108.127	0.360398	0.025		2015-04-25	450	8.6125	34.4255	101.472	0.323428	0.0238
	2013-10-16	450	9.2851	34.4265	105.731	0.36778	0.0142		2014-08-05	452	9.2194	34.4214	97.1801	0.344734	0.029		2014-08-06	451	9.4438	34.4234	97.2862	0.348374	0.0263		2015-04-24	451	8.735	34.4242	108.165	0.360638	0.0234		2015-04-25	451	8.6068	34.4254	101.307	0.322404	0.0254
	2013-10-16	451	9.2728	34.4262	105.346	0.365314	0.0075		2014-08-05	453	9.2059	34.4215	97.0609	0.343984	0.0258		2014-08-06	452	9.4329	34.423	97.074	0.347059	0.0259		2015-04-24	452	8.7219	34.4259	108.052	0.359929	0.0229		2015-04-25	452	8.595	34.4253	101.656	0.324565	0.0236
	2013-10-16	452	9.2613	34.4264	105.298	0.365005	0.0152		2014-08-05	454	9.2015	34.4213	97.2626	0.345254	0.027		2014-08-06	453	9.4156	34.4233	97.1032	0.34724	0.0286		2015-04-24	453	8.7203	34.426	107.532	0.356654	0.0243		2015-04-25	453	8.5851	34.4252	101.47	0.323415	0.0236
	2013-10-16	453	9.255	34.4263	105.349	0.365334	0.0209		2014-08-05	455	9.1955	34.4212	97.2402	0.345113	0.0283		2014-08-06	454	9.4045	34.4234	97.2108	0.347907	0.0278		2015-04-24	454	8.7374	34.4225	107.398	0.355805	0.0247		2015-04-25	454	8.5783	34.4255	101.045	0.320779	0.0239
	2013-10-16	454	9.2476	34.4261	105.304	0.365044	0.0142		2014-08-05	456	9.1871	34.421	97.011	0.343669	0.0307		2014-08-06	455	9.3995	34.423	97.0569	0.346953	0.0288		2015-04-24	455	8.7039	34.4259	107.554	0.356789	0.0248		2015-04-25	455	8.546	34.4246	101.057	0.320852	0.0222
	2013-10-16	455	9.239	34.4261	105.269	0.36482	0.0171		2014-08-05	457	9.1751	34.4211	96.9458	0.343258	0.0274		2014-08-06	456	9.3923	34.4227	96.8619	0.345744	0.0285		2015-04-24	456	8.703	34.4256	107.471	0.356267	0.0256		2015-04-25	456	8.5252	34.4264	100.738	0.318876	0.0236
	2013-10-16	456	9.2358	34.4261	105.46	0.366046	0.0184		2014-08-05	458	9.1663	34.4209	97.1037	0.344253	0.0255		2014-08-06	457	9.379	34.4225	96.9242	0.34613	0.0264		2015-04-24	457	8.7008	34.4255	107.362	0.355582	0.0243		2015-04-25	457	8.5237	34.4261	100.453	0.317106	0.0243
	2013-10-16	457	9.2347	34.4259	105.306	0.365057	0.0116		2014-08-05	459	9.1411	34.4213	97.1933	0.344818	0.0253		2014-08-06	458	9.3758	34.4226	96.7362	0.344964	0.0275		2015-04-24	458	8.7039	34.4252	107.294	0.355154	0.0243		2015-04-25	458	8.5133	34.4252	100.527	0.317568	0.0232
	2013-10-16	458	9.2319	34.4258	105.252	0.364715	0.0204		2014-08-05	460	9.1264	34.4212	96.4191	0.33994	0.0272		2014-08-06	459	9.3575	34.4225	96.7151	0.344833	0.0285		2015-04-24	459	8.6963	34.4241	107.243	0.354832	0.0236		2015-04-25	459	8.4988	34.4258	100.604	0.318044	0.0233
	2013-10-16	459	9.2214	34.4258	105.108	0.363792	0.0255		2014-08-05	461	9.1167	34.4213	96.357	0.339549	0.031		2014-08-06	460	9.3441	34.4222	96.5874	0.344042	0.0293		2015-04-24	460	8.679	34.4246	107.391	0.355763	0.0246		2015-04-25	460	8.4793	34.4262	100.364	0.316557	0.0243
	2013-10-16	460	9.2061	34.4261	104.797	0.361801	0.0202		2014-08-05	462	9.1121	34.4211	96.4385	0.340062	0.0315		2014-08-06	461	9.3213	34.4226	96.8136	0.345444	0.0309		2015-04-24	461	8.6667	34.4248	107.212	0.354633	0.0225		2015-04-25	461	8.4567	34.4262	100.741	0.318896	0.0223
	2013-10-16	461	9.2005	34.4253	104.951	0.36279	0.0225		2014-08-05	463	9.0918	34.4211	96.4996	0.340447	0.0301		2014-08-06	462	9.312	34.4222	96.8005	0.345363	0.0286		2015-04-24	462	8.6518	34.4249	107.024	0.353449	0.0226		2015-04-25	462	8.4382	34.4256	100.711	0.318711	0.0247
	2013-10-16	462	9.1862	34.4259	105.175	0.36422	0.0192		2014-08-05	464	9.0645	34.4209	96.5352	0.340672	0.03		2014-08-06	463	9.2901	34.4224	96.705	0.344771	0.0277		2015-04-24	463	8.6439	34.4256	106.815	0.352137	0.0236		2015-04-25	463	8.413	34.4267	100.422	0.316914	0.0241
	2013-10-16	463	9.1795	34.426	105.295	0.364985	0.0192		2014-08-05	465	9.0523	34.4215	96.3682	0.339619	0.0298		2014-08-06	464	9.2621	34.4226	96.5914	0.344067	0.027		2015-04-24	464	8.6388	34.424	106.638	0.351018	0.0256		2015-04-25	464	8.4055	34.4264	99.9975	0.314285	0.0247
	2013-10-16	464	9.1812	34.4254	105.061	0.363488	0.02		2014-08-05	466	9.039	34.4219	96.2439	0.338837	0.0296		2014-08-06	465	9.2247	34.4226	95.967	0.340195	0.0296		2015-04-24	465	8.6082	34.4249	106.784	0.351938	0.0261		2015-04-25	465	8.3706	34.4271	100.3	0.316161	0.0228
	2013-10-16	465	9.1774	34.4255	104.964	0.362869	0.0143		2014-08-05	467	9.0215	34.4219	95.8059	0.336077	0.0297		2014-08-06	466	9.2169	34.4223	95.8363	0.339385	0.0297		2015-04-24	466	8.6006	34.4258	106.586	0.35069	0.0227		2015-04-25	466	8.3675	34.427	99.8174	0.313168	0.0255
	2013-10-16	466	9.1748	34.4256	104.942	0.36273	0.0151		2014-08-05	468	8.9727	34.4223	95.4717	0.333972	0.029		2014-08-06	467	9.2124	34.4224	95.8795	0.339653	0.0286		2015-04-24	467	8.5995	34.4256	106.538	0.350391	0.0215		2015-04-25	467	8.3555	34.4264	99.6288	0.311999	0.0265
	2013-10-16	467	9.1771	34.4248	104.981	0.362981	0.0189		2014-08-05	469	8.9645	34.4219	95.3811	0.333401	0.0287		2014-08-06	468	9.2112	34.422	95.8966	0.339759	0.0284		2015-04-24	468	8.5977	34.4254	106.594	0.350742	0.0229		2015-04-25	468	8.3357	34.427	99.6032	0.31184	0.0253
	2013-10-16	468	9.1742	34.4253	104.868	0.362256	0.0152		2014-08-05	470	8.9578	34.4214	95.3933	0.333478	0.0256		2014-08-06	469	9.2087	34.422	95.7689	0.338967	0.0292		2015-04-24	469	8.5952	34.4251	106.521	0.350285	0.0248		2015-04-25	469	8.3219	34.4272	99.3528	0.310287	0.022
	2013-10-16	469	9.1728	34.4253	104.736	0.361412	0.0174		2014-08-05	471	8.9564	34.4212	95.5247	0.334306	0.026		2014-08-06	470	9.2058	34.4217	95.4813	0.337184	0.0271		2015-04-24	470	8.5798	34.4239	106.587	0.350695	0.0229		2015-04-25	470	8.3139	34.4272	99.2868	0.309878	0.0237
	2013-10-16	470	9.1699	34.4252	105.177	0.364233	0.0147		2014-08-05	472	8.9548	34.421	95.5491	0.33446	0.0296		2014-08-06	471	9.1905	34.422	95.5286	0.337477	0.0282		2015-04-24	471	8.5479	34.4254	106.543	0.35042	0.0227		2015-04-25	471	8.2986	34.427	99.2036	0.309363	0.0235
	2013-10-16	471	9.1604	34.4253	104.71	0.361247	0.0195		2014-08-05	473	8.9526	34.4208	95.4554	0.333869	0.032		2014-08-06	472	9.1805	34.422	95.4894	0.337234	0.0257		2015-04-24	472	8.5286	34.425	106.457	0.349881	0.0218		2015-04-25	472	8.2673	34.4281	98.8136	0.306944	0.0242
	2013-10-16	472	9.1504	34.4254	104.223	0.358129	0.016		2014-08-05	474	8.9438	34.4206	95.4106	0.333587	0.0296		2014-08-06	473	9.1744	34.4218	95.4632	0.337072	0.0236		2015-04-24	473	8.5158	34.4256	106.174	0.348094	0.0223		2015-04-25	473	8.2367	34.4286	98.7529	0.306568	0.024
	2013-10-16	473	9.1431	34.4255	104.606	0.360581	0.0146		2014-08-05	475	8.9251	34.4211	95.4707	0.333965	0.0294		2014-08-06	474	9.161	34.4216	95.4592	0.337047	0.0244		2015-04-24	474	8.4986	34.4258	105.766	0.345528	0.0243		2015-04-25	474	8.2324	34.4292	97.6361	0.299644	0.0239
	2013-10-16	474	9.1433	34.425	104.583	0.360429	0.0154		2014-08-05	476	8.9135	34.4212	95.4463	0.333811	0.0291		2014-08-06	475	9.1415	34.4214	95.3777	0.336542	0.0282		2015-04-24	475	8.4761	34.4237	105.759	0.345481	0.0247		2015-04-25	475	8.2242	34.429	98.138	0.302756	0.0249
	2013-10-16	475	9.1189	34.4256	104.665	0.360957	0.0269		2014-08-05	477	8.9059	34.421	95.2069	0.332303	0.0287		2014-08-06	476	9.1107	34.4218	95.4109	0.336748	0.0275		2015-04-24	476	8.436	34.4266	105.846	0.346032	0.0238		2015-04-25	476	8.2183	34.4284	98.2862	0.303674	0.0251
	2013-10-16	476	9.0911	34.4263	104.84	0.362078	0.0223		2014-08-05	478	8.8994	34.4209	95.0184	0.331116	0.0284		2014-08-06	477	9.0999	34.4217	95.3335	0.336268	0.0293		2015-04-24	477	8.4288	34.4271	105.896	0.346342	0.0221		2015-04-25	477	8.1965	34.4279	98.3959	0.304355	0.021
	2013-10-16	477	9.0737	34.4263	104.79	0.361754	0.0187		2014-08-05	479	8.8935	34.42	94.9328	0.330577	0.029		2014-08-06	478	9.093	34.4214	95.43	0.336866	0.0313		2015-04-24	478	8.4237	34.4267	105.728	0.345288	0.0235		2015-04-25	478	8.1645	34.4287	98.1114	0.302591	0.0218
	2013-10-16	478	9.0822	34.425	103.903	0.356078	0.0206		2014-08-05	480	8.8747	34.4207	95.1284	0.331809	0.0297		2014-08-06	479	9.0793	34.4214	95.2923	0.336012	0.0306		2015-04-24	479	8.4185	34.427	105.494	0.343811	0.0241		2015-04-25	479	8.1374	34.4297	97.9537	0.301613	0.0227
	2013-10-16	479	9.0695	34.4261	104.338	0.35886	0.0211		2014-08-05	481	8.8564	34.4212	95.324	0.333041	0.0294		2014-08-06	480	9.0698	34.4213	95.1113	0.33489	0.0295		2015-04-24	480	8.3976	34.4253	105.426	0.343383	0.0251		2015-04-25	480	8.1201	34.4299	97.9207	0.301408	0.0237
	2013-10-16	480	9.0545	34.426	104.482	0.359783	0.0193		2014-08-05	482	8.8365	34.4218	95.1518	0.331957	0.0285		2014-08-06	481	9.057	34.4215	95.2702	0.335875	0.0293		2015-04-24	481	8.3786	34.4267	105.475	0.343694	0.0249		2015-04-25	481	8.1037	34.43	97.7086	0.300093	0.0246
	2013-10-16	481	9.0505	34.4259	104.185	0.357885	0.0197		2014-08-05	483	8.8718	34.4189	94.3175	0.3267	0.0301		2014-08-06	482	9.0447	34.4212	95.2561	0.335788	0.0269		2015-04-24	482	8.3662	34.4271	105.458	0.343588	0.0251		2015-04-25	482	8.0909	34.4301	97.6809	0.299922	0.0245
	2013-10-16	482	9.0432	34.4259	103.834	0.355636	0.026		2014-08-05	484	8.8336	34.4193	94.9532	0.330705	0.0304		2014-08-06	483	9.0252	34.4213	94.9916	0.334148	0.026		2015-04-24	483	8.358	34.4273	105.286	0.342499	0.0258		2015-04-25	483	8.0732	34.4303	97.4635	0.298574	0.0247
	2013-10-16	483	9.0382	34.4253	103.354	0.352564	0.0193		2014-08-05	485	8.795	34.4219	95.0775	0.331488	0.0291		2014-08-06	484	9.0102	34.4212	94.9595	0.333949	0.0298		2015-04-24	484	8.3512	34.4267	105.099	0.341321	0.0259		2015-04-25	484	8.0643	34.4301	97.6979	0.300027	0.0224
	2013-10-16	484	9.027	34.426	103.822	0.355564	0.0146		2014-08-05	486	8.7824	34.4217	94.6089	0.328536	0.0272		2014-08-06	485	9.0015	34.4213	94.8187	0.333076	0.0311		2015-04-24	485	8.3342	34.427	104.821	0.339569	0.0247		2015-04-25	485	8.0579	34.4302	97.7779	0.300523	0.023
	2013-10-16	485	9.0177	34.4259	104.037	0.356935	0.015		2014-08-05	487	8.7763	34.4214	94.3837	0.327118	0.0282		2014-08-06	486	8.9926	34.4211	94.7885	0.332889	0.0284		2015-04-24	486	8.3284	34.427	104.513	0.33763	0.0239		2015-04-25	486	8.0502	34.4302	97.4795	0.298673	0.022
	2013-10-16	486	9.0076	34.4262	104.098	0.357324	0.0158		2014-08-05	488	8.7703	34.4215	94.3787	0.327086	0.0271		2014-08-06	487	8.989	34.4209	94.5914	0.331667	0.0256		2015-04-24	487	8.3253	34.427	104.642	0.338444	0.0232		2015-04-25	487	8.0286	34.4274	97.2994	0.297556	0.0233
	2013-10-16	487	9.0249	34.4251	103.198	0.351569	0.0184		2014-08-05	489	8.7602	34.4215	94.2004	0.325962	0.0302		2014-08-06	488	8.9747	34.4212	94.6116	0.331792	0.0258		2015-04-24	488	8.3193	34.4266	104.752	0.339136	0.0238		2015-04-25	488	7.9946	34.4298	97.5956	0.299393	0.025
	2013-10-16	488	9.0049	34.426	103.802	0.355432	0.02		2014-08-05	490	8.7504	34.4217	94.1515	0.325654	0.0305		2014-08-06	489	8.9519	34.4217	94.8117	0.333032	0.0279		2015-04-24	489	8.3117	34.4271	104.707	0.338854	0.0241		2015-04-25	489	7.9989	34.4309	97.2866	0.297477	0.0225
	2013-10-16	489	8.9971	34.4261	104.041	0.356962	0.0216		2014-08-05	491	8.7424	34.4217	94.0802	0.325205	0.0302		2014-08-06	490	8.9382	34.4221	94.6377	0.331954	0.0266		2015-04-24	490	8.3135	34.4265	104.616	0.33828	0.0245		2015-04-25	490	7.9874	34.4283	97.3633	0.297953	0.0227
	2013-10-16	490	8.983	34.4261	104.081	0.357219	0.0273		2014-08-05	492	8.74	34.4213	93.8601	0.323819	0.0292		2014-08-06	491	8.9228	34.422	94.2677	0.32966	0.0288		2015-04-24	491	8.2967	34.425	104.635	0.338397	0.0253		2015-04-25	491	7.9522	34.4296	97.3996	0.298177	0.0229
	2013-10-16	491	8.9662	34.4263	103.162	0.351338	0.0267		2014-08-05	493	8.7346	34.4211	93.8347	0.323658	0.0283		2014-08-06	492	8.9173	34.4213	93.8132	0.326842	0.0279		2015-04-24	492	8.2877	34.4275	104.635	0.338403	0.0249		2015-04-25	492	7.9666	34.4284	97.9473	0.301573	0.0243
	2013-10-16	492	8.9615	34.4259	103.59	0.354074	0.0248		2014-08-05	494	8.7286	34.4214	93.9365	0.3243	0.0282		2014-08-06	493	8.8845	34.4223	93.955	0.327721	0.0284		2015-04-24	493	8.2829	34.4271	104.582	0.338069	0.0245		2015-04-25	493	7.9326	34.4297	97.7352	0.300258	0.0253
	2013-10-16	493	8.9511	34.4263	103.479	0.353369	0.0217		2014-08-05	495	8.7242	34.4214	93.9182	0.324185	0.0275		2014-08-06	494	8.8577	34.4225	93.9479	0.327677	0.0294		2015-04-24	494	8.2776	34.4274	104.46	0.337296	0.0228		2015-04-25	494	7.9257	34.4303	98.0038	0.301923	0.0246
	2013-10-16	494	8.9394	34.4259	102.773	0.348846	0.0196		2014-08-05	496	8.7186	34.4214	93.8173	0.323549	0.0284		2014-08-06	495	8.8287	34.4227	93.784	0.326661	0.031		2015-04-24	495	8.2836	34.4271	104.264	0.336066	0.022		2015-04-25	495	7.9199	34.4298	98.5025	0.305015	0.0224
	2013-10-16	495	8.9118	34.4264	102.851	0.349347	0.0211		2014-08-05	497	8.7165	34.4213	93.687	0.322728	0.0295		2014-08-06	496	8.7957	34.4222	93.2018	0.323051	0.0283		2015-04-24	496	8.2789	34.4256	104.303	0.336312	0.0219		2015-04-25	496	7.904	34.4291	98.2435	0.30341	0.0234
	2013-10-16	496	8.8968	34.4265	102.93	0.349855	0.0247		2014-08-05	498	8.7112	34.4214	93.6442	0.322458	0.0293		2014-08-06	497	8.7616	34.4225	93.3497	0.323968	0.0279		2015-04-24	497	8.2686	34.427	104.388	0.336845	0.0231		2015-04-25	497	7.8871	34.4291	99.1951	0.30931	0.0225
	2013-10-16	497	8.8923	34.4265	102.411	0.346532	0.0264		2014-08-05	499	8.6999	34.4217	93.7389	0.323055	0.0287		2014-08-06	498	8.7435	34.4229	93.3607	0.324036	0.0285		2015-04-24	498	8.2633	34.4276	104.548	0.337853	0.024		2015-04-25	498	7.8758	34.4293	99.6384	0.312058	0.0235
	2013-10-16	498	8.8873	34.4263	101.917	0.343368	0.0204		2014-08-05	500	8.686	34.4217	93.4883	0.321476	0.0282		2014-08-06	499	8.725	34.4222	93.1365	0.322646	0.0288		2015-04-24	499	8.2622	34.4271	104.432	0.33712	0.0261		2015-04-25	499	7.8766	34.4296	99.2559	0.309686	0.0222
	2013-10-16	499	8.883	34.4256	102.332	0.346024	0.0228		2014-08-05	501	8.6617	34.4219	93.0829	0.318922	0.0287		2014-08-06	500	8.7053	34.4225	93.0611	0.322179	0.0293		2015-04-24	500	8.2558	34.427	104.369	0.336728	0.0243		2015-04-25	500	7.8685	34.4301	99.1898	0.309277	0.021
	2013-10-16	498	8.9167	34.4238	102.202	0.345194	0.0184										2014-08-06	501	8.6959	34.4224	93.0731	0.322253	0.0281		2015-04-24	501	8.2508	34.4267	104.329	0.33647	0.0227		2015-04-25	501	7.8452	34.4304	99.3635	0.310354	0.0222
	2013-10-16	497	8.9479	34.4235	101.788	0.342544	0.0158										2014-08-06	502	8.6935	34.4221	93.056	0.322148	0.0289		2015-04-24	502	8.247	34.4271	104.13	0.335216	0.0227		2015-04-25	502	7.8392	34.4302	97.7001	0.30004	0.0216
	2013-10-16	496	8.9471	34.4247	102.192	0.345128	0.0221										2014-08-06	503	8.6933	34.4217	93.0983	0.322409	0.0284		2015-04-24	503	8.233	34.4262	104.134	0.335245	0.0213		2015-04-25	503	7.8004	34.431	97.8855	0.30119	0.0235
																									2015-04-24	504	8.2227	34.427	104.263	0.336054	0.0223		2015-04-25	504	7.8075	34.4325	97.5296	0.298983	0.0237
																									2015-04-24	505	8.2151	34.4279	104.249	0.335972	0.0233		2015-04-25	505	7.7827	34.4311	97.6223	0.299558	0.0231
																									2015-04-24	506	8.2129	34.4278	104.111	0.335099	0.0222		2015-04-25	506	7.7544	34.4322	97.2365	0.297167	0.0252
																									2015-04-24	507	8.2063	34.4275	103.957	0.334126	0.0217		2015-04-25	507	7.7501	34.4325	97.4561	0.298528	0.0252
																									2015-04-24	508	8.1923	34.4272	103.66	0.332257	0.0236		2015-04-25	508	7.7374	34.4321	97.1992	0.296935	0.0225
																									2015-04-24	509	8.1685	34.428	103.727	0.332679	0.0242		2015-04-25	509	7.7373	34.4323	97.3761	0.298032	0.0252
																									2015-04-24	510	8.156	34.428	103.823	0.333283	0.0224		2015-04-25	510	7.7309	34.4312	97.6979	0.300027	0.0249
																									2015-04-24	511	8.1423	34.4292	103.622	0.332017	0.0215		2015-04-25	511	7.7207	34.432	97.6042	0.299446	0.0244
																									2015-04-24	512	8.136	34.4295	103.457	0.33098	0.0214		2015-04-25	512	7.7039	34.4318	97.9068	0.301322	0.0233
																									2015-04-24	513	8.1324	34.4293	103.278	0.329849	0.0244		2015-04-25	513	7.6972	34.4321	98.462	0.304764	0.0246
																									2015-04-24	514	8.1256	34.4286	103.237	0.329591	0.0234		2015-04-25	514	7.6904	34.4331	98.4162	0.30448	0.026
																									2015-04-24	515	8.1073	34.4287	103.133	0.328935	0.0248		2015-04-25	515	7.6845	34.4332	97.7811	0.300543	0.0242
																									2015-04-24	516	8.0944	34.4293	103.137	0.328964	0.0246		2015-04-25	516	7.6844	34.433	96.465	0.292383	0.0242
																									2015-04-24	517	8.0857	34.4296	103.175	0.329205	0.025		2015-04-25	517	7.6758	34.4333	96.854	0.294795	0.0243
																									2015-04-24	518	8.0817	34.4299	102.847	0.327136	0.0248		2015-04-25	518	7.6645	34.4338	96.8934	0.295039	0.0233
																									2015-04-24	519	8.0757	34.4296	102.912	0.327547	0.0252		2015-04-25	519	7.6565	34.4343	96.3031	0.291379	0.0238
																									2015-04-24	520	8.0694	34.4296	102.832	0.327043	0.0251		2015-04-25	520	7.6463	34.435	96.0516	0.28982	0.0236
																									2015-04-24	521	8.0621	34.43	102.914	0.327558	0.0238		2015-04-25	521	7.6445	34.4349	95.8374	0.288492	0.0246
																									2015-04-24	522	8.0563	34.43	102.568	0.325379	0.0222		2015-04-25	522	7.6438	34.4346	95.6914	0.287587	0.0271
																									2015-04-24	523	8.0408	34.429	102.509	0.32501	0.0228		2015-04-25	523	7.6352	34.4349	95.814	0.288347	0.0243
																									2015-04-24	524	8.0226	34.4296	102.659	0.325953	0.0239		2015-04-25	524	7.631	34.4348	95.6371	0.28725	0.024
																									2015-04-24	525	7.9963	34.4295	103.16	0.329111	0.0234		2015-04-25	525	7.624	34.4349	95.5763	0.286873	0.0238
																									2015-04-24	526	7.9721	34.4301	103.057	0.328461	0.0253		2015-04-25	526	7.615	34.4345	95.6584	0.287382	0.0238
																									2015-04-24	527	7.9587	34.4296	103.154	0.32907	0.025		2015-04-25	527	7.6077	34.4353	95.5316	0.286596	0.0248
																									2015-04-24	528	7.9477	34.4302	103.167	0.329152	0.0224		2015-04-25	528	7.6088	34.4348	95.5508	0.286715	0.0238
																									2015-04-24	529	7.9442	34.4305	103.253	0.329697	0.0229		2015-04-25	529	7.5963	34.4342	95.5145	0.28649	0.025
																									2015-04-24	530	7.9374	34.43	103.58	0.331753	0.0232		2015-04-25	530	7.5862	34.4356	95.3526	0.285486	0.0226
																									2015-04-24	531	7.9247	34.4303	103.712	0.332585	0.0248		2015-04-25	531	7.5707	34.4354	95.328	0.285334	0.0236
																									2015-04-24	532	7.9168	34.4296	103.729	0.332691	0.0238		2015-04-25	532	7.5552	34.4365	95.3984	0.28577	0.0235
																									2015-04-24	533	7.9054	34.4299	103.567	0.331671	0.0215		2015-04-25	533	7.5529	34.4362	95.2162	0.28464	0.0237
																									2015-04-24	534	7.8921	34.4301	103.56	0.33163	0.0206		2015-04-25	534	7.5507	34.4347	95.2503	0.284852	0.0259
																									2015-04-24	535	7.8861	34.4304	103.808	0.333189	0.0244		2015-04-25	535	7.534	34.4358	95.1405	0.284171	0.0239
																									2015-04-24	536	7.8715	34.429	103.999	0.334396	0.0239		2015-04-25	536	7.5416	34.4357	95.3227	0.285301	0.0237
																									2015-04-24	537	7.8523	34.4295	103.864	0.333546	0.0225		2015-04-25	537	7.5261	34.4355	95.5572	0.286754	0.0231
																									2015-04-24	538	7.8277	34.4288	103.886	0.333681	0.0226		2015-04-25	538	7.516	34.4366	95.3462	0.285446	0.022
																									2015-04-24	539	7.806	34.4326	103.567	0.331671	0.0246		2015-04-25	539	7.5243	34.436	95.279	0.28503	0.028
																									2015-04-24	540	7.7948	34.4326	102.723	0.326357	0.0252		2015-04-25	540	7.5045	34.4367	95.3195	0.285281	0.0256
																									2015-04-24	541	7.7919	34.4325	102.804	0.326867	0.0243		2015-04-25	541	7.5047	34.4367	95.1544	0.284257	0.0234
																									2015-04-24	542	7.7871	34.4325	102.784	0.326738	0.0236		2015-04-25	542	7.5011	34.4351	94.8453	0.282341	0.0243
																									2015-04-24	543	7.7856	34.4317	102.494	0.32491	0.0248		2015-04-25	543	7.4745	34.437	95.1725	0.284369	0.0238
																									2015-04-24	544	7.7791	34.4325	102.606	0.325619	0.0245		2015-04-25	544	7.4618	34.4371	95.0073	0.283345	0.0236
																									2015-04-24	545	7.7767	34.4324	102.64	0.32583	0.0229		2015-04-25	545	7.4808	34.4366	95.2567	0.284891	0.024
																									2015-04-24	546	7.7736	34.4324	102.55	0.325267	0.0244		2015-04-25	546	7.4527	34.4367	95.5092	0.286457	0.026
																									2015-04-24	547	7.771	34.4321	102.568	0.325379	0.0238		2015-04-25	547	7.4392	34.4374	95.3291	0.285341	0.0259
																									2015-04-24	548	7.7571	34.4319	102.375	0.32416	0.0233		2015-04-25	548	7.4598	34.4372	95.1778	0.284402	0.0215
																									2015-04-24	549	7.7469	34.4319	102.279	0.323557	0.0226		2015-04-25	549	7.4349	34.4349	95.1235	0.284065	0.0234
																									2015-04-24	550	7.7213	34.4316	102.128	0.322607	0.0243		2015-04-25	550	7.4156	34.4382	95.197	0.284521	0.0236
																									2015-04-24	551	7.7091	34.4334	102.024	0.321951	0.0227		2015-04-25	551	7.4241	34.4377	95.2513	0.284858	0.0245
																									2015-04-24	552	7.7029	34.4334	102.477	0.324805	0.0245		2015-04-25	552	7.4105	34.4361	95.5444	0.286675	0.0236
																									2015-04-24	553	7.7001	34.4335	102.513	0.325033	0.0235		2015-04-25	553	7.4152	34.4385	95.0659	0.283709	0.0233
																									2015-04-24	554	7.6973	34.4334	102.515	0.325045	0.0233		2015-04-25	554	7.4036	34.4353	95.36	0.285532	0.022
																									2015-04-24	555	7.6856	34.434	102.495	0.324916	0.0214		2015-04-25	555	7.3941	34.439	94.9082	0.282731	0.024
																									2015-04-24	556	7.6919	34.4339	102.449	0.324629	0.0212		2015-04-25	556	7.3846	34.4358	94.743	0.281707	0.0242
																									2015-04-24	557	7.6869	34.4326	102.091	0.322373	0.0229		2015-04-25	557	7.3549	34.4397	94.9871	0.28322	0.0238
																									2015-04-24	558	7.6573	34.4322	102.108	0.322479	0.0254		2015-04-25	558	7.3563	34.4399	94.4319	0.279778	0.0256
																									2015-04-24	559	7.6433	34.4351	102.16	0.322807	0.0243		2015-04-25	559	7.3387	34.4394	94.3147	0.279051	0.0223
																									2015-04-24	560	7.637	34.4352	102.028	0.321975	0.0233		2015-04-25	560	7.3306	34.4396	94.4329	0.279784	0.0227
																									2015-04-24	561	7.6339	34.435	101.339	0.317633	0.0252		2015-04-25	561	7.329	34.4395	94.5566	0.280551	0.0232
																									2015-04-24	562	7.6293	34.4347	101.202	0.316772	0.0257		2015-04-25	562	7.3298	34.4394	94.3637	0.279355	0.0238
																									2015-04-24	563	7.6221	34.4348	101.196	0.316737	0.0237		2015-04-25	563	7.3259	34.4395	94.4372	0.279811	0.027
																									2015-04-24	564	7.6137	34.4353	101.197	0.316743	0.0228		2015-04-25	564	7.3247	34.4398	94.5725	0.28065	0.0267
																									2015-04-24	565	7.6089	34.4354	101.153	0.316461	0.0233		2015-04-25	565	7.3288	34.4393	94.532	0.280399	0.0254
																									2015-04-24	566	7.6016	34.4347	100.903	0.314891	0.025		2015-04-25	566	7.3257	34.4365	94.5544	0.280537	0.0248
																									2015-04-24	567	7.592	34.4348	101.032	0.3157	0.0236		2015-04-25	567	7.3063	34.4378	94.6109	0.280888	0.0268
																									2015-04-24	568	7.5786	34.4353	101.085	0.316034	0.0243		2015-04-25	568	7.2888	34.4387	94.4916	0.280148	0.0292
																									2015-04-24	569	7.5725	34.4358	100.832	0.31444	0.0241		2015-04-25	569	7.2948	34.4401	94.5299	0.280385	0.0258
																									2015-04-24	570	7.5652	34.4355	100.816	0.31434	0.0234		2015-04-25	570	7.2984	34.438	94.5512	0.280518	0.0263
																									2015-04-24	571	7.5596	34.4357	100.746	0.313901	0.0236		2015-04-25	571	7.2781	34.4402	94.6152	0.280914	0.0246
																									2015-04-24	572	7.5554	34.4359	100.767	0.31403	0.0249		2015-04-25	572	7.2769	34.4363	94.5864	0.280736	0.0263
																									2015-04-24	573	7.5524	34.4358	100.478	0.312214	0.0243		2015-04-25	573	7.2462	34.4407	94.5928	0.280775	0.0253
																									2015-04-24	574	7.5452	34.4353	100.501	0.312354	0.0259		2015-04-25	574	7.2272	34.4415	94.304	0.278985	0.0254
																									2015-04-24	575	7.5339	34.4355	100.591	0.312922	0.0255		2015-04-25	575	7.1986	34.4386	94.4383	0.279817	0.0249
																									2015-04-24	576	7.5345	34.4358	100.713	0.31369	0.0238		2015-04-25	576	7.1841	34.4426	94.5022	0.280214	0.0269
																									2015-04-24	577	7.5202	34.4353	100.632	0.31318	0.024		2015-04-25	577	7.2002	34.4408	94.1346	0.277934	0.0244
																									2015-04-24	578	7.5107	34.4366	100.644	0.313256	0.023		2015-04-25	578	7.1845	34.442	94.3733	0.279414	0.0262
																									2015-04-24	579	7.5002	34.4361	100.735	0.313831	0.0247		2015-04-25	579	7.1697	34.4412	94.3264	0.279124	0.0235
																									2015-04-24	580	7.4887	34.437	100.762	0.314001	0.0249		2015-04-25	580	7.1648	34.442	94.2784	0.278826	0.0245
																									2015-04-24	581	7.4905	34.437	100.709	0.313667	0.0222		2015-04-25	581	7.1452	34.4423	94.2198	0.278463	0.0256
																									2015-04-24	582	7.4896	34.4342	100.712	0.313684	0.0209		2015-04-25	582	7.1399	34.4425	94.2593	0.278707	0.0243
																									2015-04-24	583	7.4523	34.435	100.745	0.313895	0.0215		2015-04-25	583	7.139	34.4423	94.19	0.278278	0.0241
																									2015-04-24	584	7.4445	34.4378	100.694	0.313573	0.0211		2015-04-25	584	7.1325	34.4423	94.3211	0.279091	0.0245
																									2015-04-24	585	7.4432	34.4376	100.69	0.313549	0.0222		2015-04-25	585	7.1275	34.4422	94.1175	0.277829	0.0264
																									2015-04-24	586	7.4521	34.4363	100.62	0.313104	0.0239		2015-04-25	586	7.1138	34.4428	94.0301	0.277287	0.0253
																									2015-04-24	587	7.4429	34.4367	100.719	0.313731	0.0239		2015-04-25	587	7.1097	34.4417	94.1591	0.278086	0.0237
																									2015-04-24	588	7.4373	34.4366	100.858	0.314604	0.024		2015-04-25	588	7.0988	34.4426	94.2188	0.278456	0.0232
																									2015-04-24	589	7.4279	34.4372	100.533	0.312559	0.025		2015-04-25	589	7.0985	34.4424	94.3243	0.27911	0.0222
																									2015-04-24	590	7.4115	34.4367	100.602	0.312993	0.0247		2015-04-25	590	7.0958	34.4421	94.5907	0.280762	0.0245
																									2015-04-24	591	7.4018	34.4377	100.494	0.312313	0.0212		2015-04-25	591	7.0918	34.4419	94.6482	0.281119	0.0244
																									2015-04-24	592	7.3947	34.4381	100.397	0.311698	0.0233		2015-04-25	592	7.0868	34.4419	94.7025	0.281456	0.0264
																									2015-04-24	593	7.3921	34.4381	100.456	0.312073	0.0235		2015-04-25	593	7.077	34.442	94.8091	0.282116	0.0262
																									2015-04-24	594	7.388	34.4379	100.336	0.311317	0.0242		2015-04-25	594	7.0703	34.4422	94.8283	0.282235	0.0264
																									2015-04-24	595	7.3809	34.4381	100.498	0.312337	0.0243		2015-04-25	595	7.057	34.4424	94.824	0.282209	0.0259
																									2015-04-24	596	7.3763	34.4382	100.474	0.312184	0.0239		2015-04-25	596	7.0516	34.4425	94.807	0.282103	0.0247
																									2015-04-24	597	7.3684	34.438	100.301	0.311094	0.0255		2015-04-25	597	7.0366	34.4427	94.8688	0.282486	0.0248
																									2015-04-24	598	7.366	34.4382	100.345	0.311376	0.0235		2015-04-25	598	7.0201	34.4428	94.8816	0.282566	0.024
																									2015-04-24	599	7.3635	34.438	100.456	0.312073	0.0253		2015-04-25	599	7.0119	34.4434	94.8198	0.282183	0.0242
																									2015-04-24	600	7.3578	34.4385	100.299	0.311083	0.0262		2015-04-25	600	7.0152	34.4424	94.9476	0.282975	0.0233
																									2015-04-24	601	7.3558	34.4383	100.359	0.311464	0.0249		2015-04-25	601	7.0068	34.4432	95.1203	0.284046	0.0237
																									2015-04-24	602	7.3475	34.4382	100.213	0.310544	0.0244		2015-04-25	602	7.0092	34.4436	94.8304	0.282249	0.0241
																									2015-04-24	603	7.3393	34.4383	100.053	0.309536	0.0248		2015-04-25	603	7.0028	34.443	95.1085	0.283973	0.0256
																									2015-04-24	604	7.3296	34.4391	100.243	0.310731	0.0235		2015-04-25	604	6.9952	34.4432	95.1416	0.284178	0.0258
																									2015-04-24	605	7.3246	34.4384	100.272	0.310913	0.0242		2015-04-25	605	6.9898	34.4428	95.2503	0.284852	0.0249
																									2015-04-24	606	7.3133	34.4385	100.195	0.310427	0.0233		2015-04-25	606	6.9798	34.4425	95.1043	0.283946	0.0245
																									2015-04-24	607	7.2911	34.4388	100.162	0.310221	0.0245		2015-04-25	607	6.9627	34.4434	95.1298	0.284105	0.0243
																									2015-04-24	608	7.2795	34.4405	100.482	0.312237	0.0234		2015-04-25	608	6.9738	34.4416	95.2236	0.284686	0.0247
																									2015-04-24	609	7.2641	34.4402	100.477	0.312208	0.0222		2015-04-25	609	6.9435	34.4441	95.2172	0.284647	0.0268
																									2015-04-24	610	7.2544	34.4401	100.45	0.312032	0.0225		2015-04-25	610	6.9376	34.4447	95.1671	0.284336	0.0261
																									2015-04-24	611	7.2482	34.4396	100.121	0.309964	0.0223		2015-04-25	611	6.926	34.4431	95.1107	0.283986	0.0249
																									2015-04-24	612	7.2193	34.4408	100.286	0.311001	0.0235		2015-04-25	612	6.9152	34.445	95.0414	0.283557	0.0235
																									2015-04-24	613	7.2124	34.4409	100.135	0.310052	0.0242		2015-04-25	613	6.9125	34.4449	95.0979	0.283907	0.0237
																									2015-04-24	614	7.2086	34.4408	100.311	0.311159	0.0231		2015-04-25	614	6.9021	34.4451	95.0904	0.283861	0.0234
																									2015-04-24	615	7.1944	34.4407	100.314	0.311176	0.0219		2015-04-25	615	6.8938	34.4452	94.8357	0.282282	0.0265
																									2015-04-24	616	7.1714	34.4406	100.27	0.310901	0.024		2015-04-25	616	6.8871	34.4458	94.8208	0.282189	0.0257
																									2015-04-24	617	7.1553	34.4415	100.128	0.310005	0.0238		2015-04-25	617	6.8864	34.4458	94.7345	0.281654	0.0246
																									2015-04-24	618	7.1487	34.4395	100.078	0.309694	0.0215		2015-04-25	618	6.8864	34.4451	94.8048	0.28209	0.0254
																									2015-04-24	619	7.1418	34.4415	100.215	0.310555	0.0212		2015-04-25	619	6.863	34.4432	94.6407	0.281073	0.0255
																									2015-04-24	620	7.129	34.4411	100.246	0.310749	0.0236		2015-04-25	620	6.8329	34.4474	94.5651	0.280603	0.0265
																									2015-04-24	621	7.1156	34.4413	100.311	0.311159	0.0229		2015-04-25	621	6.8352	34.448	94.4532	0.27991	0.0379
																									2015-04-24	622	7.092	34.4414	100.463	0.312114	0.0214		2015-04-25	622	6.8394	34.4477	94.5225	0.280339	0.027
																									2015-04-24	623	7.0763	34.4415	100.575	0.312823	0.02		2015-04-25	623	6.8303	34.4477	94.3786	0.279447	0.0237
																									2015-04-24	624	7.0576	34.4427	100.646	0.313268	0.0207		2015-04-25	624	6.8255	34.4454	94.0568	0.277452	0.0231
																									2015-04-24	625	7.0654	34.4421	100.689	0.313538	0.0221		2015-04-25	625	6.7769	34.4499	94.1943	0.278304	0.024
																									2015-04-24	626	7.0237	34.4428	100.701	0.313614	0.0211		2015-04-25	626	6.7749	34.4496	93.9183	0.276593	0.0239
																									2015-04-24	627	7.0157	34.4436	100.768	0.314036	0.0213		2015-04-25	627	6.7767	34.4493	93.8074	0.275906	0.0233
																									2015-04-24	628	7.0125	34.4436	100.818	0.314352	0.0236		2015-04-25	628	6.7753	34.4485	93.8522	0.276184	0.0213
																									2015-04-24	629	7.0041	34.4435	100.479	0.312219	0.0241		2015-04-25	629	6.7612	34.4492	93.6529	0.274948	0.0245
																									2015-04-24	630	7.0002	34.4441	100.54	0.3126	0.0222		2015-04-25	630	6.7552	34.4497	93.8405	0.276111	0.0262
																									2015-04-24	631	6.9982	34.444	100.561	0.312735	0.0209		2015-04-25	631	6.7603	34.4493	93.8032	0.27588	0.0257
																									2015-04-24	632	6.995	34.4435	100.33	0.311282	0.0226		2015-04-25	632	6.7454	34.4495	93.8117	0.275933	0.0239
																									2015-04-24	633	6.9813	34.4443	100.471	0.312167	0.0227		2015-04-25	633	6.7376	34.4496	93.7755	0.275708	0.0233
																									2015-04-24	634	6.9773	34.4441	100.361	0.311475	0.0217		2015-04-25	634	6.7458	34.4484	94.0376	0.277333	0.0258
																									2015-04-24	635	6.9724	34.4443	100.39	0.311657	0.0218		2015-04-25	635	6.7255	34.4495	93.9502	0.276791	0.0239
																									2015-04-24	636	6.9544	34.4444	100.342	0.311352	0.0228		2015-04-25	636	6.7199	34.45	93.8128	0.275939	0.0235
																									2015-04-24	637	6.9549	34.4438	100.387	0.311639	0.0229		2015-04-25	637	6.7121	34.4499	93.8692	0.276289	0.0263
																									2015-04-24	638	6.9268	34.444	100.331	0.311288	0.0211		2015-04-25	638	6.7128	34.4501	93.5911	0.274565	0.025
																									2015-04-24	639	6.9059	34.4445	100.232	0.310661	0.0225		2015-04-25	639	6.7004	34.4508	93.4899	0.273937	0.0263
																									2015-04-24	640	6.876	34.4452	100.378	0.311581	0.0235		2015-04-25	640	6.6935	34.4509	93.5474	0.274294	0.024
																									2015-04-24	641	6.8578	34.4471	100.422	0.311856	0.0232		2015-04-25	641	6.6809	34.4494	93.3929	0.273336	0.0223
																									2015-04-24	642	6.856	34.4471	100.343	0.311358	0.0224		2015-04-25	642	6.6693	34.451	93.6231	0.274763	0.0239
																									2015-04-24	643	6.8529	34.4471	100.211	0.310526	0.023		2015-04-25	643	6.6658	34.4499	94.0983	0.27771	0.0245
																									2015-04-24	644	6.8501	34.4471	100.008	0.309249	0.0225		2015-04-25	644	6.645	34.4504	93.8	0.27586	0.0245
																									2015-04-24	645	6.836	34.4471	99.9529	0.308903	0.0217		2015-04-25	645	6.6578	34.4496	94.385	0.279487	0.0243
																									2015-04-24	646	6.8183	34.4487	100.046	0.309489	0.0243		2015-04-25	646	6.6322	34.4517	94.2688	0.278767	0.023
																									2015-04-24	647	6.8166	34.4484	99.7502	0.307626	0.0215		2015-04-25	647	6.6294	34.4519	94.0525	0.277426	0.0231
																									2015-04-24	648	6.8085	34.4477	99.5493	0.30636	0.021		2015-04-25	648	6.6205	34.4516	93.6519	0.274942	0.0233
																									2015-04-24	649	6.7958	34.4483	99.5735	0.306513	0.0225		2015-04-25	649	6.6156	34.4525	93.6519	0.274942	0.024
																									2015-04-24	650	6.7863	34.4485	99.6116	0.306753	0.022		2015-04-25	650	6.6102	34.4519	93.021	0.27103	0.0224
																									2015-04-24	651	6.7812	34.4487	99.593	0.306636	0.0217		2015-04-25	651	6.5754	34.4528	93.1723	0.271969	0.0247
																									2015-04-24	652	6.7751	34.4474	99.8329	0.308147	0.0239		2015-04-25	652	6.5724	34.4537	92.8324	0.269861	0.0246
																									2015-04-24	653	6.7428	34.4476	99.9287	0.308751	0.0243		2015-04-25	653	6.5501	34.4542	93.0647	0.271301	0.0226
																									2015-04-24	654	6.7311	34.449	99.9166	0.308675	0.0234		2015-04-25	654	6.543	34.4542	92.9422	0.270541	0.0223
																									2015-04-24	655	6.7224	34.4491	100.003	0.30922	0.0241		2015-04-25	655	6.5509	34.4526	92.9603	0.270654	0.0245
																									2015-04-24	656	6.7084	34.449	100.342	0.311352	0.0249		2015-04-25	656	6.5399	34.4527	93.0605	0.271275	0.0236
																									2015-04-24	657	6.6957	34.4498	100.327	0.311259	0.024		2015-04-25	657	6.5252	34.454	93.021	0.27103	0.023
																									2015-04-24	658	6.6884	34.4506	100.226	0.310626	0.0246		2015-04-25	658	6.5366	34.4545	92.9102	0.270343	0.0238
																									2015-04-24	659	6.6853	34.4516	99.938	0.308809	0.0232		2015-04-25	659	6.5307	34.4523	93.0018	0.270911	0.0236
																									2015-04-24	660	6.6813	34.4512	99.5855	0.306589	0.0224		2015-04-25	660	6.5275	34.4541	92.9869	0.270819	0.0243
																									2015-04-24	661	6.6737	34.4507	99.5028	0.306067	0.0212		2015-04-25	661	6.5321	34.4532	92.9177	0.27039	0.0256
																									2015-04-24	662	6.6609	34.4509	99.4442	0.305698	0.0226		2015-04-25	662	6.5012	34.4546	92.9166	0.270383	0.0233
																									2015-04-24	663	6.6539	34.4513	99.6627	0.307075	0.0222		2015-04-25	663	6.4917	34.455	92.9155	0.270376	0.0254
																									2015-04-24	664	6.6484	34.4513	99.8459	0.308229	0.0219		2015-04-25	664	6.4728	34.4553	92.972	0.270726	0.0265
																									2015-04-24	665	6.6317	34.4523	99.7818	0.307825	0.0198		2015-04-25	665	6.4823	34.456	92.9837	0.270799	0.0231
																									2015-04-24	666	6.6291	34.4521	99.5204	0.306179	0.0218		2015-04-25	666	6.468	34.4511	93.0892	0.271453	0.0223
																									2015-04-24	667	6.6175	34.4506	99.2712	0.304609	0.0223		2015-04-25	667	6.4601	34.4565	92.7578	0.269398	0.0241
																									2015-04-24	668	6.5989	34.4511	99.5065	0.306091	0.0217		2015-04-25	668	6.4269	34.4556	92.9241	0.270429	0.0241
																									2015-04-24	669	6.5927	34.4518	99.8366	0.308171	0.0226		2015-04-25	669	6.4061	34.4583	92.8303	0.269848	0.0252
																									2015-04-24	670	6.5832	34.4501	100.101	0.309835	0.0225		2015-04-25	670	6.3991	34.4579	92.7909	0.269603	0.0226
																									2015-04-24	671	6.5667	34.4526	100.201	0.310468	0.0232		2015-04-25	671	6.4029	34.4576	92.3913	0.267126	0.0252
																									2015-04-24	672	6.5611	34.4525	100.14	0.310081	0.0228		2015-04-25	672	6.3941	34.4576	92.7237	0.269187	0.0262
																									2015-04-24	673	6.5585	34.4523	100.104	0.309858	0.0243		2015-04-25	673	6.3829	34.4578	92.7386	0.26928	0.0259
																									2015-04-24	674	6.5555	34.4528	99.951	0.308891	0.0236		2015-04-25	674	6.3898	34.4579	92.7163	0.269141	0.0248
																									2015-04-24	675	6.5538	34.4528	100.014	0.30929	0.0231		2015-04-25	675	6.3766	34.4556	92.8495	0.269967	0.0251
																									2015-04-24	676	6.552	34.4526	100.006	0.309237	0.0258		2015-04-25	676	6.368	34.4591	92.8388	0.269901	0.0233
																									2015-04-24	677	6.5494	34.4528	99.9994	0.309196	0.0243		2015-04-25	677	6.3612	34.4577	93.0626	0.271288	0.0245
																									2015-04-24	678	6.5428	34.4524	99.898	0.308558	0.0236		2015-04-25	678	6.3348	34.4582	93.2746	0.272603	0.0252
																									2015-04-24	679	6.5344	34.4527	99.8013	0.307948	0.024		2015-04-25	679	6.3201	34.4588	93.1223	0.271658	0.0238
																									2015-04-24	680	6.5294	34.4525	99.8664	0.308358	0.0239		2015-04-25	680	6.3067	34.4589	93.7552	0.275582	0.0223
																									2015-04-24	681	6.5219	34.4522	100.031	0.309395	0.0242		2015-04-25	681	6.2887	34.4587	94.2635	0.278734	0.0227
																									2015-04-24	682	6.5041	34.4531	100.63	0.313169	0.0229		2015-04-25	682	6.2791	34.459	94.2593	0.278707	0.0215
																									2015-04-24	683	6.4845	34.4547	100.245	0.310743	0.0218		2015-04-25	683	6.2745	34.4599	94.3285	0.279137	0.0255
																									2015-04-24	684	6.4711	34.4547	99.818	0.308054	0.0232		2015-04-25	684	6.2628	34.4597	94.2081	0.27839	0.0255
																									2015-04-24	685	6.4615	34.4554	99.6265	0.306847	0.0203		2015-04-25	685	6.2605	34.4607	94.0312	0.277294	0.0252
																									2015-04-24	686	6.4601	34.4555	99.3289	0.304972	0.0219		2015-04-25	686	6.2536	34.4602	93.5421	0.274261	0.023
																									2015-04-24	687	6.4584	34.4554	99.3735	0.305253	0.0235		2015-04-25	687	6.2402	34.4618	93.5474	0.274294	0.0251
																									2015-04-24	688	6.4557	34.4548	99.4302	0.30561	0.0215		2015-04-25	688	6.2294	34.4619	93.5368	0.274228	0.0222
																									2015-04-24	689	6.4453	34.4554	99.2749	0.304632	0.0218		2015-04-25	689	6.208	34.4627	93.4153	0.273475	0.0235
																									2015-04-24	690	6.4365	34.4555	99.0573	0.303261	0.0229		2015-04-25	690	6.1979	34.4635	92.9347	0.270495	0.0237
																									2015-04-24	691	6.4201	34.4556	99.3735	0.305253	0.0213		2015-04-25	691	6.1856	34.4639	93.0221	0.271037	0.0272
																									2015-04-24	692	6.41	34.4568	99.3289	0.304972	0.0205		2015-04-25	692	6.1862	34.4636	93.0221	0.271037	0.0246
																									2015-04-24	693	6.4083	34.4569	99.393	0.305376	0.0196		2015-04-25	693	6.1819	34.4634	93.1084	0.271572	0.0264
																									2015-04-24	694	6.4061	34.4568	99.4516	0.305745	0.0228		2015-04-25	694	6.1723	34.4637	93.0541	0.271235	0.0232
																									2015-04-24	695	6.4052	34.4566	99.3791	0.305288	0.0217		2015-04-25	695	6.166	34.464	93.0583	0.271262	0.0227
																									2015-04-24	696	6.4023	34.4567	99.3065	0.304831	0.0228		2015-04-25	696	6.1626	34.4638	93.005	0.270931	0.0226
																									2015-04-24	697	6.4	34.4568	99.2545	0.304503	0.0254		2015-04-25	697	6.1484	34.4635	93.0477	0.271196	0.0244
																									2015-04-24	698	6.3935	34.4571	99.3586	0.305159	0.0276		2015-04-25	698	6.1433	34.4648	93.1095	0.271579	0.0242
																									2015-04-24	699	6.389	34.4577	99.0331	0.303109	0.0249		2015-04-25	699	6.1259	34.4639	93.216	0.272239	0.0227
																									2015-04-24	700	6.3862	34.4577	99.3075	0.304837	0.0235		2015-04-25	700	6.1135	34.4657	93.3151	0.272854	0.0226
																									2015-04-24	701	6.3829	34.4578	99.2266	0.304327	0.0244		2015-04-25	701	6.1107	34.4656	93.248	0.272438	0.0264
																									2015-04-24	702	6.3796	34.4577	99.0731	0.303361	0.0217		2015-04-25	702	6.106	34.466	93.2736	0.272596	0.0275
																									2015-04-24	703	6.3732	34.4574	99.0006	0.302904	0.0213		2015-04-25	703	6.1061	34.4657	93.3556	0.273105	0.0263
																									2015-04-24	704	6.3635	34.4581	99.115	0.303624	0.0224		2015-04-25	704	6.1043	34.4655	93.1937	0.272101	0.0263
																									2015-04-24	705	6.3594	34.4584	99.0666	0.30332	0.0236		2015-04-25	705	6.1019	34.4657	93.3578	0.273118	0.0241
																									2015-04-24	706	6.3623	34.458	99.2033	0.304181	0.0234		2015-04-25	706	6.0998	34.4657	93.3151	0.272854	0.0247
																									2015-04-24	707	6.3577	34.4581	99.3047	0.304819	0.0204		2015-04-25	707	6.0967	34.4657	93.3663	0.273171	0.027
																									2015-04-24	708	6.3556	34.4586	99.2368	0.304392	0.0212		2015-04-25	708	6.09	34.4661	93.3908	0.273323	0.0247
																									2015-04-24	709	6.3536	34.4583	99.2852	0.304696	0.0206		2015-04-25	709	6.0854	34.4659	93.4547	0.273719	0.0232
																									2015-04-24	710	6.3491	34.4581	99.234	0.304374	0.0206		2015-04-25	710	6.0673	34.4642	93.4547	0.273719	0.0225
																									2015-04-24	711	6.3488	34.4581	99.1708	0.303976	0.0228		2015-04-25	711	6.0424	34.4675	93.6508	0.274935	0.0237
																									2015-04-24	712	6.3422	34.4571	99.2154	0.304257	0.0228		2015-04-25	712	6.0414	34.467	93.1191	0.271638	0.0216
																									2015-04-24	713	6.3291	34.4581	99.2015	0.304169	0.0227		2015-04-25	713	6.0217	34.465	93.2864	0.272675	0.023
																									2015-04-24	714	6.3223	34.459	99.1215	0.303665	0.0225		2015-04-25	714	6.0031	34.4678	93.1201	0.271645	0.0235
																									2015-04-24	715	6.3188	34.4591	99.0257	0.303062	0.0224		2015-04-25	715	6.0036	34.4687	93.3343	0.272973	0.0244
																									2015-04-24	716	6.317	34.4589	98.8415	0.301902	0.0225		2015-04-25	716	5.9873	34.469	93.2597	0.27251	0.0243
																									2015-04-24	717	6.3137	34.4589	98.8685	0.302072	0.0222		2015-04-25	717	5.9675	34.4685	93.1649	0.271922	0.0248
																									2015-04-24	718	6.3079	34.4588	99.1085	0.303583	0.0217		2015-04-25	718	5.9575	34.4702	93.0146	0.270991	0.0262
																									2015-04-24	719	6.292	34.4594	99.0973	0.303513	0.0211		2015-04-25	719	5.9571	34.4695	93.0487	0.271202	0.0244
																									2015-04-24	720	6.2794	34.4604	99.0908	0.303472	0.0228		2015-04-25	720	5.9523	34.4699	93.3386	0.272999	0.025
																									2015-04-24	721	6.2526	34.4607	99.0034	0.302921	0.0222		2015-04-25	721	5.9462	34.4703	93.07	0.271334	0.0249
																									2015-04-24	722	6.2208	34.4615	98.928	0.302447	0.0246		2015-04-25	722	5.9543	34.4692	93.1585	0.271883	0.0221
																									2015-04-24	723	6.2027	34.4636	98.8555	0.30199	0.024		2015-04-25	723	5.9427	34.4702	93.232	0.272338	0.0241
																									2015-04-24	724	6.1915	34.4634	98.9001	0.302271	0.0213		2015-04-25	724	5.9328	34.4694	92.9273	0.270449	0.0241
																									2015-04-24	725	6.1828	34.464	99.0601	0.303279	0.0204		2015-04-25	725	5.9222	34.4707	93.1212	0.271651	0.0224
																									2015-04-24	726	6.1792	34.4639	99.2191	0.30428	0.0206		2015-04-25	726	5.9126	34.4711	93.069	0.271328	0.024
																									2015-04-24	727	6.1726	34.4639	99.2033	0.304181	0.0189		2015-04-25	727	5.9081	34.4712	92.988	0.270826	0.0238
																									2015-04-24	728	6.1683	34.4641	99.0285	0.303079	0.019		2015-04-25	728	5.9062	34.4711	93.1702	0.271955	0.0239
																									2015-04-24	729	6.1619	34.4642	99.0368	0.303132	0.0225		2015-04-25	729	5.8991	34.4706	93.1809	0.272021	0.0223
																									2015-04-24	730	6.1523	34.464	99.1029	0.303548	0.0239		2015-04-25	730	5.8903	34.4712	93.1212	0.271651	0.0228
																									2015-04-24	731	6.1451	34.4643	99.1001	0.303531	0.0248		2015-04-25	731	5.8827	34.4713	93.1809	0.272021	0.0217
																									2015-04-24	732	6.1372	34.4647	99.0341	0.303115	0.0217		2015-04-25	732	5.8787	34.4716	93.2469	0.272431	0.0221
																									2015-04-24	733	6.1279	34.465	99.1168	0.303636	0.0222		2015-04-25	733	5.8785	34.4715	93.3546	0.273098	0.0254
																									2015-04-24	734	6.1213	34.4651	98.8769	0.302124	0.0224		2015-04-25	734	5.8721	34.4712	93.3482	0.273059	0.0248
																									2015-04-24	735	6.1178	34.4653	99.0722	0.303355	0.0231		2015-04-25	735	5.8731	34.4716	93.3023	0.272775	0.0224
																									2015-04-24	736	6.1135	34.4651	99.1754	0.304005	0.022		2015-04-25	736	5.8691	34.4714	93.2842	0.272662	0.0245
																									2015-04-24	737	6.1082	34.4651	99.101	0.303536	0.0213		2015-04-25	737	5.8554	34.472	93.2299	0.272325	0.0223
																									2015-04-24	738	6.1061	34.4651	99.1298	0.303718	0.0221		2015-04-25	738	5.8517	34.4719	93.2075	0.272187	0.0244
																									2015-04-24	739	6.102	34.4656	99.2982	0.304778	0.021		2015-04-25	739	5.8247	34.4723	93.2853	0.272669	0.0232
																									2015-04-24	740	6.1001	34.4655	99.181	0.30404	0.0202		2015-04-25	740	5.814	34.4739	93.1841	0.272041	0.0217
																									2015-04-24	741	6.0963	34.4654	99.1689	0.303964	0.0211		2015-04-25	741	5.8126	34.4738	93.1745	0.271982	0.0242
																									2015-04-24	742	6.092	34.4653	99.2517	0.304486	0.0218		2015-04-25	742	5.811	34.4737	93.2064	0.27218	0.0236
																									2015-04-24	743	6.0872	34.466	99.1205	0.303659	0.0232		2015-04-25	743	5.8086	34.4739	93.2832	0.272656	0.0254
																									2015-04-24	744	6.0803	34.4655	99.1652	0.303941	0.0243		2015-04-25	744	5.8019	34.4736	93.2874	0.272682	0.0252
																									2015-04-24	745	6.071	34.4663	99.1726	0.303988	0.0236		2015-04-25	745	5.7994	34.4739	93.1968	0.27212	0.0224
																									2015-04-24	746	6.071	34.4656	99.1996	0.304157	0.0229		2015-04-25	746	5.792	34.4734	93.4089	0.273435	0.0239
																									2015-04-24	747	6.0572	34.4665	99.2191	0.30428	0.022		2015-04-25	747	5.7879	34.4745	93.2224	0.272279	0.0237
																									2015-04-24	748	6.0504	34.4664	99.1745	0.303999	0.0214		2015-04-25	748	5.7777	34.4738	93.2587	0.272504	0.0199
																									2015-04-24	749	6.037	34.467	99.0945	0.303495	0.0226		2015-04-25	749	5.7683	34.475	93.2427	0.272405	0.0237
																									2015-04-24	750	6.0324	34.4675	99.0722	0.303355	0.023		2015-04-25	750	5.7619	34.4748	93.3951	0.273349	0.0219
																									2015-04-24	751	6.018	34.4669	98.8229	0.301785	0.0224		2015-04-25	751	5.7522	34.4755	93.3663	0.273171	0.0212
																									2015-04-24	752	6.0052	34.468	99.0396	0.30315	0.0224		2015-04-25	752	5.7402	34.476	93.3023	0.272775	0.0215
																									2015-04-24	753	5.9895	34.4689	98.9448	0.302552	0.0214		2015-04-25	753	5.7348	34.4765	93.1468	0.27181	0.0237
																									2015-04-24	754	5.9667	34.4688	98.9318	0.30247	0.0196		2015-04-25	754	5.7311	34.4766	93.2533	0.272471	0.0238
																									2015-04-24	755	5.949	34.4703	98.9234	0.302417	0.0209		2015-04-25	755	5.7255	34.4765	93.1809	0.272021	0.0244
																									2015-04-24	756	5.9459	34.4703	99.0089	0.302956	0.0222		2015-04-25	756	5.7165	34.4769	93.1542	0.271856	0.0236
																									2015-04-24	757	5.9448	34.4701	98.928	0.302447	0.0219		2015-04-25	757	5.7128	34.4769	93.411	0.273448	0.0221
																									2015-04-24	758	5.9413	34.4701	98.9624	0.302663	0.0212		2015-04-25	758	5.7097	34.4774	93.4366	0.273607	0.0251
																									2015-04-24	759	5.9328	34.4698	99.0368	0.303132	0.0213		2015-04-25	759	5.7107	34.4768	93.2832	0.272656	0.0245
																									2015-04-24	760	5.917	34.4709	99.021	0.303032	0.0227		2015-04-25	760	5.7072	34.4771	93.3023	0.272775	0.0243
																									2015-04-24	761	5.9116	34.4709	99.0647	0.303308	0.021		2015-04-25	761	5.6867	34.4777	93.1052	0.271552	0.0262
																									2015-04-24	762	5.906	34.4709	98.9225	0.302411	0.0226		2015-04-25	762	5.6687	34.477	93.1766	0.271995	0.0261
																									2015-04-24	763	5.8977	34.4714	98.8992	0.302265	0.0225		2015-04-25	763	5.6547	34.4793	93.2991	0.272755	0.0254
																									2015-04-24	764	5.895	34.4715	98.7625	0.301404	0.0202		2015-04-25	764	5.6576	34.479	93.2224	0.272279	0.023
																									2015-04-24	765	5.8892	34.4716	98.9383	0.302511	0.0233		2015-04-25	765	5.6473	34.479	93.183	0.272035	0.0233
																									2015-04-24	766	5.8871	34.4714	99.114	0.303618	0.022		2015-04-25	766	5.6438	34.4796	93.1723	0.271969	0.0234
																									2015-04-24	767	5.8787	34.4706	98.9345	0.302488	0.0221		2015-04-25	767	5.6363	34.4801	93.0573	0.271255	0.0237
																									2015-04-24	768	5.8694	34.4711	99.0461	0.303191	0.0234		2015-04-25	768	5.6343	34.4801	93.0818	0.271407	0.024
																									2015-04-24	769	5.8604	34.4717	99.0489	0.303208	0.0247		2015-04-25	769	5.6328	34.4801	93.1084	0.271572	0.0251
																									2015-04-24	770	5.8644	34.4719	99.022	0.303038	0.0228		2015-04-25	770	5.6301	34.4801	93.1766	0.271995	0.0241
																									2015-04-24	771	5.8569	34.4692	99.3828	0.305312	0.0223		2015-04-25	771	5.6264	34.4804	93.0541	0.271235	0.0251
																									2015-04-24	772	5.8186	34.4726	99.3038	0.304814	0.0217		2015-04-25	772	5.6243	34.4804	93.0924	0.271473	0.024
																									2015-04-24	773	5.815	34.474	99.0499	0.303214	0.0229		2015-04-25	773	5.6186	34.4802	92.9901	0.270839	0.0209
																									2015-04-24	774	5.8143	34.4738	99.1168	0.303636	0.0223		2015-04-25	774	5.6106	34.4807	93.0764	0.271374	0.024
																									2015-04-24	775	5.8158	34.4731	99.1205	0.303659	0.0212		2015-04-25	775	5.5979	34.481	93.1691	0.271949	0.0245
																									2015-04-24	776	5.8065	34.4721	99.0926	0.303484	0.0203		2015-04-25	776	5.5902	34.4814	93.329	0.27294	0.0213
																									2015-04-24	777	5.7918	34.4735	99.0759	0.303378	0.0191		2015-04-25	777	5.5809	34.4802	93.4025	0.273396	0.0207
																									2015-04-24	778	5.7806	34.4738	99.2173	0.304269	0.0189		2015-04-25	778	5.5689	34.4822	93.3364	0.272986	0.0228
																									2015-04-24	779	5.7766	34.4744	99.0294	0.303085	0.0237		2015-04-25	779	5.571	34.482	93.2192	0.272259	0.0237
																									2015-04-24	780	5.7559	34.4743	99.1122	0.303607	0.0239		2015-04-25	780	5.5616	34.4811	93.2874	0.272682	0.0239
																									2015-04-24	781	5.7435	34.476	99.2331	0.304368	0.0215		2015-04-25	781	5.5485	34.4829	93.3205	0.272887	0.0224
																									2015-04-24	782	5.7322	34.4764	99.2331	0.304368	0.0203		2015-04-25	782	5.5478	34.4827	93.037	0.271129	0.0225
																									2015-04-24	783	5.7313	34.4764	99.181	0.30404	0.0216		2015-04-25	783	5.5354	34.4834	93.3226	0.2729	0.0237
																									2015-04-24	784	5.7303	34.4763	99.2135	0.304245	0.0248		2015-04-25	784	5.528	34.4831	93.2278	0.272312	0.0232
																									2015-04-24	785	5.7245	34.4762	99.168	0.303958	0.0245		2015-04-25	785	5.5127	34.4839	93.2299	0.272325	0.0237
																									2015-04-24	786	5.7212	34.4766	99.1401	0.303782	0.0233		2015-04-25	786	5.5073	34.4838	93.4686	0.273805	0.023
																									2015-04-24	787	5.7029	34.4767	99.0099	0.302962	0.0245		2015-04-25	787	5.4888	34.4837	93.3972	0.273363	0.0256
																									2015-04-24	788	5.6946	34.4779	99.0554	0.303249	0.0228		2015-04-25	788	5.4675	34.4849	93.3823	0.27327	0.0237
																									2015-04-24	789	5.6912	34.4781	99.0452	0.303185	0.0229		2015-04-25	789	5.4731	34.4853	93.4931	0.273957	0.0234
																									2015-04-24	790	5.6906	34.4777	99.1447	0.303812	0.021		2015-04-25	790	5.4455	34.4839	93.4739	0.273838	0.022
																									2015-04-24	791	5.6837	34.4779	98.9541	0.302611	0.022		2015-04-25	791	5.4332	34.4869	93.345	0.273039	0.0222
																									2015-04-24	792	5.6768	34.4783	99.0434	0.303173	0.0231		2015-04-25	792	5.4358	34.4857	93.7318	0.275437	0.0241
																									2015-04-24	793	5.673	34.4783	99.1373	0.303765	0.0221		2015-04-25	793	5.4283	34.4864	93.9811	0.276983	0.0261
																									2015-04-24	794	5.6683	34.4785	99.1522	0.303859	0.0227		2015-04-25	794	5.425	34.4867	93.7563	0.275589	0.024
																									2015-04-24	795	5.6667	34.4787	99.0657	0.303314	0.0234		2015-04-25	795	5.4444	34.4846	93.8788	0.276349	0.022
																									2015-04-24	796	5.6657	34.4787	99.1308	0.303724	0.0198		2015-04-25	796	5.4227	34.4858	93.7968	0.27584	0.0236
																									2015-04-24	797	5.6636	34.4783	99.1652	0.303941	0.0217		2015-04-25	797	5.4177	34.4866	93.8746	0.276322	0.0239
																									2015-04-24	798	5.6551	34.4787	99.2145	0.304251	0.021		2015-04-25	798	5.4139	34.4864	93.8671	0.276276	0.0235
																									2015-04-24	799	5.647	34.4792	98.9345	0.302488	0.0221		2015-04-25	799	5.4108	34.4863	94.1005	0.277723	0.0225
																									2015-04-24	800	5.6407	34.4794	99.1094	0.303589	0.0241		2015-04-25	800	5.407	34.4867	94.1644	0.278119	0.0228
																									2015-04-24	801	5.6375	34.4797	99.2275	0.304333	0.0222		2015-04-25	801	5.4061	34.4864	94.1783	0.278205	0.023
																									2015-04-24	802	5.6336	34.4797	99.0517	0.303226	0.0212		2015-04-25	802	5.3869	34.4872	94.0728	0.277551	0.0247
																									2015-04-24	803	5.6274	34.4799	98.9773	0.302757	0.0219		2015-04-25	803	5.3793	34.4878	94.0333	0.277307	0.0244
																									2015-04-24	804	5.6252	34.479	99.1763	0.304011	0.0219		2015-04-25	804	5.3788	34.4875	94.1644	0.278119	0.0226
																									2015-04-24	805	5.61	34.4801	99.1763	0.304011	0.0223		2015-04-25	805	5.3742	34.4878	94.1719	0.278166	0.0223
																									2015-04-24	806	5.5995	34.4807	99.1745	0.303999	0.0223		2015-04-25	806	5.3729	34.4879	94.1474	0.278014	0.0236
																									2015-04-24	807	5.5991	34.481	99.1047	0.30356	0.021		2015-04-25	807	5.3599	34.4877	94.0099	0.277161	0.0235
																									2015-04-24	808	5.598	34.4804	99.0787	0.303396	0.0224		2015-04-25	808	5.3534	34.4887	94.077	0.277578	0.0231
																									2015-04-24	809	5.5859	34.481	99.114	0.303618	0.0241		2015-04-25	809	5.3539	34.4882	94.0877	0.277644	0.025
																									2015-04-24	810	5.5738	34.4816	98.9996	0.302898	0.0214		2015-04-25	810	5.3507	34.4888	94.157	0.278073	0.0236
																									2015-04-24	811	5.5662	34.4822	99.1494	0.303841	0.0202		2015-04-25	811	5.3506	34.4885	94.0674	0.277518	0.0233
																									2015-04-24	812	5.5635	34.4824	99.1317	0.30373	0.0204		2015-04-25	812	5.3402	34.4892	94.0749	0.277564	0.0239
																									2015-04-24	813	5.5472	34.4828	99.0508	0.30322	0.0222		2015-04-25	813	5.3344	34.4883	93.9524	0.276805	0.0225
																									2015-04-24	814	5.5392	34.4822	99.0815	0.303413	0.0237		2015-04-25	814	5.3262	34.4896	94.0909	0.277664	0.0245
																									2015-04-24	815	5.5289	34.4834	99.0536	0.303238	0.0236		2015-04-25	815	5.3241	34.4894	94.0674	0.277518	0.0234
																									2015-04-24	816	5.5251	34.4834	99.0722	0.303355	0.0225		2015-04-25	816	5.314	34.4897	93.9215	0.276613	0.0235
																									2015-04-24	817	5.5223	34.4835	99.0136	0.302986	0.0209		2015-04-25	817	5.3088	34.4899	93.9055	0.276514	0.024
																									2015-04-24	818	5.5176	34.4834	99.2052	0.304193	0.023		2015-04-25	818	5.3013	34.4903	94.0888	0.27765	0.025
																									2015-04-24	819	5.5113	34.4838	99.2749	0.304632	0.0249		2015-04-25	819	5.2953	34.4904	94.0706	0.277538	0.0265
																									2015-04-24	820	5.5129	34.4834	99.1791	0.304029	0.0241		2015-04-25	820	5.2915	34.4908	93.9076	0.276527	0.0233
																									2015-04-24	821	5.5076	34.4837	99.2377	0.304398	0.0226		2015-04-25	821	5.2763	34.4904	94.157	0.278073	0.0195
																									2015-04-24	822	5.5049	34.4838	99.2731	0.30462	0.0216		2015-04-25	822	5.2622	34.4919	94.0653	0.277505	0.0216
																									2015-04-24	823	5.5016	34.4839	99.2852	0.304696	0.0225		2015-04-25	823	5.2514	34.4913	94.0344	0.277313	0.0246
																									2015-04-24	824	5.5003	34.4839	99.3224	0.304931	0.024		2015-04-25	824	5.2284	34.4918	94.0504	0.277412	0.0228
																									2015-04-24	825	5.4984	34.4839	99.1522	0.303859	0.0223		2015-04-25	825	5.2269	34.4929	94.157	0.278073	0.0224
																									2015-04-24	826	5.4947	34.4837	99.0713	0.303349	0.021		2015-04-25	826	5.2174	34.492	94.4553	0.279923	0.0235
																									2015-04-24	827	5.4878	34.4839	99.1912	0.304105	0.0211		2015-04-25	827	5.207	34.4936	94.1261	0.277882	0.025
																									2015-04-24	828	5.4852	34.4841	99.2321	0.304362	0.0225		2015-04-25	828	5.207	34.4936	94.2518	0.278661	0.0208
																									2015-04-24	829	5.4789	34.4836	99.1085	0.303583	0.0241		2015-04-25	829	5.204	34.4943	94.255	0.278681	0.0222
																									2015-04-24	830	5.4732	34.4847	99.0675	0.303325	0.0251		2015-04-25	830	5.1942	34.4936	94.044	0.277373	0.0225
																									2015-04-24	831	5.4671	34.4848	99.3056	0.304825	0.0263		2015-04-25	831	5.1835	34.4943	93.8842	0.276382	0.0226
																									2015-04-24	832	5.4683	34.4847	99.2786	0.304655	0.0218		2015-04-25	832	5.1904	34.4945	94.0642	0.277498	0.0231
																									2015-04-24	833	5.4614	34.4844	99.2675	0.304585	0.0224		2015-04-25	833	5.1817	34.4928	94.1857	0.278252	0.0228
																									2015-04-24	834	5.4533	34.4854	99.2498	0.304474	0.0229		2015-04-25	834	5.1609	34.495	94.0291	0.27728	0.0238
																									2015-04-24	835	5.4535	34.4856	99.1996	0.304157	0.0226		2015-04-25	835	5.1629	34.496	94.0419	0.27736	0.0231
																									2015-04-24	836	5.4539	34.4831	99.5483	0.306355	0.0252		2015-04-25	836	5.1535	34.4936	94.1729	0.278172	0.0243
																									2015-04-24	837	5.4385	34.4852	99.6516	0.307005	0.0274		2015-04-25	837	5.1431	34.4963	94.0056	0.277135	0.0232
																									2015-04-24	838	5.4328	34.4859	99.486	0.305962	0.0267		2015-04-25	838	5.1378	34.4964	94.1431	0.277987	0.0226
																									2015-04-24	839	5.4363	34.4858	99.3196	0.304913	0.0224		2015-04-25	839	5.1275	34.497	94.1079	0.277769	0.0222
																									2015-04-24	840	5.4266	34.4851	99.4898	0.305985	0.0224		2015-04-25	840	5.1241	34.4969	93.7904	0.2758	0.0235
																									2015-04-24	841	5.4199	34.4862	99.4795	0.305921	0.0218		2015-04-25	841	5.1227	34.4964	94.4266	0.279745	0.0231
																									2015-04-24	842	5.4129	34.486	99.2907	0.304732	0.0218		2015-04-25	842	5.1107	34.4974	94.1676	0.278139	0.0249
																									2015-04-24	843	5.4185	34.4863	99.5911	0.306624	0.0211		2015-04-25	843	5.0905	34.4972	94.0301	0.277287	0.0247
																									2015-04-24	844	5.4155	34.4849	99.7111	0.30738	0.0227		2015-04-25	844	5.067	34.4981	93.8948	0.276448	0.0227
																									2015-04-24	845	5.3936	34.4859	99.9017	0.308581	0.0226		2015-04-25	845	5.068	34.4966	94.0941	0.277683	0.0225
																									2015-04-24	846	5.3885	34.4877	99.5353	0.306273	0.0224		2015-04-25	846	5.0359	34.5006	94.1388	0.277961	0.0215
																									2015-04-24	847	5.3846	34.4876	99.2898	0.304726	0.0215		2015-04-25	847	5.0444	34.4974	94.1005	0.277723	0.0225
																									2015-04-24	848	5.4027	34.485	99.8162	0.308042	0.0209		2015-04-25	848	5.0122	34.5009	94.1218	0.277855	0.0228
																									2015-04-24	849	5.3675	34.4858	99.7064	0.307351	0.0199		2015-04-25	849	5.0184	34.4994	94.3381	0.279196	0.0225
																									2015-04-24	850	5.3465	34.4884	99.6953	0.30728	0.0199		2015-04-25	850	4.9919	34.5023	94.4916	0.280148	0.0225
																									2015-04-24	851	5.34	34.489	99.6227	0.306823	0.0216		2015-04-25	851	4.9886	34.5021	94.4361	0.279804	0.024
																									2015-04-24	852	5.3409	34.4888	99.6674	0.307104	0.023		2015-04-25	852	4.9791	34.5021	94.287	0.278879	0.0246
																									2015-04-24	853	5.3322	34.4876	99.8924	0.308522	0.0219		2015-04-25	853	4.9749	34.5024	94.2816	0.278846	0.0244
																									2015-04-24	854	5.3138	34.49	99.9827	0.309091	0.0232		2015-04-25	854	4.9592	34.5021	94.5523	0.280524	0.0224
																									2015-04-24	855	5.3066	34.4905	99.8831	0.308464	0.0231		2015-04-25	855	4.9386	34.5035	94.4948	0.280167	0.0235
																									2015-04-24	856	5.3039	34.4904	99.7557	0.307661	0.0208		2015-04-25	856	4.9311	34.5037	95.0425	0.283563	0.0239
																									2015-04-24	857	5.3004	34.4903	99.7204	0.307438	0.0213		2015-04-25	857	4.9204	34.5042	95.1917	0.284488	0.0216
																									2015-04-24	858	5.294	34.4903	99.6785	0.307175	0.023		2015-04-25	858	4.9132	34.5036	95.0851	0.283828	0.023
																									2015-04-24	859	5.2883	34.4907	99.6888	0.307239	0.0244		2015-04-25	859	4.9078	34.5044	95.198	0.284528	0.0229
																									2015-04-24	860	5.285	34.4908	99.6088	0.306735	0.0251		2015-04-25	860	4.8948	34.5042	95.4303	0.285968	0.0233
																									2015-04-24	861	5.2798	34.4909	99.7883	0.307866	0.0248		2015-04-25	861	4.8814	34.5054	95.3153	0.285255	0.0206
																									2015-04-24	862	5.278	34.491	99.725	0.307468	0.0227		2015-04-25	862	4.872	34.5058	95.2449	0.284819	0.0232
																									2015-04-24	863	5.2703	34.4912	99.686	0.307222	0.0236		2015-04-25	863	4.8723	34.5054	95.376	0.285631	0.0222
																									2015-04-24	864	5.2647	34.4916	99.5725	0.306507	0.0246		2015-04-25	864	4.868	34.5056	95.4517	0.2861	0.0232
																									2015-04-24	865	5.2575	34.4912	99.5149	0.306144	0.0226		2015-04-25	865	4.8664	34.5054	95.4581	0.28614	0.0222
																									2015-04-24	866	5.2437	34.4915	99.5781	0.306542	0.0205		2015-04-25	866	4.8614	34.5048	95.5625	0.286787	0.0227
																									2015-04-24	867	5.2373	34.4922	99.7157	0.307409	0.0212		2015-04-25	867	4.8578	34.5055	95.5944	0.286986	0.0239
																									2015-04-24	868	5.228	34.4922	99.8943	0.308534	0.0234		2015-04-25	868	4.8604	34.5047	95.4708	0.286219	0.0225
																									2015-04-24	869	5.2167	34.4931	99.952	0.308897	0.021		2015-04-25	869	4.8393	34.5018	95.7916	0.288208	0.023
																									2015-04-24	870	5.2088	34.4934	99.7901	0.307878	0.0212		2015-04-25	870	4.8095	34.5063	95.7149	0.287732	0.023
																									2015-04-24	871	5.199	34.4923	99.8934	0.308528	0.0235		2015-04-25	871	4.8294	34.5034	95.8768	0.288736	0.0222
																									2015-04-24	872	5.1931	34.4924	99.7027	0.307327	0.0233		2015-04-25	872	4.8133	34.5051	95.8225	0.288399	0.0236
																									2015-04-24	873	5.1859	34.4907	100.379	0.311587	0.0221		2015-04-25	873	4.8227	34.5062	95.6882	0.287567	0.0238
																									2015-04-24	874	5.1696	34.4925	100.39	0.311657	0.0227		2015-04-25	874	4.7944	34.5061	95.8779	0.288743	0.0217
																									2015-04-24	875	5.16	34.4933	100.393	0.311675	0.0218		2015-04-25	875	4.7888	34.5076	95.7202	0.287765	0.0221
																									2015-04-24	876	5.1521	34.4947	100.383	0.31161	0.0218		2015-04-25	876	4.7775	34.5078	96.14	0.290368	0.022
																									2015-04-24	877	5.133	34.4962	100.543	0.312624	0.0227		2015-04-25	877	4.7656	34.5081	95.9386	0.28912	0.0244
																									2015-04-24	878	5.1232	34.4971	100.247	0.310755	0.0221		2015-04-25	878	4.7482	34.5089	95.8651	0.288664	0.0229
																									2015-04-24	879	5.1203	34.4972	99.9901	0.309138	0.0222		2015-04-25	879	4.7453	34.509	95.9141	0.288968	0.0228
																									2015-04-24	880	5.1191	34.497	99.7353	0.307532	0.0224		2015-04-25	880	4.7452	34.5087	96.1859	0.290652	0.0212
																									2015-04-24	881	5.1185	34.4964	99.6348	0.306899	0.0218		2015-04-25	881	4.7418	34.5089	96.2636	0.291135	0.0221
																									2015-04-24	882	5.1113	34.4971	99.7883	0.307866	0.0218		2015-04-25	882	4.7411	34.5087	96.1997	0.290738	0.0222
																									2015-04-24	883	5.1037	34.4969	99.6283	0.306858	0.022		2015-04-25	883	4.7401	34.5085	96.2562	0.291088	0.0203
																									2015-04-24	884	5.0981	34.497	99.7557	0.307661	0.0212		2015-04-25	884	4.7381	34.5086	96.334	0.291571	0.0194
																									2015-04-24	885	5.08	34.4946	100.143	0.310098	0.0219		2015-04-25	885	4.7301	34.5072	96.27	0.291174	0.0201
																									2015-04-24	886	5.0556	34.4965	100.168	0.310257	0.0225		2015-04-25	886	4.7199	34.5095	96.4	0.29198	0.0238
																									2015-04-24	887	5.0413	34.497	100.022	0.309337	0.0212		2015-04-25	887	4.7224	34.5073	96.5428	0.292866	0.0225
																									2015-04-24	888	5.0291	34.4969	100.304	0.311118	0.0218		2015-04-25	888	4.705	34.51	96.35	0.29167	0.0213
																									2015-04-24	889	5.0233	34.4981	100.814	0.314329	0.0224		2015-04-25	889	4.6921	34.5097	96.5748	0.293064	0.021
																									2015-04-24	890	5.0055	34.4953	101.153	0.316461	0.0201		2015-04-25	890	4.6725	34.5114	96.3478	0.291657	0.0248
																									2015-04-24	891	4.9852	34.5004	101.084	0.316028	0.0194		2015-04-25	891	4.6563	34.5124	96.5567	0.292951	0.0228
																									2015-04-24	892	4.9832	34.5001	100.97	0.315313	0.0196		2015-04-25	892	4.6531	34.5126	96.5514	0.292918	0.0213
																									2015-04-24	893	4.979	34.4999	101.027	0.31567	0.0234		2015-04-25	893	4.6441	34.514	96.4821	0.292489	0.0224
																									2015-04-24	894	4.976	34.5001	100.86	0.314616	0.024		2015-04-25	894	4.6397	34.5147	96.4704	0.292416	0.0222
																									2015-04-24	895	4.9738	34.5001	101.041	0.315758	0.0218		2015-04-25	895	4.6309	34.5132	96.253	0.291069	0.021
																									2015-04-24	896	4.9674	34.5	100.868	0.314668	0.0205		2015-04-25	896	4.6048	34.5154	96.48	0.292476	0.021
																									2015-04-24	897	4.9615	34.5006	100.867	0.314663	0.0234		2015-04-25	897	4.6018	34.5151	96.1539	0.290454	0.0223
																									2015-04-24	898	4.9556	34.5003	100.818	0.314352	0.0229		2015-04-25	898	4.5814	34.5163	96.4299	0.292165	0.0235
																									2015-04-24	899	4.9332	34.5014	100.963	0.315266	0.0222		2015-04-25	899	4.58	34.5157	96.4459	0.292264	0.0232
																									2015-04-24	900	4.9349	34.5004	100.931	0.315067	0.0217		2015-04-25	900	4.5659	34.5168	96.9275	0.295251	0.022
																									2015-04-24	901	4.9135	34.5025	101.099	0.316121	0.0204		2015-04-25	901	4.5674	34.5164	96.5205	0.292727	0.0229
																									2015-04-24	902	4.9068	34.5031	100.976	0.315348	0.0206		2015-04-25	902	4.5628	34.5164	96.5578	0.292958	0.0191
																									2015-04-24	903	4.9052	34.5032	100.891	0.314815	0.0211		2015-04-25	903	4.5597	34.5165	96.4938	0.292562	0.024
																									2015-04-24	904	4.9032	34.5022	101.067	0.315922	0.0224		2015-04-25	904	4.552	34.5168	96.6441	0.293493	0.0244
																									2015-04-24	905	4.8778	34.5038	100.932	0.315073	0.0244		2015-04-25	905	4.5427	34.5172	96.7773	0.294319	0.024
																									2015-04-24	906	4.8711	34.5049	101.014	0.315588	0.0243		2015-04-25	906	4.5353	34.5175	96.6196	0.293341	0.0223
																									2015-04-24	907	4.8696	34.5045	101.209	0.316819	0.0241		2015-04-25	907	4.5264	34.5181	96.7613	0.29422	0.0237
																									2015-04-24	908	4.8682	34.5044	101.122	0.316268	0.023		2015-04-25	908	4.5243	34.5181	96.7368	0.294068	0.0213
																									2015-04-24	909	4.8617	34.504	101.07	0.31594	0.0222		2015-04-25	909	4.5186	34.5183	96.6569	0.293572	0.0213
																									2015-04-24	910	4.8537	34.5048	101.025	0.315659	0.0233		2015-04-25	910	4.5168	34.5184	96.7016	0.29385	0.023
																									2015-04-24	911	4.8444	34.505	101.154	0.316467	0.023		2015-04-25	911	4.5149	34.5186	96.6345	0.293434	0.0235
																									2015-04-24	912	4.8429	34.5053	101.114	0.316221	0.0191		2015-04-25	912	4.5139	34.5185	96.6334	0.293427	0.0221
																									2015-04-24	913	4.8331	34.5054	101.188	0.316684	0.0215		2015-04-25	913	4.5111	34.5184	96.6878	0.293764	0.0207
																									2015-04-24	914	4.8148	34.5059	101.219	0.316877	0.0219		2015-04-25	914	4.5068	34.5186	96.691	0.293784	0.0227
																									2015-04-24	915	4.8135	34.5066	101.073	0.315957	0.0213		2015-04-25	915	4.5029	34.5189	96.7901	0.294398	0.0225
																									2015-04-24	916	4.8011	34.5071	101.318	0.317504	0.0212		2015-04-25	916	4.4956	34.5197	96.5993	0.293216	0.024
																									2015-04-24	917	4.7941	34.5072	101.366	0.317803	0.0229		2015-04-25	917	4.4919	34.5198	96.8114	0.29453	0.0231
																									2015-04-24	918	4.8001	34.5069	101.315	0.317487	0.0221		2015-04-25	918	4.4889	34.52	96.757	0.294194	0.0227
																									2015-04-24	919	4.7936	34.5052	101.6	0.319279	0.022		2015-04-25	919	4.4858	34.5199	96.5567	0.292951	0.0235
																									2015-04-24	920	4.7765	34.5066	101.523	0.318793	0.0221		2015-04-25	920	4.4808	34.5205	96.74	0.294088	0.0247
																									2015-04-24	921	4.7694	34.5088	101.534	0.318864	0.022		2015-04-25	921	4.4829	34.5201	96.5663	0.293011	0.0222
																									2015-04-24	922	4.78	34.5079	101.322	0.317528	0.0219		2015-04-25	922	4.4805	34.5203	96.7464	0.294127	0.021
																									2015-04-24	923	4.7773	34.5064	101.594	0.319244	0.0233		2015-04-25	923	4.4797	34.5205	96.6803	0.293718	0.0203
																									2015-04-24	924	4.7679	34.5084	101.6	0.319279	0.0235		2015-04-25	924	4.4815	34.5199	96.6153	0.293315	0.0224
																									2015-04-24	925	4.7616	34.508	101.222	0.316901	0.0239		2015-04-25	925	4.4654	34.5205	96.6984	0.29383	0.0228
																									2015-04-24	926	4.7583	34.5082	101.372	0.317844	0.0234		2015-04-25	926	4.4631	34.5214	96.5514	0.292918	0.0218
																									2015-04-24	927	4.7359	34.5095	101.36	0.317768	0.0233		2015-04-25	927	4.4544	34.5218	96.6185	0.293335	0.0208
																									2015-04-24	928	4.7322	34.5102	101.434	0.318237	0.0215		2015-04-25	928	4.4522	34.5214	96.6995	0.293837	0.0219
																									2015-04-24	929	4.7292	34.5106	101.314	0.317481	0.0215		2015-04-25	929	4.4431	34.522	96.8018	0.294471	0.0218
																									2015-04-24	930	4.7311	34.5095	101.666	0.319695	0.0217		2015-04-25	930	4.4294	34.5223	96.6664	0.293632	0.0215
																									2015-04-24	931	4.7222	34.5108	101.514	0.31874	0.0216		2015-04-25	931	4.4388	34.5213	96.7144	0.293929	0.0238
																									2015-04-24	932	4.7193	34.5113	101.411	0.31809	0.0196		2015-04-25	932	4.4213	34.5228	96.8465	0.294748	0.0246
																									2015-04-24	933	4.7086	34.5112	101.433	0.318225	0.0181		2015-04-25	933	4.4275	34.522	96.7932	0.294418	0.0236
																									2015-04-24	934	4.6979	34.5123	101.518	0.318764	0.0198		2015-04-25	934	4.4085	34.5237	96.9403	0.29533	0.0249
																									2015-04-24	935	4.7069	34.5104	101.454	0.31836	0.0229		2015-04-25	935	4.4061	34.5236	96.9328	0.295284	0.0248
																									2015-04-24	936	4.6921	34.5119	101.502	0.318664	0.0217		2015-04-25	936	4.4035	34.5238	96.9105	0.295145	0.0237
																									2015-04-24	937	4.6815	34.5122	101.37	0.317832	0.0223		2015-04-25	937	4.4027	34.524	96.9105	0.295145	0.0232
																									2015-04-24	938	4.6661	34.5125	101.309	0.317446	0.023		2015-04-25	938	4.4032	34.5237	96.936	0.295303	0.0231
																									2015-04-24	939	4.6687	34.5135	101.504	0.318676	0.0227		2015-04-25	939	4.4009	34.5241	96.8519	0.294782	0.0216
																									2015-04-24	940	4.6616	34.5107	101.733	0.320117	0.022		2015-04-25	940	4.3978	34.5242	97.0341	0.295911	0.0216
																									2015-04-24	941	4.6392	34.514	101.643	0.319549	0.0242		2015-04-25	941	4.3989	34.5238	97.0181	0.295812	0.0222
																									2015-04-24	942	4.6278	34.5143	101.552	0.318981	0.0213		2015-04-25	942	4.3926	34.5245	96.8423	0.294722	0.0216
																									2015-04-24	943	4.6191	34.5158	101.503	0.31867	0.0208		2015-04-25	943	4.391	34.5245	96.886	0.294993	0.0237
																									2015-04-24	944	4.6178	34.5156	101.662	0.319672	0.021		2015-04-25	944	4.3919	34.5242	96.9595	0.295449	0.0251
																									2015-04-24	945	4.6167	34.5148	101.887	0.32109	0.0211		2015-04-25	945	4.3889	34.5247	96.9712	0.295521	0.0232
																									2015-04-24	946	4.6056	34.5155	101.906	0.321207	0.0202		2015-04-25	946	4.3902	34.5243	97.0298	0.295885	0.0238
																									2015-04-24	947	4.5972	34.5159	101.976	0.321647	0.0199		2015-04-25	947	4.3924	34.524	96.9574	0.295436	0.0236
																									2015-04-24	948	4.5893	34.5155	101.747	0.320205	0.0217		2015-04-25	948	4.3819	34.5247	96.8913	0.295026	0.022
																									2015-04-24	949	4.579	34.5153	101.943	0.321441	0.0217		2015-04-25	949	4.378	34.5246	96.8455	0.294742	0.0218
																									2015-04-24	950	4.5731	34.5157	101.902	0.321184	0.0246		2015-04-25	950	4.3753	34.5247	97.0149	0.295792	0.0224
																									2015-04-24	951	4.5697	34.5157	102.004	0.321828	0.0221		2015-04-25	951	4.3699	34.5237	97.2547	0.297279	0.0233
																									2015-04-24	952	4.5658	34.5161	101.987	0.321717	0.0203		2015-04-25	952	4.3565	34.5254	97.1417	0.296579	0.0222
																									2015-04-24	953	4.5642	34.516	102.068	0.322227	0.0214		2015-04-25	953	4.3651	34.5244	96.9478	0.295376	0.0253
																									2015-04-24	954	4.5611	34.5161	101.883	0.321061	0.0203		2015-04-25	954	4.3541	34.5257	96.9446	0.295356	0.0233
																									2015-04-24	955	4.5566	34.5163	102.062	0.322191	0.0207		2015-04-25	955	4.3434	34.5251	97.0596	0.29607	0.0223
																									2015-04-24	956	4.5461	34.5152	102.141	0.322689	0.0208		2015-04-25	956	4.339	34.5264	97.016	0.295799	0.0228
																									2015-04-24	957	4.527	34.5181	102.016	0.321898	0.0207		2015-04-25	957	4.3352	34.5261	97.0096	0.295759	0.0223
																									2015-04-24	958	4.5165	34.5184	102.003	0.321816	0.0208		2015-04-25	958	4.3273	34.5273	97.1918	0.296889	0.0206
																									2015-04-24	959	4.5172	34.5186	101.963	0.321565	0.0212		2015-04-25	959	4.3297	34.5266	97.0831	0.296215	0.0245
																									2015-04-24	960	4.5088	34.5183	102.001	0.321805	0.0224		2015-04-25	960	4.3179	34.5267	97.1651	0.296724	0.0269
																									2015-04-24	961	4.4996	34.5188	101.79	0.320475	0.0224		2015-04-25	961	4.3077	34.5283	97.1683	0.296744	0.0234
																									2015-04-24	962	4.4891	34.5197	102.029	0.32198	0.0227		2015-04-25	962	4.3065	34.5281	97.1417	0.296579	0.0236
																									2015-04-24	963	4.4812	34.52	101.933	0.321377	0.0203		2015-04-25	963	4.3049	34.5281	97.4177	0.29829	0.0202
																									2015-04-24	964	4.4706	34.5204	102.027	0.321969	0.0212		2015-04-25	964	4.2998	34.5285	97.0916	0.296268	0.0201
																									2015-04-24	965	4.4606	34.5212	102.033	0.32201	0.0223		2015-04-25	965	4.2995	34.5285	97.2078	0.296988	0.0237
																									2015-04-24	966	4.4539	34.5212	102.157	0.322789	0.023		2015-04-25	966	4.2908	34.5281	97.2376	0.297173	0.0263
																									2015-04-24	967	4.4377	34.5213	102.14	0.322684	0.0235		2015-04-25	967	4.284	34.5292	97.0032	0.29572	0.0249
																									2015-04-24	968	4.424	34.5228	102.118	0.322543	0.0225		2015-04-25	968	4.2855	34.5288	97.1545	0.296658	0.0231
																									2015-04-24	969	4.4201	34.5229	102.326	0.323855	0.0249		2015-04-25	969	4.2819	34.5283	97.4443	0.298455	0.0211
																									2015-04-24	970	4.4166	34.5227	102.27	0.323498	0.0216		2015-04-25	970	4.274	34.5295	97.358	0.29792	0.0198
																									2015-04-24	971	4.4105	34.5233	102.203	0.323082	0.0218		2015-04-25	971	4.2759	34.5291	97.1854	0.296849	0.0228
																									2015-04-24	972	4.4142	34.523	102.346	0.323978	0.0217		2015-04-25	972	4.2534	34.5297	97.2824	0.297451	0.024
																									2015-04-24	973	4.4119	34.5222	102.341	0.323949	0.0216		2015-04-25	973	4.2418	34.5312	97.1321	0.296519	0.0216
																									2015-04-24	974	4.4024	34.523	102.433	0.324529	0.0226		2015-04-25	974	4.2419	34.5309	97.2866	0.297477	0.0226
																									2015-04-24	975	4.3984	34.5236	102.325	0.32385	0.0222		2015-04-25	975	4.2382	34.5309	97.2238	0.297087	0.022
																									2015-04-24	976	4.3888	34.5236	102.131	0.322625	0.0233		2015-04-25	976	4.2349	34.5314	97.2333	0.297147	0.022
																									2015-04-24	977	4.3964	34.5242	102.255	0.323404	0.0259		2015-04-25	977	4.2348	34.5311	97.2621	0.297325	0.0214
																									2015-04-24	978	4.3934	34.5218	102.31	0.323756	0.0226		2015-04-25	978	4.2309	34.5314	97.1161	0.29642	0.0218
																									2015-04-24	979	4.3764	34.5243	102.428	0.324494	0.021		2015-04-25	979	4.2276	34.5318	97.3037	0.297583	0.023
																									2015-04-24	980	4.3713	34.525	102.177	0.322918	0.0207		2015-04-25	980	4.2226	34.5323	96.6707	0.293658	0.0233
																									2015-04-24	981	4.3842	34.5238	102.24	0.32331	0.0225		2015-04-25	981	4.2228	34.5326	96.3425	0.291624	0.0216
																									2015-04-24	982	4.3742	34.522	102.427	0.324488	0.0234		2015-04-25	982	4.22	34.5324	95.8246	0.288413	0.0224
																									2015-04-24	983	4.3473	34.5246	102.539	0.325197	0.0241		2015-04-25	983	4.2018	34.5326	96.1294	0.290302	0.0226
																									2015-04-24	984	4.3295	34.5268	102.388	0.324242	0.0244		2015-04-25	984	4.1983	34.5333	96.2455	0.291022	0.0212
																									2015-04-24	985	4.3445	34.5266	102.01	0.321863	0.0215		2015-04-25	985	4.1899	34.5332	96.3532	0.29169	0.0216
																									2015-04-24	986	4.3218	34.5246	102.151	0.322754	0.0206		2015-04-25	986	4.1763	34.5346	96.383	0.291875	0.0228
																									2015-04-24	987	4.3023	34.5281	102.033	0.32201	0.0208		2015-04-25	987	4.1741	34.5348	96.3681	0.291782	0.0239
																									2015-04-24	988	4.3061	34.5281	102.1	0.322432	0.0216		2015-04-25	988	4.1709	34.5347	96.2072	0.290784	0.0203
																									2015-04-24	989	4.2897	34.5259	102.502	0.324963	0.0205		2015-04-25	989	4.1522	34.5359	96.172	0.290566	0.0218
																									2015-04-24	990	4.2747	34.5291	102.416	0.324424	0.0206		2015-04-25	990	4.1444	34.5359	96.1795	0.290613	0.0225
																									2015-04-24	991	4.2684	34.5297	102.362	0.324078	0.0218		2015-04-25	991	4.1329	34.5372	96.1773	0.290599	0.0218
																									2015-04-24	992	4.2692	34.5298	102.321	0.32382	0.0226		2015-04-25	992	4.1281	34.5367	96.2125	0.290817	0.0235
																									2015-04-24	993	4.2724	34.5265	102.284	0.323592	0.0236		2015-04-25	993	4.1141	34.5372	96.0356	0.289721	0.0231
																									2015-04-24	994	4.2518	34.5309	102.172	0.322883	0.0235		2015-04-25	994	4.1176	34.5375	96.1848	0.290646	0.0249
																									2015-04-24	995	4.247	34.5308	102.168	0.322859	0.021		2015-04-25	995	4.122	34.5359	96.2636	0.291135	0.0248
																									2015-04-24	996	4.2419	34.5315	102.144	0.322707	0.0196		2015-04-25	996	4.1067	34.5369	96.1454	0.290401	0.0242
																									2015-04-24	997	4.2472	34.5311	101.974	0.321635	0.0194		2015-04-25	997	4.0906	34.539	96.3926	0.291934	0.024
																									2015-04-24	998	4.2484	34.5299	101.847	0.320838	0.02		2015-04-25	998	4.0984	34.5381	96.2221	0.290877	0.0231
																									2015-04-24	999	4.2364	34.5305	101.968	0.3216	0.0222		2015-04-25	999	4.095	34.5385	96.1518	0.290441	0.0219
																									2015-04-24	1000	4.2273	34.5324	101.937	0.3214	0.023		2015-04-25	1000	4.0831	34.5393	96.2232	0.290884	0.0232
																									2015-04-24	1001	4.2258	34.5323	101.967	0.321594	0.023		2015-04-25	1001	4.082	34.5391	96.155	0.290461	0.0229
																									2015-04-24	1002	4.2242	34.5326	101.406	0.318055	0.0197
																									2015-04-24	1001	4.242	34.5309	101.666	0.319695	0.022
																									2015-04-24	1000	4.255	34.53	101.956	0.321523	0.0254

## Sheet: Table S4
	Supplement to Jurikova et al. (2022) Biogeosciences "New constraints on biological production and mixing processes in the South China Sea from triple isotope composition of dissolved oxygen"
	Table S3. Daily average wind speeds at SEATS obtained from the ERA5 satellite dataset (30 days preceding the sampling). Sampling days are highlighted in bold.
	Daily average wind speeds (ms-1) Oct 2013			Daily average wind speeds (ms-1) Aug 2014			Daily average wind speeds (ms-1) Apr 2015
	Date	Satellite		Date	Satellite		Date	Satellite
	2013-10-16	9.20158		2014-08-06	8.47996		2015-04-25	9.36917
	2013-10-15	4.52792		2014-08-05	7.30017		2015-04-24	9.45379
	2013-10-14	5.98004		2014-08-04	4.64108		2015-04-23	9.28483
	2013-10-13	12.2802		2014-08-03	5.35558		2015-04-22	7.67392
	2013-10-12	15.9442		2014-08-02	6.45462		2015-04-21	3.62538
	2013-10-11	9.89012		2014-08-01	5.73967		2015-04-20	5.23913
	2013-10-10	6.40775		2014-07-31	3.58446		2015-04-19	5.63617
	2013-10-09	2.75275		2014-07-30	2.14808		2015-04-18	4.118
	2013-10-08	1.74033		2014-07-29	3.33946		2015-04-17	3.56425
	2013-10-07	5.35117		2014-07-28	3.15554		2015-04-16	2.47708
	2013-10-06	7.07275		2014-07-27	3.29546		2015-04-15	4.05825
	2013-10-05	7.93125		2014-07-26	3.95637		2015-04-14	10.3187
	2013-10-04	8.46721		2014-07-25	5.14		2015-04-13	10.4663
	2013-10-03	8.77412		2014-07-24	7.36829		2015-04-12	9.86521
	2013-10-02	6.75308		2014-07-23	8.35921		2015-04-11	9.49946
	2013-10-01	7.53996		2014-07-22	6.53858		2015-04-10	8.30029
	2013-09-30	6.07196		2014-07-21	4.74675		2015-04-09	8.27542
	2013-09-29	7.50221		2014-07-20	3.5205		2015-04-08	8.88371
	2013-09-28	11.0112		2014-07-19	4.31225		2015-04-07	2.59817
	2013-09-27	13.2997		2014-07-18	10.8142		2015-04-06	3.38783
	2013-09-26	10.4607		2014-07-17	16.8492		2015-04-05	4.38175
	2013-09-25	7.85454		2014-07-16	10.7925		2015-04-04	3.58275
	2013-09-24	4.86025		2014-07-15	4.03604		2015-04-03	3.44704
	2013-09-23	5.36121		2014-07-14	3.05429		2015-04-02	3.29108
	2013-09-22	9.89646		2014-07-13	4.98025		2015-04-01	3.18275
	2013-09-21	11.2242		2014-07-12	6.46954		2015-03-31	2.51967
	2013-09-20	6.64271		2014-07-11	6.7565		2015-03-30	1.66767
	2013-09-19	5.28688		2014-07-10	5.65775		2015-03-29	4.78062
	2013-09-18	7.15454		2014-07-09	5.39717		2015-03-28	6.94212
	2013-09-17	8.08071		2014-07-08	5.06062		2015-03-27	7.36583
